# Supplementary material for: Synthesis and properties of thienonaphtho[bc]pyridines and thienonaphtho[bc]quinolines
Source: Royal Society of Chemistry journal article supplement (doi:10.1039/d4ob01023j), 2024-01-01

## SUPPORTING INFORMATION

### Table of Content

|                                                                                                         |    |
|---------------------------------------------------------------------------------------------------------|----|
| Optical Properties .....                                                                                | 3  |
| Acidochromic studies .....                                                                              | 3  |
| Cyclic voltammetry .....                                                                                | 4  |
| DFT and TD-DFT Calculations .....                                                                       | 5  |
| Cartesian coordinates of the optimized ground-state ( $S_0$ ) and excited-state ( $S_1$ ) structures .. | 6  |
| TD-DFT .....                                                                                            | 13 |
| $^1\text{H}$ -, $^{19}\text{F}$ -, and $^{13}\text{C}\{^1\text{H}\}$ -NMR Spectra.....                  | 16 |

Single-crystal X-ray diffraction data

Crystals were obtained by slow evaporation of Hep/CH<sub>2</sub>Cl<sub>2</sub> 2:1 at 25°C. X-ray single crystal structure analysis was performed on a Bruker Apex Kappa-II CCD-diffractometer.

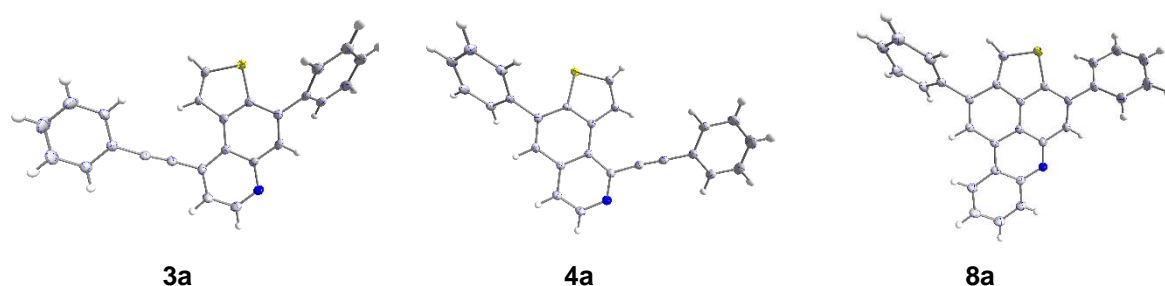

**Figure S1.** ORTEPs of crystal structures **3a**, **4a** and **8a** (drawn with ellipsoids probability of 50%).

**Table S1.** Single crystal X-ray diffraction data of compounds **3a**, **4a** and **8a**.

|                                              | <b>3a</b>                          | <b>4a</b>                          | <b>8a</b>                          |
|----------------------------------------------|------------------------------------|------------------------------------|------------------------------------|
| <b>Chem. Formula</b>                         | C <sub>25</sub> H <sub>15</sub> NS | C <sub>25</sub> H <sub>15</sub> NS | C <sub>29</sub> H <sub>17</sub> NS |
| <b>Form. Weight<br/>[g mol<sup>-1</sup>]</b> | 361.44                             | 361.44                             | 411.50                             |
| <b>Cryst. system</b>                         | triclinic                          | triclinic                          | Triclinic                          |
| <b>Space group<br/>(Hall group)</b>          | P -1(-P 1)                         | P -1(-P 1)                         | P -1(-P 1)                         |
| <b>a [Å]</b>                                 | 7.904(6)                           | 8.0985(9)                          | 8.0321(4)                          |
| <b>b [Å]</b>                                 | 10.247(7)                          | 10.3014(12)                        | 10.3560(5)                         |
| <b>c [Å]</b>                                 | 11.533(8)                          | 11.0803(12)                        | 13.1722(6)                         |
| <b>α [°]</b>                                 | 96.72(2)                           | 96.301(4)                          | 105.953(2)                         |
| <b>β [°]</b>                                 | 102.06(2)                          | 101.547(3)                         | 95.907(2)                          |
| <b>γ [°]</b>                                 | 99.58(2)                           | 101.238(4)                         | 108.672(2)                         |
| <b>V [Å<sup>3</sup>]</b>                     | 889.5(11)                          | 877.60(17)                         | 975.86(8)                          |
| <b>Z</b>                                     | 2                                  | 2                                  | 2                                  |
| <b>N<sub>ref</sub></b>                       | 4082(4075)                         | 5128(5119)                         | 5699(5693)                         |
| <b>θ<sub>max</sub> [°]</b>                   | 27.490                             | 29.997                             | 29.999                             |
| <b>h,k,l<sub>max</sub></b>                   | 10,13,14                           | 11,14,15                           | 11,14,18                           |
| <b>D<sub>x</sub>[g cm<sup>-3</sup>]</b>      | 1.349                              | 1.368                              | 1.400                              |
| <b>μ [mm<sup>-1</sup>]</b>                   | 0.191                              | 0.193                              | 0.184                              |
| <b>λ<sub>MoKα</sub> [Å]</b>                  | 0.71073                            | 0.71073                            | 0.71073                            |
| <b>T [K]</b>                                 | 123                                | 123                                | 123                                |

|                        |              |              |              |
|------------------------|--------------|--------------|--------------|
| <b>F(000)</b>          | 376.0        | 376.0        | 428.0        |
| <b>N<sub>par</sub></b> | 244          | 244          | 381          |
| <b>R</b>               | 0.0704(2451) | 0.0516(3778) | 0.0407(4636) |
| <b>wR2</b>             | 0.1397(4075) | 0.1255(5119) | 0.1168(5693) |
| <b>S</b>               | 1.011        | 1.039        | 1.052        |

## Optical Properties

### Acidochromic studies

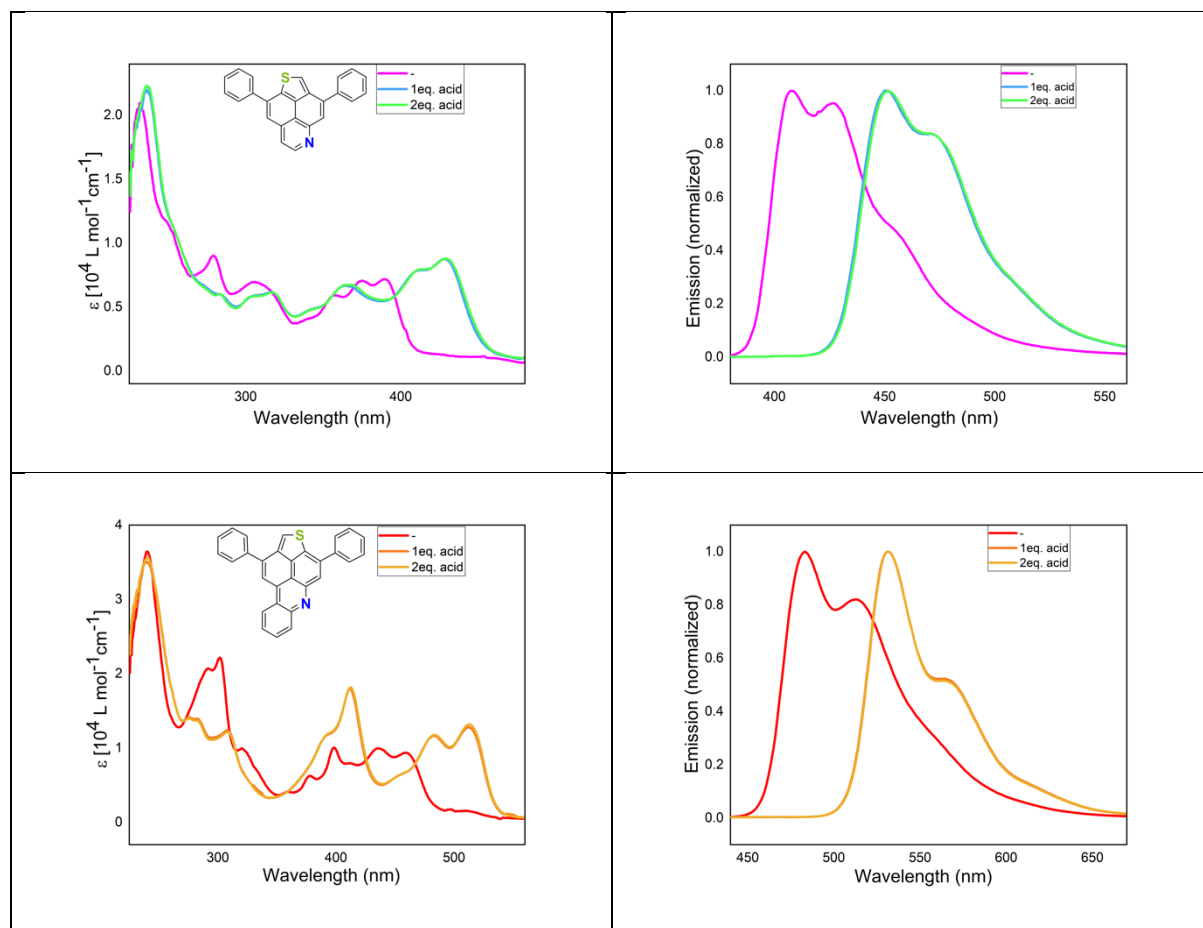

**Figure S2.** Absorption and emission spectra of **6a** and **8a** in  $\text{CH}_2\text{Cl}_2$  ( $c = 10^{-5} \text{ M}$ ) at  $20^\circ\text{C}$  with different concentration of TFA.

## Cyclic voltammetry

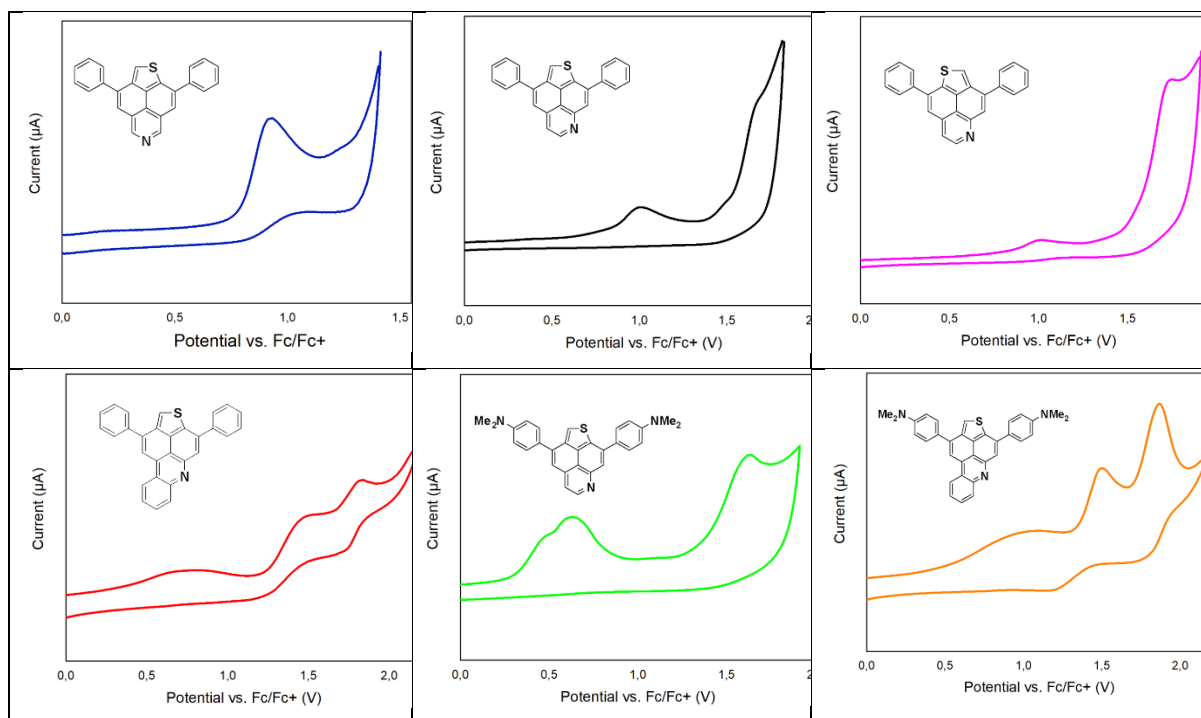

**Figure S3.** Cyclic voltammograms of TNP, **5a**, **6a**, **8a**, **5j** and **8c** measured in CH<sub>2</sub>Cl<sub>2</sub> with 0.1 M n-Bu<sub>4</sub>NPF<sub>6</sub> as a supporting electrolyte, glassy carbon working electrode, ANE2 as reference electrode and Pt counter-electrode with ferrocene as standard at a scan rate of 50 mV<sup>s</sup><sup>-1</sup>.

## DFT and TD-DFT Calculations

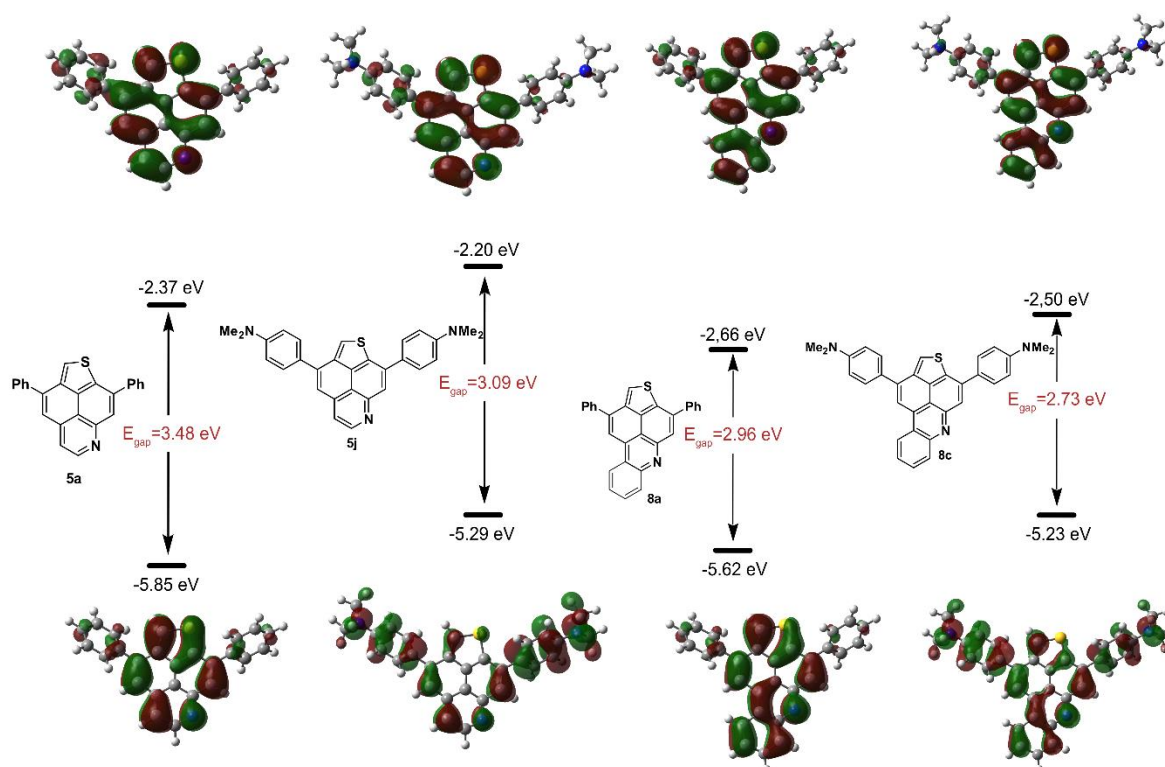

**Scheme S1.** Calculated frontier molecular orbitals and energy levels of **5a**, **5j**, **8a** and **8c** at the B3LYP/6-311+G(d,p) level of theory within IEFPCM of dichloromethane (isovalue = 0.02 a.u.).

**Table S2.** Comparison of optical, electrochemical and calculated band gap.

|                            | <b>5a</b> | <b>5j</b> | <b>6a</b> | <b>8a</b> | <b>8c</b> |
|----------------------------|-----------|-----------|-----------|-----------|-----------|
| $E_{(HOMO)^{CV}} [eV]^a$   | -5.59     | -5.10     | -5.63     | -5.17     | -5.20     |
| $E_{(HOMO)^{calc}} [eV]^b$ | -5.68     | -5.29     | -5.85     | -5.62     | -5.23     |
| $E_{(LUMO)^{calc}} [eV]^b$ | -2.21     | -2.20     | -2.33     | -2.66     | -2.50     |
| $E_g^{CV} [eV]^c$          | 3.38      | 2.61      | 3.05      | 2.61      | 2.33      |
| $E_g^{calc} [eV]^b$        | 3.47      | 3.09      | 3.52      | 2.96      | 2.73      |
| $E_g^{opt} [eV]^d$         | 2.91      | 2.25      | 2.63      | 2.25      | 2.01      |

a) Calculated using the equation:  $E(HOMO) = -e[E_{Ox}^{onset} \text{ vs. } Fc/Fc^+] + 4.80$ . b) Calculated DFT energy levels at the B3LYP/6-31G(d,p) level of theory within IEFPCM of dichloromethane. c) Calculated using correction factor:  $E(LUMO) = 1.16E_g^{opt} - E(HOMO)^{CV}$ .<sup>45</sup> d) Estimated from the intersection of normalized absorption and emission spectra. [e] Calculated TD-DFT excitation energies ( $\Delta E$ ) at the CAM-B3LYP/6-31+G(d,p) level of theory within IEFPCM for **5a** and **6a**. [f] Calculated TD-DFT excitation energies ( $\Delta E$ ) at the B3LYP/6-31+G(d,p) level of theory within IEFPCM for **5j**, **8a** and **8c**.

Cartesian coordinates of the optimized ground-state ( $S_0$ ) and excited-state ( $S_1$ ) structures

Calculated by (TD-)DFT at the B3LYP/6-311G(d,p) level of theory for ground state in gas phase and within IEFPCM of dichloromethane. The local minima of the optimized geometries were confirmed by frequency calculations, ensuring that no imaginary frequencies are presented. The stated Energy E for the  $S_0$  state is the sum of electronic and zero-point Energies.

**Table S3.** Cartesian Coordinates of **5a** ( $S_0$ ); E = -1414.931728 Hartree.

| Symbol | X          | Y          | Z          |
|--------|------------|------------|------------|
| C      | -1.1900513 | 2.4040533  | -0.0015588 |
| C      | 0.0386239  | 1.6992679  | 0.0083882  |
| C      | 1.2817949  | 2.3807005  | 0.0095813  |
| C      | 1.2126710  | 3.7737565  | 0.0023390  |
| C      | -2.3997463 | 1.6443146  | 0.0034792  |
| C      | 0.0263423  | 0.3001766  | 0.0159655  |
| C      | -1.1653025 | -0.4196149 | 0.0407779  |
| C      | -2.4226207 | 0.2588899  | 0.0279363  |
| C      | 0.9213687  | -1.8280658 | 0.0127962  |
| C      | 1.2248368  | -0.4846276 | -0.0044142 |
| C      | 2.5002344  | 0.2195719  | -0.0115854 |
| C      | 2.4928190  | 1.5909060  | 0.0044746  |
| H      | 3.4385329  | 2.1210592  | -0.0176440 |
| H      | -3.3317345 | 2.1965606  | 0.0113678  |
| H      | 2.1092864  | 4.3824659  | 0.0023365  |
| H      | 1.5919021  | -2.6728341 | 0.0262845  |
| S      | -0.7900318 | -2.1306231 | 0.0318656  |
| C      | -3.7154162 | -0.4750174 | 0.0337191  |
| C      | -3.9528721 | -1.5209858 | 0.9378792  |
| C      | -4.7360402 | -0.1175638 | -0.8596011 |
| C      | -5.1757294 | -2.1878507 | 0.9479441  |
| H      | -3.1904914 | -1.7957885 | 1.6571661  |
| C      | -5.9568077 | -0.7867599 | -0.8499026 |
| H      | -4.5626076 | 0.6782153  | -1.5747442 |
| C      | -6.1809635 | -1.8249201 | 0.0533819  |
| H      | -5.3444706 | -2.9867974 | 1.6610140  |
| H      | -6.7310536 | -0.5006942 | -1.5527470 |
| C      | 3.7847510  | -0.5267252 | -0.0348052 |
| C      | 4.8147150  | -0.1965326 | 0.8583265  |
| C      | 4.0081243  | -1.5555196 | -0.9629708 |
| C      | 6.0309828  | -0.8738379 | 0.8249372  |
| H      | 4.6516153  | 0.5832817  | 1.5933518  |
| C      | 5.2268531  | -2.2282761 | -0.9984853 |
| H      | 3.2351646  | -1.8103545 | -1.6782187 |
| C      | 6.2415569  | -1.8921356 | -0.1034680 |
| H      | 6.8120068  | -0.6093478 | 1.5287703  |
| H      | 5.3852001  | -3.0123119 | -1.7303308 |
| H      | 7.1881713  | -2.4196074 | -0.1293418 |
| H      | -7.1312826 | -2.3462625 | 0.0602288  |

|   |            |           |            |
|---|------------|-----------|------------|
| C | -0.0486406 | 4.3924432 | -0.0056861 |
| H | -0.0986125 | 5.4783577 | -0.0108937 |
| N | -1.2214314 | 3.7614491 | -0.0075917 |

**Table S4.** Cartesian Coordinates of 5j ( $S_0$ );  $E = -1682.940739$  Hartree.

| Symbol | X          | Y          | Z          |
|--------|------------|------------|------------|
| C      | 1.2080185  | 2.9825462  | 0.0127798  |
| C      | -0.0242317 | 2.2839389  | -0.0057320 |
| C      | -1.2654965 | 2.9687837  | -0.0099065 |
| C      | -1.1896311 | 4.3631177  | 0.0039871  |
| C      | 2.4135044  | 2.2183946  | 0.0029616  |
| C      | -0.0171840 | 0.8845517  | -0.0209353 |
| C      | 1.1726849  | 0.1613230  | -0.0491002 |
| C      | 2.4372891  | 0.8305773  | -0.0303041 |
| C      | -0.9211316 | -1.2392925 | -0.0362299 |
| C      | -1.2204345 | 0.1047442  | -0.0067135 |
| C      | -2.4977393 | 0.8110138  | 0.0041170  |
| C      | -2.4781564 | 2.1854627  | -0.0073919 |
| H      | -3.4203312 | 2.7216483  | 0.0228918  |
| H      | 3.3463157  | 2.7693183  | -0.0056940 |
| H      | -2.0837136 | 4.9757931  | 0.0024155  |
| H      | -1.5937605 | -2.0816863 | -0.0638367 |
| S      | 0.7893079  | -1.5487473 | -0.0525172 |
| C      | 3.7234422  | 0.0958593  | -0.0364360 |
| C      | 3.9519781  | -1.0033044 | -0.8779586 |
| C      | 4.7849140  | 0.4894921  | 0.7928121  |
| C      | 5.1680697  | -1.6707447 | -0.9010969 |
| H      | 3.1745836  | -1.3332273 | -1.5573982 |
| C      | 6.0049290  | -0.1690444 | 0.7885898  |
| H      | 4.6444810  | 1.3184460  | 1.4777365  |
| C      | 6.2413504  | -1.2680823 | -0.0717845 |
| H      | 5.2845604  | -2.5056354 | -1.5775862 |
| H      | 6.7759400  | 0.1688429  | 1.4666036  |
| C      | -3.7806118 | 0.0744126  | 0.0209880  |
| C      | -4.8507979 | 0.4617074  | -0.8005869 |
| C      | -4.0021724 | -1.0182167 | 0.8744317  |
| C      | -6.0712753 | -0.1957939 | -0.7792133 |
| H      | -4.7155226 | 1.2831009  | -1.4957410 |
| C      | -5.2191640 | -1.6819834 | 0.9173617  |
| H      | -3.2164728 | -1.3410767 | 1.5475423  |
| C      | -6.3002585 | -1.2863902 | 0.0938172  |
| H      | -6.8480062 | 0.1353119  | -1.4540637 |
| H      | -5.3310481 | -2.5090911 | 1.6042334  |
| N      | -7.5181903 | -1.9279985 | 0.1447976  |
| N      | 7.4602854  | -1.9103404 | -0.1059338 |
| C      | 8.4859646  | -1.5734682 | 0.8710292  |
| H      | 8.1786184  | -1.8007857 | 1.9011362  |
| H      | 9.3862404  | -2.1439622 | 0.6502171  |
| H      | 8.7461175  | -0.5122563 | 0.8205124  |
| C      | -7.6625355 | -3.1513629 | 0.9212942  |
| H      | -8.6961884 | -3.4870362 | 0.8640920  |
| H      | -7.0169894 | -3.9606889 | 0.5540119  |
| H      | -7.4274443 | -2.9816512 | 1.9761978  |
| C      | -8.5581445 | -1.5910417 | -0.8169135 |
| H      | -9.4560056 | -2.1592697 | -0.5812261 |

|   |            |            |            |
|---|------------|------------|------------|
| H | -8.8150709 | -0.5290442 | -0.7648839 |
| H | -8.2669062 | -1.8213576 | -1.8509257 |
| C | 7.6094170  | -3.1423731 | -0.8675387 |
| H | 7.3776491  | -2.9846855 | -1.9249344 |
| H | 8.6436815  | -3.4750929 | -0.8033963 |
| H | 6.9641672  | -3.9491631 | -0.4937079 |
| N | 1.2452016  | 4.3410537  | 0.0255014  |
| C | 0.0736322  | 4.9756049  | 0.0210189  |
| H | 0.1277269  | 6.0616118  | 0.0314450  |

**Table S5.** Cartesian Coordinates of  $5j$  ( $S_1$ );  $E = -1682.569246$  Hartree.

| Symbol | X          | Y          | Z          |
|--------|------------|------------|------------|
| C      | 1.1808724  | 2.9606485  | 0.0324427  |
| C      | -0.0538477 | 2.2387685  | -0.0127236 |
| C      | -1.3082469 | 2.9231693  | -0.0087534 |
| C      | -1.2421026 | 4.3459387  | 0.0414448  |
| C      | 2.3867821  | 2.2123220  | 0.0164656  |
| C      | -0.0282972 | 0.8343401  | -0.0665001 |
| C      | 1.1852074  | 0.1240253  | -0.1054450 |
| C      | 2.4269585  | 0.8076236  | -0.0535638 |
| C      | -0.9029300 | -1.3269540 | -0.1234949 |
| C      | -1.2226846 | 0.0293858  | -0.0771384 |
| C      | -2.4852351 | 0.7297866  | -0.0741790 |
| C      | -2.4879172 | 2.1399486  | -0.0619631 |
| H      | -3.4433772 | 2.6587478  | -0.0425062 |
| H      | 3.3200352  | 2.7685322  | 0.0271168  |
| H      | -2.1473334 | 4.9478941  | 0.0476871  |
| H      | -1.5582143 | -2.1826495 | -0.1960035 |
| S      | 0.8376229  | -1.6130678 | -0.1476597 |
| C      | 3.7324059  | 0.1038030  | -0.0490706 |
| C      | 4.0008827  | -0.9978611 | -0.8825102 |
| C      | 4.7818032  | 0.5261105  | 0.7898834  |
| C      | 5.2376235  | -1.6373132 | -0.8905799 |
| H      | 3.2353538  | -1.3561754 | -1.5653495 |
| C      | 6.0227325  | -0.1030619 | 0.8003964  |
| H      | 4.6163269  | 1.3568209  | 1.4712202  |
| C      | 6.2954867  | -1.2019544 | -0.0535238 |
| H      | 5.3786436  | -2.4761791 | -1.5619862 |
| H      | 6.7792394  | 0.2613830  | 1.4854294  |
| C      | -3.7783952 | 0.0294440  | -0.0301049 |
| C      | -4.9067864 | 0.5178687  | -0.7430028 |
| C      | -3.9712572 | -1.1432016 | 0.7462305  |
| C      | -6.1330066 | -0.1122523 | -0.6966130 |
| H      | -4.7992046 | 1.4017344  | -1.3634554 |
| C      | -5.1897813 | -1.7876164 | 0.8097449  |
| H      | -3.1455967 | -1.5311874 | 1.3323402  |
| C      | -6.3165598 | -1.2945515 | 0.0834352  |
| H      | -6.9547948 | 0.2998599  | -1.2686372 |
| H      | -5.2822647 | -2.6710648 | 1.4288970  |
| N      | -7.5225427 | -1.9270747 | 0.1361644  |
| N      | 7.5388612  | -1.8134466 | -0.0766219 |
| C      | 8.5205814  | -1.4804626 | 0.9476296  |
| H      | 8.1752718  | -1.7387815 | 1.9616652  |
| H      | 9.4422827  | -2.0293638 | 0.7478556  |
| H      | 8.7602882  | -0.4114424 | 0.9288834  |
| C      | -7.7003162 | -3.1316151 | 0.9495009  |



|   |            |            |            |
|---|------------|------------|------------|
| H | -8.7267826 | -3.4787556 | 0.8491714  |
| H | -7.0271846 | -3.9285860 | 0.6153117  |
| H | -7.5037937 | -2.9198411 | 2.0063586  |
| C | -8.6709769 | -1.4103976 | -0.6106936 |
| H | -9.5262671 | -2.0617160 | -0.4415134 |
| H | -8.9291989 | -0.3993344 | -0.2764098 |
| H | -8.4561889 | -1.3859891 | -1.6845500 |
| C | 7.7069448  | -3.0682894 | -0.7982408 |
| H | 7.4635556  | -2.9465647 | -1.8596635 |
| H | 8.7510091  | -3.3785011 | -0.7322567 |
| H | 7.0775602  | -3.8758539 | -0.3908748 |
| N | 1.2016799  | 4.3295033  | 0.0793880  |
| C | 0.0059525  | 4.9584177  | 0.0800146  |
| H | 0.0573227  | 6.0468059  | 0.1167837  |

**Table S6.** Cartesian Coordinates of **6a** ( $S_0$ );  $E = -1414.931641$  Hartree.

| Symbol | X          | Y          | Z          |
|--------|------------|------------|------------|
| C      | -1.2773947 | 2.3791593  | -0.0087608 |
| C      | -0.0310260 | 1.6997763  | -0.0064725 |
| C      | 1.1941508  | 2.4078591  | 0.0037339  |
| C      | 1.0855970  | 3.8154910  | 0.0085400  |
| C      | -2.4851140 | 1.5803552  | -0.0038227 |
| C      | -0.0192302 | 0.3005626  | -0.0142485 |
| C      | -1.2135226 | -0.4892374 | 0.0044443  |
| C      | -2.4920786 | 0.2100682  | 0.0119463  |
| C      | 1.1761890  | -0.4141400 | -0.0401282 |
| C      | 2.4304107  | 0.2688390  | -0.0263938 |
| C      | 2.4072666  | 1.6552197  | -0.0006593 |
| H      | 3.3489088  | 2.1921631  | -0.0099175 |
| H      | -3.4211810 | 2.1260664  | 0.0164453  |
| H      | 1.9688315  | 4.4434352  | 0.0146118  |
| C      | -3.7748164 | -0.5392509 | 0.0350593  |
| C      | -3.9916776 | -1.5780394 | 0.9535946  |
| C      | -4.8106488 | -0.2022414 | -0.8488266 |
| C      | -5.2086816 | -2.2541566 | 0.9884690  |
| H      | -3.2150842 | -1.8382171 | 1.6629981  |
| C      | -6.0254277 | -0.8820637 | -0.8157307 |
| H      | -4.6534336 | 0.5864582  | -1.5755673 |
| C      | -6.2289857 | -1.9109292 | 0.1026656  |
| H      | -5.3613450 | -3.0460416 | 1.7130941  |
| H      | -6.8110325 | -0.6111915 | -1.5120387 |
| C      | 3.7244255  | -0.4630547 | -0.0330715 |
| C      | 4.7373897  | -0.1173765 | 0.8733016  |
| C      | 3.9692459  | -1.4947515 | -0.9514873 |
| C      | 5.9590183  | -0.7851307 | 0.8626724  |
| H      | 4.5571069  | 0.6665724  | 1.5997623  |
| C      | 5.1932807  | -2.1592907 | -0.9628130 |
| H      | 3.2119420  | -1.7596734 | -1.6797582 |
| C      | 6.1911200  | -1.8086442 | -0.0550954 |
| H      | 6.7275045  | -0.5095151 | 1.5758804  |
| H      | 5.3687367  | -2.9469430 | -1.6866722 |
| H      | 7.1421678  | -2.3286092 | -0.0628822 |
| H      | -7.1744242 | -2.4405732 | 0.1280920  |
| C      | -0.1759583 | 4.3920480  | 0.0043038  |
| H      | -0.2664277 | 5.4745130  | 0.0075797  |
| N      | -1.3452022 | 3.7163290  | -0.0034681 |

|          |            |            |            |
|----------|------------|------------|------------|
| <b>C</b> | -0.9017110 | -1.8311222 | -0.0147186 |
| <b>H</b> | -1.5678489 | -2.6793685 | -0.0297162 |
| <b>S</b> | 0.8106918  | -2.1264422 | -0.0335404 |

S<sub>0</sub> 8a

E = -1568.607280 Hartree

*Table S7. Cartesian Coordinates of 8a (S<sub>0</sub>); E = -1568.607280 Hartree.*

| <b>Symbol</b> | <b>X</b>   | <b>Y</b>   | <b>Z</b>   |
|---------------|------------|------------|------------|
| <b>C</b>      | -1.0199210 | 1.9244626  | -0.0030064 |
| <b>C</b>      | 0.0673215  | 0.9965080  | 0.0084341  |
| <b>C</b>      | 1.4061474  | 1.4226629  | 0.0102884  |
| <b>C</b>      | -2.3557562 | 1.3957502  | 0.0015476  |
| <b>C</b>      | -0.2189362 | -0.3787578 | 0.0161272  |
| <b>C</b>      | -1.5237626 | -0.8593523 | 0.0418838  |
| <b>C</b>      | -2.6367146 | 0.0452023  | 0.0279369  |
| <b>C</b>      | 0.2461621  | -2.6447089 | 0.0133432  |
| <b>C</b>      | 0.8028892  | -1.3802235 | -0.0048400 |
| <b>C</b>      | 2.1828023  | -0.9359706 | -0.0132383 |
| <b>C</b>      | 2.4364223  | 0.4155850  | 0.0034064  |
| <b>H</b>      | 3.4706036  | 0.7336288  | -0.0212887 |
| <b>H</b>      | -3.1656037 | 2.1149639  | 0.0094419  |
| <b>H</b>      | 0.7420577  | -3.6021724 | 0.0291814  |
| <b>S</b>      | -1.4846023 | -2.6054638 | 0.0315505  |
| <b>C</b>      | -4.0419585 | -0.4385114 | 0.0349690  |
| <b>C</b>      | -4.4681486 | -1.4187694 | 0.9437124  |
| <b>C</b>      | -4.9786549 | 0.0949991  | -0.8625351 |
| <b>C</b>      | -5.7923148 | -1.8505382 | 0.9540137  |
| <b>H</b>      | -3.7702084 | -1.8248948 | 1.6661760  |
| <b>C</b>      | -6.3010138 | -0.3400947 | -0.8528644 |
| <b>H</b>      | -4.6618758 | 0.8413409  | -1.5818275 |
| <b>C</b>      | -6.7127823 | -1.3149422 | 0.0549016  |
| <b>H</b>      | -6.1052574 | -2.6011948 | 1.6708009  |
| <b>H</b>      | -7.0085537 | 0.0786832  | -1.5594672 |
| <b>C</b>      | 3.3039105  | -1.9098922 | -0.0379626 |
| <b>C</b>      | 4.3776858  | -1.7793866 | 0.8554462  |
| <b>C</b>      | 3.3287803  | -2.9636415 | -0.9647823 |
| <b>C</b>      | 5.4433179  | -2.6750345 | 0.8241297  |
| <b>H</b>      | 4.3649845  | -0.9827711 | 1.5904369  |
| <b>C</b>      | 4.3980413  | -3.8550514 | -0.9983265 |
| <b>H</b>      | 2.5214895  | -3.0683978 | -1.6798974 |
| <b>C</b>      | 5.4576491  | -3.7160272 | -0.1028953 |
| <b>H</b>      | 6.2597864  | -2.5625130 | 1.5284340  |
| <b>H</b>      | 4.4054640  | -4.6556829 | -1.7292519 |
| <b>H</b>      | 6.2872028  | -4.4132901 | -0.1274807 |
| <b>H</b>      | -7.7423025 | -1.6539858 | 0.0616818  |
| <b>N</b>      | -0.8175171 | 3.2443576  | -0.0091814 |
| <b>C</b>      | 2.9108046  | 3.4367818  | 0.0108363  |
| <b>H</b>      | 3.7937466  | 2.8100313  | 0.0205617  |
| <b>C</b>      | 3.0577876  | 4.8021708  | 0.0055531  |
| <b>H</b>      | 4.0492206  | 5.2398722  | 0.0099245  |
| <b>C</b>      | 1.9186799  | 5.6442992  | -0.0056953 |
| <b>H</b>      | 2.0477522  | 6.7206644  | -0.0099955 |
| <b>C</b>      | 0.6598399  | 5.1026272  | -0.0105879 |
| <b>H</b>      | -0.2266626 | 5.7253953  | -0.0185332 |
| <b>C</b>      | 0.4630468  | 3.6911520  | -0.0049862 |
| <b>C</b>      | 1.6244106  | 2.8349082  | 0.0052847  |

**Table S8.** Cartesian Coordinates of **8a** ( $S_0$ );  $E = -1836.616606$  Hartree.

| Symbol | X          | Y          | Z          |
|--------|------------|------------|------------|
| C      | 1.2103569  | 2.4214262  | 0.0098238  |
| C      | 0.0068317  | 1.6508352  | -0.0141015 |
| C      | -1.2627729 | 2.2535234  | -0.0192990 |
| C      | 2.4600766  | 1.7166190  | 0.0017346  |
| C      | 0.1029578  | 0.2493733  | -0.0311412 |
| C      | 1.3315455  | -0.4030595 | -0.0597329 |
| C      | 2.5618072  | 0.3381366  | -0.0356792 |
| C      | -0.6666898 | -1.9311304 | -0.0482720 |
| C      | -1.0475939 | -0.6034221 | -0.0174697 |
| C      | -2.3591239 | 0.0212422  | -0.0036480 |
| C      | -2.4191860 | 1.3985983  | -0.0148033 |
| H      | -3.3986078 | 1.8573952  | 0.0223019  |
| H      | 3.3591229  | 2.3208854  | -0.0035328 |
| H      | -1.2864397 | -2.8127998 | -0.0785767 |
| S      | 1.0534095  | -2.1281801 | -0.0631056 |
| C      | 3.8848993  | -0.3254765 | -0.0382382 |
| C      | 4.1757005  | -1.4129948 | -0.8761954 |
| C      | 4.9218610  | 0.1294497  | 0.7913323  |
| C      | 5.4269362  | -2.0116547 | -0.8954323 |
| H      | 3.4198986  | -1.7868303 | -1.5571868 |
| C      | 6.1761619  | -0.4602203 | 0.7913803  |
| H      | 4.7339966  | 0.9510745  | 1.4736145  |
| C      | 6.4746298  | -1.5476171 | -0.0650095 |
| H      | 5.5916179  | -2.8399881 | -1.5699677 |
| H      | 6.9260878  | -0.0780616 | 1.4695940  |
| C      | -3.5979065 | -0.7849800 | 0.0193161  |
| C      | -4.6972583 | -0.4515984 | -0.7880571 |
| C      | -3.7488804 | -1.8966571 | 0.8641269  |
| C      | -5.8770519 | -1.1788086 | -0.7633092 |
| H      | -4.6169309 | 0.3824409  | -1.4766752 |
| C      | -4.9249178 | -2.6296862 | 0.9109888  |
| H      | -2.9404060 | -2.1796434 | 1.5280677  |
| C      | -6.0340978 | -2.2905733 | 0.0992524  |
| H      | -6.6776865 | -0.8860957 | -1.4279563 |
| H      | -4.9827041 | -3.4672751 | 1.5919588  |
| N      | -7.2101643 | -3.0043357 | 0.1504679  |
| N      | 7.7261039  | -2.1216352 | -0.0936968 |
| C      | 8.7355445  | -1.7134481 | 0.8729896  |
| H      | 8.4426128  | -1.9378909 | 1.9076839  |
| H      | 9.6637373  | -2.2402735 | 0.6600181  |
| H      | 8.9394939  | -0.6409001 | 0.8027640  |
| C      | -7.2788199 | -4.2382138 | 0.9206194  |
| H      | -8.2890774 | -4.6380597 | 0.8593335  |
| H      | -6.5832070 | -5.0029667 | 0.5497737  |
| H      | -7.0562172 | -4.0601822 | 1.9769952  |
| C      | -8.2791229 | -2.7150340 | -0.7948554 |
| H      | -9.1373123 | -3.3423070 | -0.5616019 |
| H      | -8.6008880 | -1.6720563 | -0.7212376 |
| H      | -7.9844393 | -2.9084390 | -1.8352481 |
| C      | 7.9492437  | -3.3393417 | -0.8602094 |
| H      | 7.7187018  | -3.1892766 | -1.9191998 |
| H      | 8.9991335  | -3.6163477 | -0.7874952 |
| H      | 7.3450549  | -4.1811895 | -0.4958774 |
| N      | 1.1891344  | 3.7582362  | 0.0256817  |
| C      | -2.4784862 | 4.4549587  | -0.0182073 |

|   |            |           |            |
|---|------------|-----------|------------|
| H | -3.4381216 | 3.9534532 | -0.0411355 |
| C | -1.2861579 | 3.6840242 | -0.0068142 |
| C | -0.0195260 | 4.3738547 | 0.0170532  |
| C | -0.0244039 | 5.7991065 | 0.0321552  |
| H | 0.9383803  | 6.2959802 | 0.0508498  |
| C | -1.1980850 | 6.5073731 | 0.0226271  |
| H | -1.1793071 | 7.5913802 | 0.0343095  |
| C | -2.4405947 | 5.8282356 | -0.0039015 |
| H | -3.3638256 | 6.3959568 | -0.0131944 |

**Table S92.** Cartesian Coordinates of **8c** ( $S_1$ );  $E = -1836.226094$  Hartree.

| Symbol | X          | Y          | Z          |
|--------|------------|------------|------------|
| C      | 1.1834763  | 2.4013268  | 0.0033256  |
| C      | -0.0109990 | 1.6095913  | -0.0408727 |
| C      | -1.3015393 | 2.2121705  | -0.0469283 |
| C      | 2.4354336  | 1.7233640  | -0.0049537 |
| C      | 0.1056641  | 0.2113367  | -0.0838167 |
| C      | 1.3594086  | -0.4262423 | -0.1156964 |
| C      | 2.5617127  | 0.3270502  | -0.0672061 |
| C      | -0.6293050 | -1.9975086 | -0.1493782 |
| C      | -1.0332664 | -0.6687009 | -0.0971812 |
| C      | -2.3424139 | -0.0527640 | -0.0919347 |
| C      | -2.4233765 | 1.3541607  | -0.0913949 |
| H      | -3.4142887 | 1.7954813  | -0.0707715 |
| H      | 3.3321681  | 2.3365182  | 0.0066841  |
| H      | -1.2323613 | -2.8912077 | -0.2222656 |
| S      | 1.1183126  | -2.1782940 | -0.1594001 |
| C      | 3.9058637  | -0.3008525 | -0.0585620 |
| C      | 4.2462506  | -1.3710258 | -0.9050490 |
| C      | 4.9175808  | 0.1671755  | 0.8002788  |
| C      | 5.5180482  | -1.9396386 | -0.9049947 |
| H      | 3.5117651  | -1.7609519 | -1.6048292 |
| C      | 6.1924009  | -0.3917137 | 0.8182351  |
| H      | 4.6964352  | 0.9761049  | 1.4921975  |
| C      | 6.5387674  | -1.4585613 | -0.0482516 |
| H      | 5.7142410  | -2.7581293 | -1.5876391 |
| H      | 6.9172745  | 0.0048947  | 1.5194290  |
| C      | -3.5852520 | -0.8307286 | -0.0379070 |
| C      | -4.7537362 | -0.4085505 | -0.7266432 |
| C      | -3.6933206 | -2.0212088 | 0.7266569  |
| C      | -5.9358783 | -1.1193714 | -0.6730522 |
| H      | -4.7144278 | 0.4838579  | -1.3435678 |
| C      | -4.8689706 | -2.7417596 | 0.8015821  |
| H      | -2.8408081 | -2.3594452 | 1.3053047  |
| C      | -6.0343970 | -2.3182498 | 0.0952036  |
| H      | -6.7877606 | -0.7583884 | -1.2357900 |
| H      | -4.8969251 | -3.6302005 | 1.4201445  |
| N      | -7.1972155 | -3.0287802 | 0.1554637  |
| N      | 7.8189720  | -1.9959580 | -0.0668942 |
| C      | 8.7511738  | -1.6454099 | 0.9975056  |
| H      | 8.3959076  | -1.9599892 | 1.9925851  |
| H      | 9.7089302  | -2.1317214 | 0.8041555  |
| H      | 8.9286713  | -0.5647955 | 1.0224536  |
| C      | -7.2785240 | -4.2603190 | 0.9409540  |
| H      | -8.2752823 | -4.6845173 | 0.8329000  |
| H      | -6.5470023 | -4.9969327 | 0.5900205  |

|   |            |            |            |
|---|------------|------------|------------|
| H | -7.0980078 | -4.0612201 | 2.0040259  |
| C | -8.3898215 | -2.5676291 | -0.5553913 |
| H | -9.2073668 | -3.2605104 | -0.3636442 |
| H | -8.6898512 | -1.5711309 | -0.2113959 |
| H | -8.2113251 | -2.5296532 | -1.6363325 |
| C | 8.0520086  | -3.2487605 | -0.7746726 |
| H | 7.8058514  | -3.1501097 | -1.8375234 |
| H | 9.1109398  | -3.5036709 | -0.7046891 |
| H | 7.4643331  | -4.0846659 | -0.3608985 |
| N | 1.1348764  | 3.7546487  | 0.0414927  |
| C | -2.5386594 | 4.4159494  | 0.0021408  |
| H | -3.4971994 | 3.9045700  | -0.0232449 |
| C | -1.3474517 | 3.6632543  | -0.0035624 |
| C | -0.0836268 | 4.3643727  | 0.0356832  |
| C | -0.1059236 | 5.7882696  | 0.0730065  |
| H | 0.8513272  | 6.3025963  | 0.0979009  |
| C | -1.2974411 | 6.4969549  | 0.0758888  |
| H | -1.2827777 | 7.5838575  | 0.1050523  |
| C | -2.5254181 | 5.8094998  | 0.0410961  |
| H | -3.4627014 | 6.3598006  | 0.0450547  |

## TD-DFT

**Table S3.** Calculated TD-DFT transitions of compound **5a** at B3LYP/6-311+G(d,p) level (IEFPCM).

| S <sub>n</sub> | E (eV) | λ (nm) | f      | Configuration | CI coefficient |
|----------------|--------|--------|--------|---------------|----------------|
| S <sub>1</sub> | 3.20   | 388    | 0.3528 | HOMO → LUMO   | 0.68891        |
| S <sub>2</sub> | 3.60   | 345    | 0.2218 | HOMO-1 → LUMO | 0.67451        |
|                |        |        |        | HOMO → LUMO+1 | 0.13125        |
|                |        |        |        | HOMO → LUMO+2 | -0.11053       |
| S <sub>3</sub> | 3.82   | 324    | 0.0380 | HOMO-2 → LUMO | 0.65661        |
|                |        |        |        | HOMO → LUMO+1 | 0.16623        |
|                |        |        |        | HOMO → LUMO+2 | -0.15601       |
| S <sub>4</sub> | 3.92   | 316    | 0.1430 | HOMO-2 → LUMO | -0.14585       |
|                |        |        |        | HOMO-1 → LUMO | -0.12676       |
|                |        |        |        | HOMO → LUMO+1 | 0.66034        |
| S <sub>5</sub> | 4.05   | 306    | 0.0013 | HOMO-6 → LUMO | 0.65316        |
|                |        |        |        | HOMO-4 → LUMO | 0.14826        |

**Table S4.** Calculated TD-DFT transitions of compound **5j** at B3LYP/6-311+G(d,p) level (IEFPCM).

| <b>S<sub>n</sub></b> | <b>E (eV)</b> | <b>λ (nm)</b> | <b>f</b> | <b>Configuration</b> | <b>CI coefficient</b> |
|----------------------|---------------|---------------|----------|----------------------|-----------------------|
| S <sub>1</sub>       | 2.62          | 473           | 0.2852   | HOMO-1 → LUMO        | 0.68233               |
|                      |               |               |          | HOMO → LUMO          | 0.17529               |
| S <sub>2</sub>       | 2.71          | 458           | 0.1898   | HOMO-1 → LUMO        | -0.17193              |
|                      |               |               |          | HOMO → LUMO          | 0.67535               |
| S <sub>3</sub>       | 3.33          | 372           | 0.1722   | HOMO-2 → LUMO        | 0.68052               |
| S <sub>4</sub>       | 3.73          | 332           | 0.0693   | HOMO-3 → LUMO        | -0.40939              |
|                      |               |               |          | HOMO-2 → LUMO+1      | -0.16498              |
|                      |               |               |          | HOMO-1 → LUMO+1      | -0.10543              |
|                      |               |               |          | HOMO → LUMO+1        | 0.49767               |
|                      |               |               |          | HOMO → LUMO+2        | 0.15085               |
| S <sub>5</sub>       | 3.83          | 324           | 0.5414   | HOMO-3 → LUMO        | 0.47848               |
|                      |               |               |          | HOMO-2 → LUMO+2      | 0.10911               |
|                      |               |               |          | HOMO-1 → LUMO+2      | 0.13470               |
|                      |               |               |          | HOMO → LUMO+1        | 0.44688               |
|                      |               |               |          | HOMO → LUMO+2        | -0.13849              |
| S <sub>6</sub>       | 3.90          | 318           | 0.1326   | HOMO-1 → LUMO+1      | 0.68370               |
|                      |               |               |          | HOMO → LUMO+1        | 0.11736               |

**Table S5.** Calculated TD-DFT transitions of compound **6a** at B3LYP/6-311+G(d,p) level (IEFPCM).

| <b>S<sub>n</sub></b> | <b>E (eV)</b> | <b>λ (nm)</b> | <b>f</b> | <b>Configuration</b> | <b>CI coefficient</b> |
|----------------------|---------------|---------------|----------|----------------------|-----------------------|
| S <sub>1</sub>       | 3.20          | 387           | 0.3932   | HOMO → LUMO          | 0.69150               |
| S <sub>2</sub>       | 3.67          | 338           | 0.1155   | HOMO-1 → LUMO        | 0.60645               |
|                      |               |               |          | HOMO → LUMO+1        | 0.32022               |
| S <sub>3</sub>       | 3.82          | 324           | 0.1389   | HOMO-2 → LUMO        | -0.36545              |
|                      |               |               |          | HOMO-1 → LUMO        | -0.27906              |
|                      |               |               |          | HOMO → LUMO+1        | 0.52505               |
| S <sub>4</sub>       | 3.89          | 319           | 0.0708   | HOMO-2 → LUMO        | 0.54145               |
|                      |               |               |          | HOMO-1 → LUMO        | -0.12988              |
|                      |               |               |          | HOMO → LUMO+1        | 0.32581               |
|                      |               |               |          | HOMO → LUMO+2        | -0.25569              |
| S <sub>5</sub>       | 4.24          | 293           | 0.0036   | HOMO-6 → LUMO        | 0.67995               |
|                      |               |               |          | HOMO-5 → LUMO        | -0.10402              |
|                      |               |               |          | HOMO-4 → LUMO        | 0.11579               |
| S <sub>6</sub>       | 4.24          | 293           | 0.0036   | HOMO-3 → LUMO        | 0.66175               |
|                      |               |               |          | HOMO → LUMO+2        | 0.16156               |
|                      |               |               |          | HOMO → LUMO+5        | 0.12377               |

**Table S6.** Calculated TD-DFT transitions of compound **8a** at B3LYP/6-311+G(d,p) level (IEFPCM).

| <b>S<sub>n</sub></b> | <b>E (eV)</b> | <b>λ (nm)</b> | <b>f</b> | <b>Configuration</b> | <b>CI coefficient</b> |
|----------------------|---------------|---------------|----------|----------------------|-----------------------|
| S <sub>1</sub>       | 2.67          | 465           | 0.3557   | HOMO → LUMO          | 0.69984               |
| S <sub>2</sub>       | 3.3274        | 373           | 0.2430   | HOMO-1 → LUMO        | 0.65498               |
|                      |               |               |          | HOMO → LUMO+2        | 0.21934               |
| S <sub>3</sub>       | 3.49          | 355           | 0.0945   | HOMO-2 → LUMO        | 0.67547               |
|                      |               |               |          | HOMO → LUMO+1        | 0.10142               |
|                      |               |               |          | HOMO → LUMO+2        | -0.14747              |
| S <sub>4</sub>       | 3.68          | 337           | 0.0921   | HOMO-3 → LUMO        | 0.13734               |
|                      |               |               |          | HOMO → LUMO+1        | 0.67192               |
| S <sub>5</sub>       | 3.74          | 332           | 0.0012   | HOMO-7 → LUMO        | 0.66669               |
|                      |               |               |          | HOMO-6 → LUMO        | 0.10515               |
|                      |               |               |          | HOMO-5 → LUMO        | -0.15102              |
| S <sub>6</sub>       | 3.82          | 325           | 0.0257   | HOMO-3 → LUMO        | 0.64480               |
|                      |               |               |          | HOMO → LUMO+1        | -0.12234              |
|                      |               |               |          | HOMO → LUMO+3        | 0.19183               |

**Table S7.** Calculated TD-DFT transitions of compound **8c** at B3LYP/6-311+G(d,p) level (IEFPCM).

| <b>S<sub>n</sub></b> | <b>E (eV)</b> | <b>λ (nm)</b> | <b>f</b> | <b>Configuration</b> | <b>CI coefficient</b> |
|----------------------|---------------|---------------|----------|----------------------|-----------------------|
| S <sub>1</sub>       | 2.36          | 525           | 0.3593   | HOMO-1 → LUMO        | 0.64203               |
|                      |               |               |          | HOMO → LUMO          | -0.28976              |
| S <sub>2</sub>       | 2.40          | 517           | 0.2473   | HOMO-1 → LUMO        | 0.29078               |
|                      |               |               |          | HOMO → LUMO          | 0.63661               |
| S <sub>3</sub>       | 2.86          | 433           | 0.0779   | HOMO-2 → LUMO        | 0.69498               |
| S <sub>4</sub>       | 3.42          | 362           | 0.0901   | HOMO-3 → LUMO        | 0.61136               |
|                      |               |               |          | HOMO-2 → LUMO+2      | 0.15467               |
|                      |               |               |          | HOMO → LUMO+2        | -0.29703              |
| S <sub>5</sub>       | 3.61          | 343           | 0.2327   | HOMO-4 → LUMO        | 0.10891               |
|                      |               |               |          | HOMO-2 → LUMO+1      | -0.13716              |
|                      |               |               |          | HOMO → LUMO+1        | 0.66707               |
| S <sub>6</sub>       | 3.78          | 329           | 0.0016   | HOMO-8 → LUMO        | 0.66635               |
|                      |               |               |          | HOMO-6 → LUMO        | -0.11854              |
|                      |               |               |          | HOMO-5 → LUMO        | 0.15368               |

# $^1\text{H}$ -, $^{19}\text{F}$ -, and $^{13}\text{C}\{^1\text{H}\}$ -NMR Spectra 2,4-dichloro-3-(thiophen-3-yl)quinoline

| Parameter                | Value             |
|--------------------------|-------------------|
| 1 Solvent                | CDCl <sub>3</sub> |
| 2 Temperature            | 298.1             |
| 3 Pulse Sequence         | zg30              |
| 4 Number of Scans        | 16                |
| 5 Receiver Gain          | 101               |
| 6 Relaxation Delay       | 1.0000            |
| 7 Pulse Width            | 8.0000            |
| 8 Acquisition Time       | 3.2768            |
| 9 Spectrometer Frequency | 500.13            |
| 10 Spectral Width        | 10000.0           |
| 11 Lowest Frequency      | -1924.0           |
| 12 Nucleus               | $^1\text{H}$      |
| 13 Acquired Size         | 32768             |
| 14 Spectral Size         | 65536             |

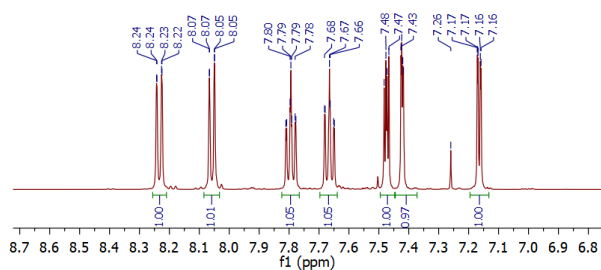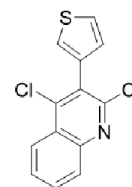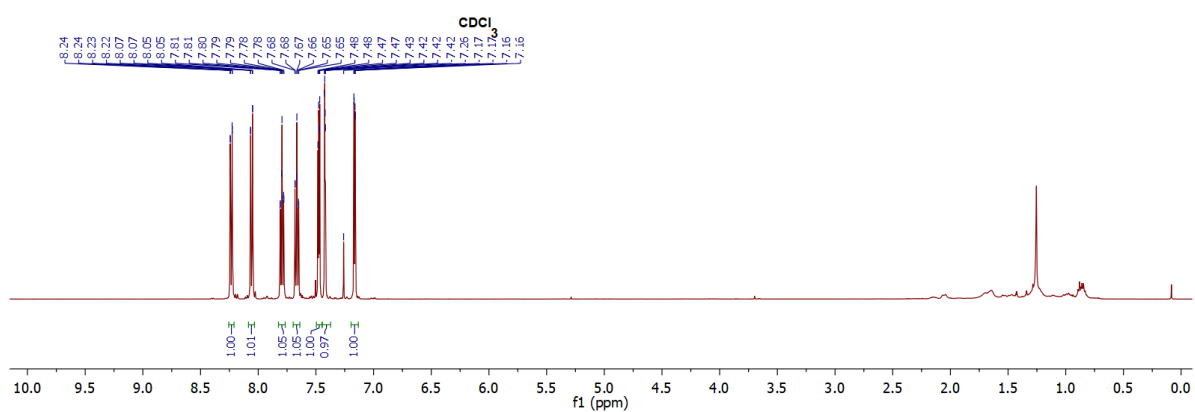

| Parameter                | Value             |
|--------------------------|-------------------|
| 1 Solvent                | CDCl <sub>3</sub> |
| 2 Temperature            | 298.1             |
| 3 Pulse Sequence         | zgpg30            |
| 4 Number of Scans        | 512               |
| 5 Receiver Gain          | 101               |
| 6 Relaxation Delay       | 2.0000            |
| 7 Pulse Width            | 10.0000           |
| 8 Acquisition Time       | 1.0879            |
| 9 Spectrometer Frequency | 125.76            |
| 10 Spectral Width        | 30120.5           |
| 11 Lowest Frequency      | -2472.6           |
| 12 Nucleus               | $^{13}\text{C}$   |
| 13 Acquired Size         | 32768             |
| 14 Spectral Size         | 32768             |

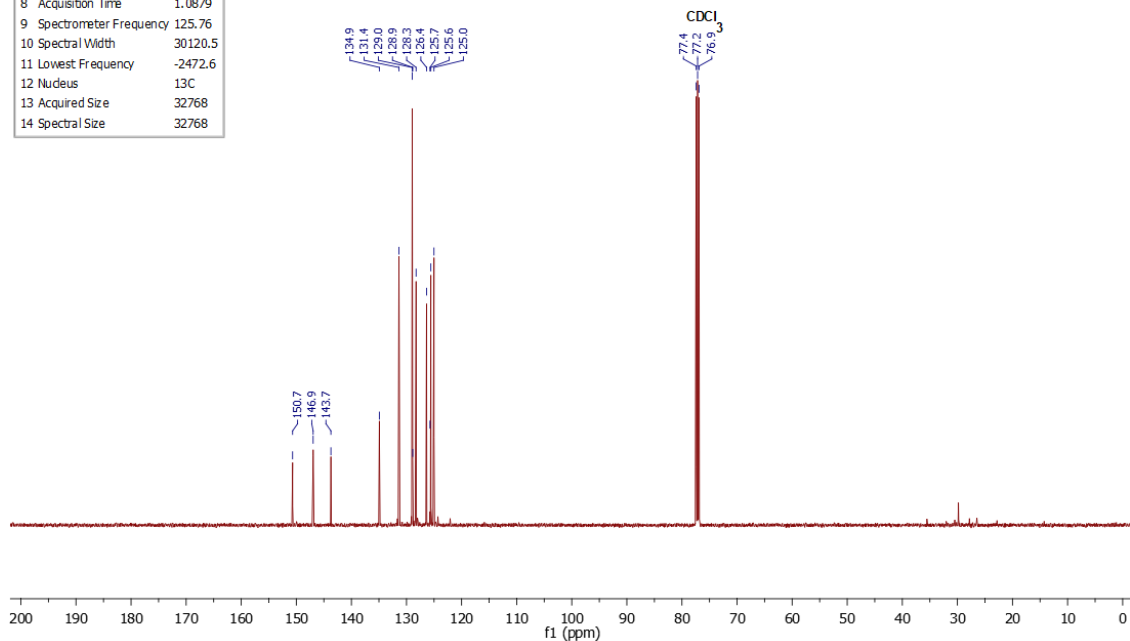





### 3-chloro-2,4-bis(thiophen-3-ylethynyl)pyridine

| Parameter                | Value             |
|--------------------------|-------------------|
| 1 Solvent                | CDCl <sub>3</sub> |
| 2 Temperature            | 298.1             |
| 3 Pulse Sequence         | zg30              |
| 4 Number of Scans        | 16                |
| 5 Receiver Gain          | 101               |
| 6 Relaxation Delay       | 1.0000            |
| 7 Pulse Width            | 8.0000            |
| 8 Acquisition Time       | 3.2768            |
| 9 Spectrometer Frequency | 500.13            |
| 10 Spectral Width        | 10000.0           |
| 11 Lowest Frequency      | -1923.6           |
| 12 Nucleus               | <sup>1</sup> H    |
| 13 Acquired Size         | 32768             |
| 14 Spectral Size         | 65536             |

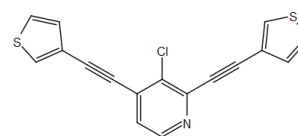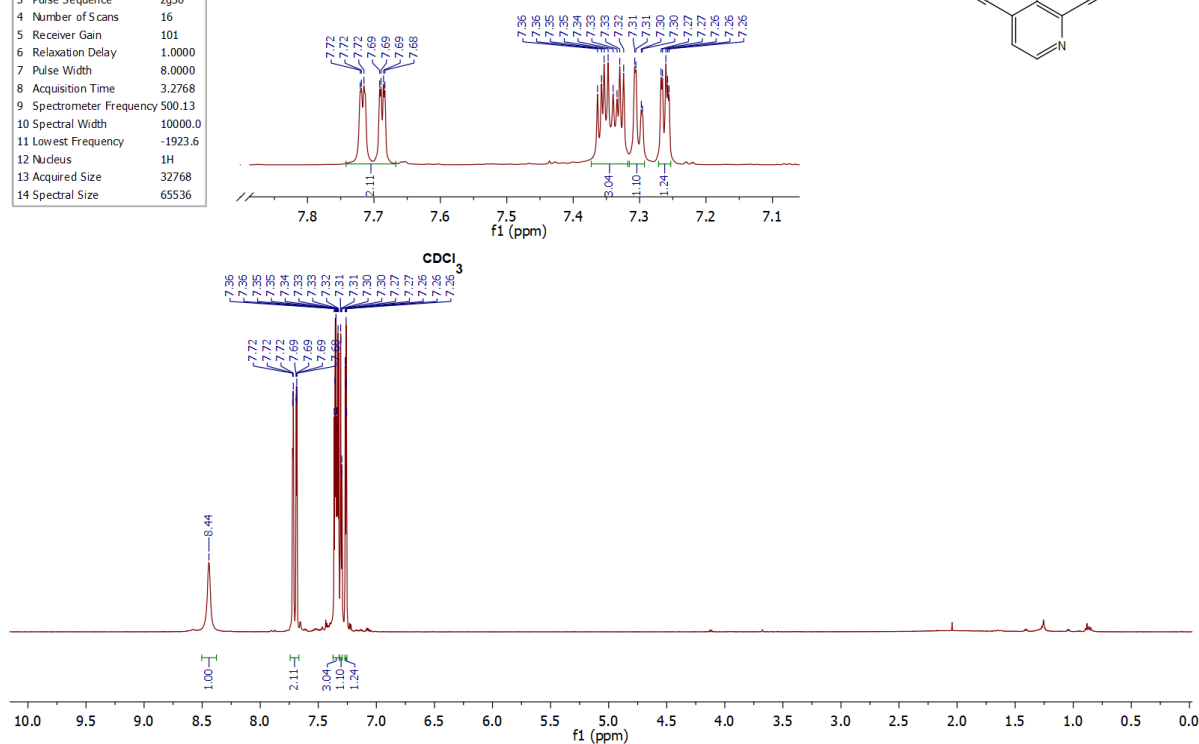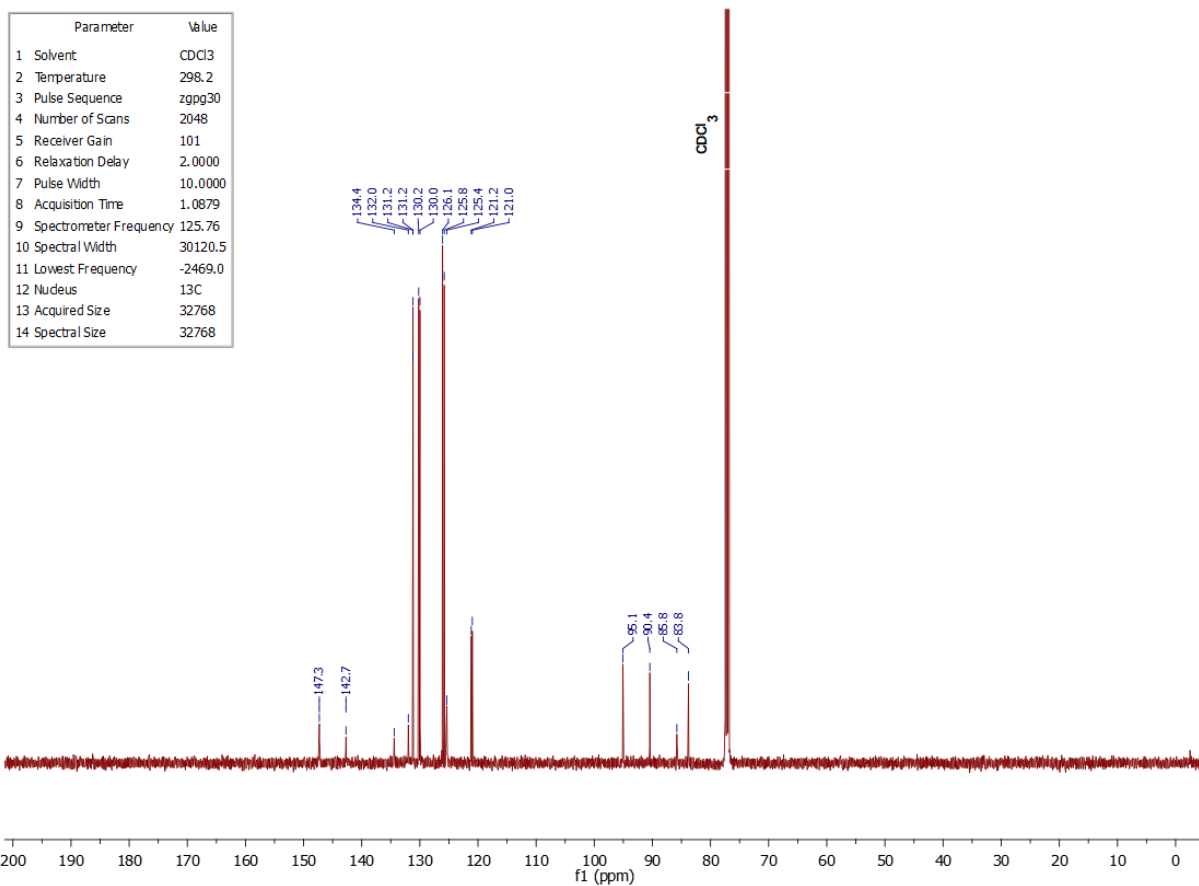

### 2,4-bis(phenylethynyl)-3-(thiophen-3-yl)pyridine (1a)



| Parameter                | Value   |
|--------------------------|---------|
| 1 Solvent                | CDCl3   |
| 2 Temperature            | 298.2   |
| 3 Pulse Sequence         | zg30    |
| 4 Number of Scans        | 16      |
| 5 Receiver Gain          | 287     |
| 6 Relaxation Delay       | 2.0000  |
| 7 Pulse Width            | 10.0000 |
| 8 Acquisition Time       | 5.2954  |
| 9 Spectrometer Frequency | 300.13  |
| 10 Spectral Width        | 6188.1  |
| 11 Lowest Frequency      | -1246.4 |
| 12 Nucleus               | 1H      |
| 13 Acquired Size         | 32768   |
| 14 Spectral Size         | 65536   |

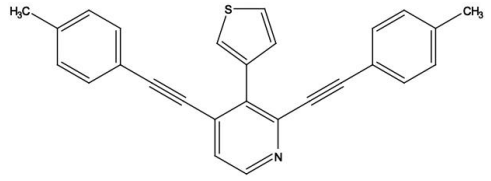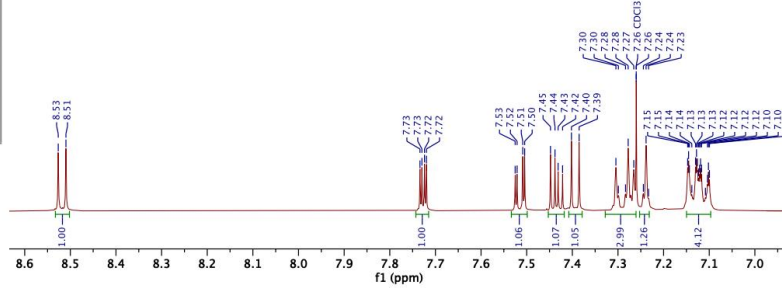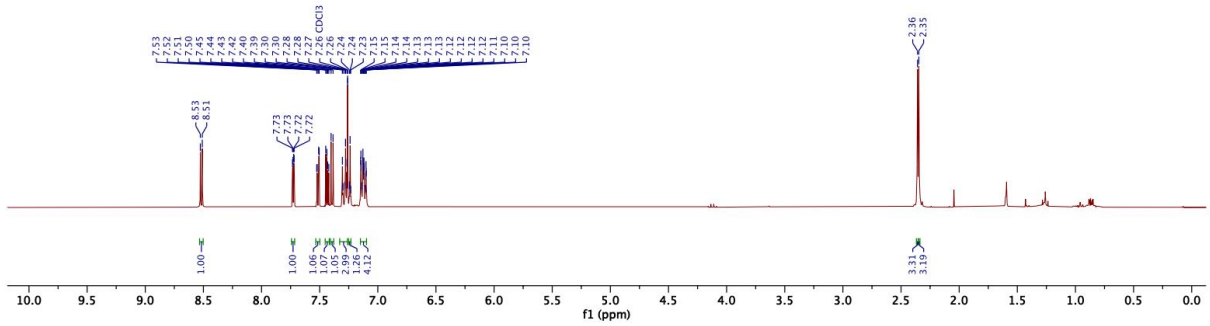

| Parameter                | Value   |
|--------------------------|---------|
| 1 Solvent                | CDCl3   |
| 2 Temperature            | 298.2   |
| 3 Pulse Sequence         | zgpg30  |
| 4 Number of Scans        | 1024    |
| 5 Receiver Gain          | 2050    |
| 6 Relaxation Delay       | 2.0000  |
| 7 Pulse Width            | 10.0000 |
| 8 Acquisition Time       | 1.8176  |
| 9 Spectrometer Frequency | 75.47   |
| 10 Spectral Width        | 18028.8 |
| 11 Lowest Frequency      | -1457.5 |
| 12 Nucleus               | 13C     |
| 13 Acquired Size         | 32768   |
| 14 Spectral Size         | 65536   |

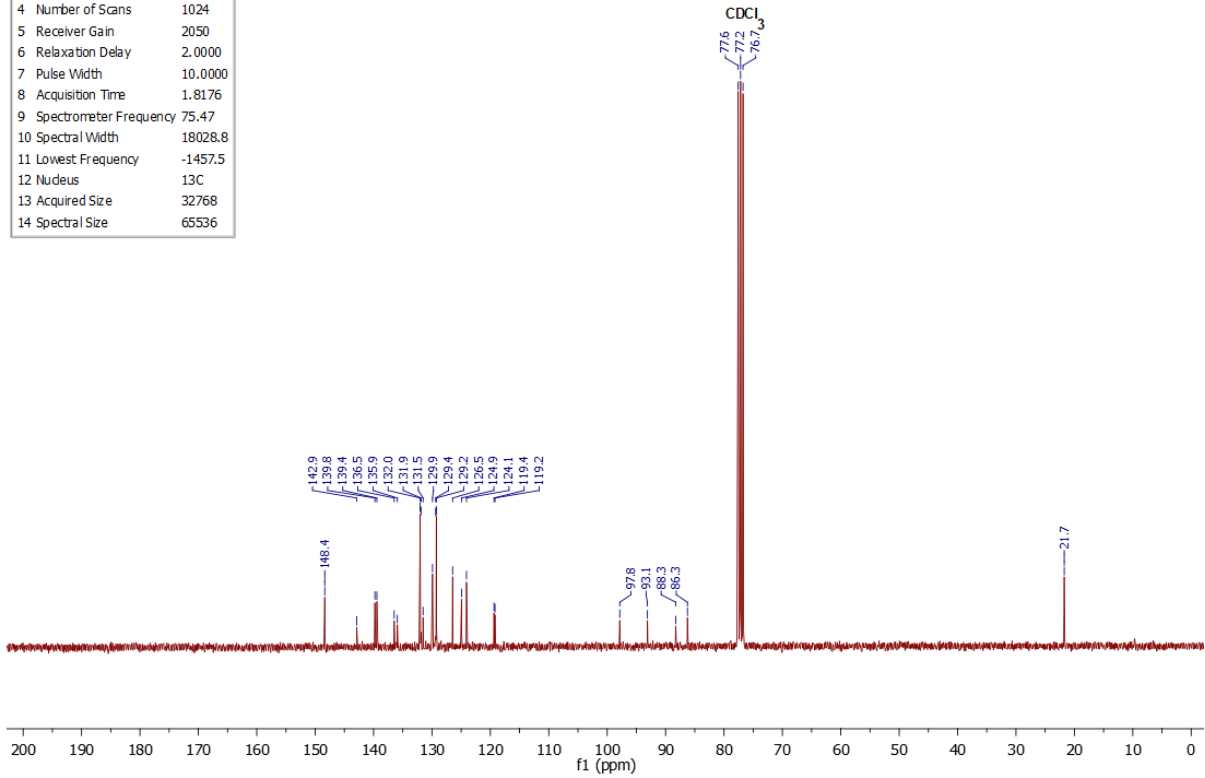

### 3-(thiophen-3-yl)-2,4-bis(*m*-tolylethynyl)pyridine (1c)

| Parameter                | Value             |
|--------------------------|-------------------|
| 1 Solvent                | CDCl <sub>3</sub> |
| 2 Temperature            | 298.2             |
| 3 Pulse Sequence         | zg30              |
| 4 Number of Scans        | 16                |
| 5 Receiver Gain          | 64                |
| 6 Relaxation Delay       | 2.0000            |
| 7 Pulse Width            | 10.0000           |
| 8 Acquisition Time       | 5.2954            |
| 9 Spectrometer Frequency | 300.13            |
| 10 Spectral Width        | 6188.1            |
| 11 Lowest Frequency      | -1246.4           |
| 12 Nucleus               | <sup>1</sup> H    |
| 13 Acquired Size         | 32768             |
| 14 Spectral Size         | 65536             |

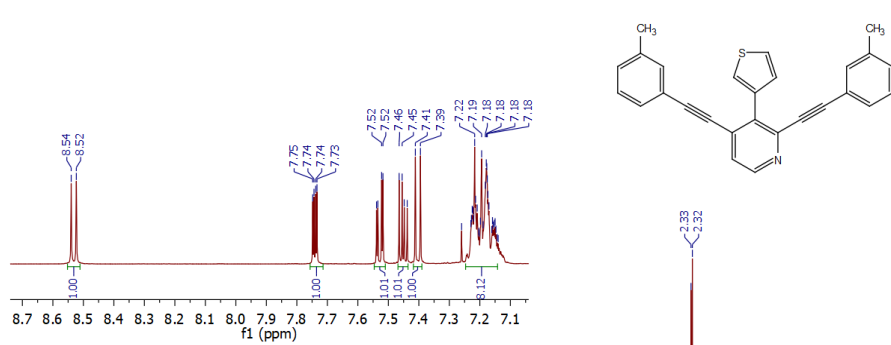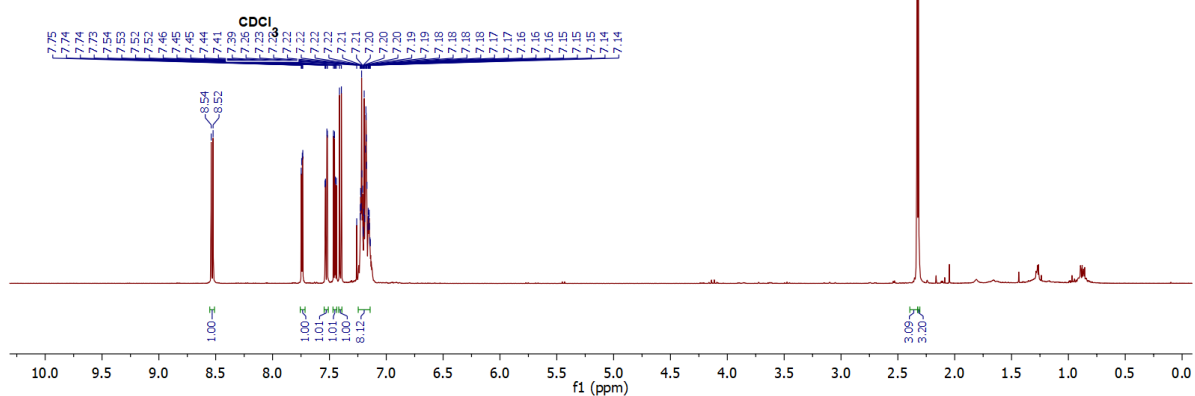

| Parameter                | Value             |
|--------------------------|-------------------|
| 1 Solvent                | CDCl <sub>3</sub> |
| 2 Temperature            | 298.2             |
| 3 Pulse Sequence         | zgpg30            |
| 4 Number of Scans        | 1024              |
| 5 Receiver Gain          | 2050              |
| 6 Relaxation Delay       | 2.0000            |
| 7 Pulse Width            | 10.0000           |
| 8 Acquisition Time       | 1.8176            |
| 9 Spectrometer Frequency | 75.47             |
| 10 Spectral Width        | 18028.8           |
| 11 Lowest Frequency      | -1462.2           |
| 12 Nucleus               | <sup>13</sup> C   |
| 13 Acquired Size         | 32768             |
| 14 Spectral Size         | 65536             |

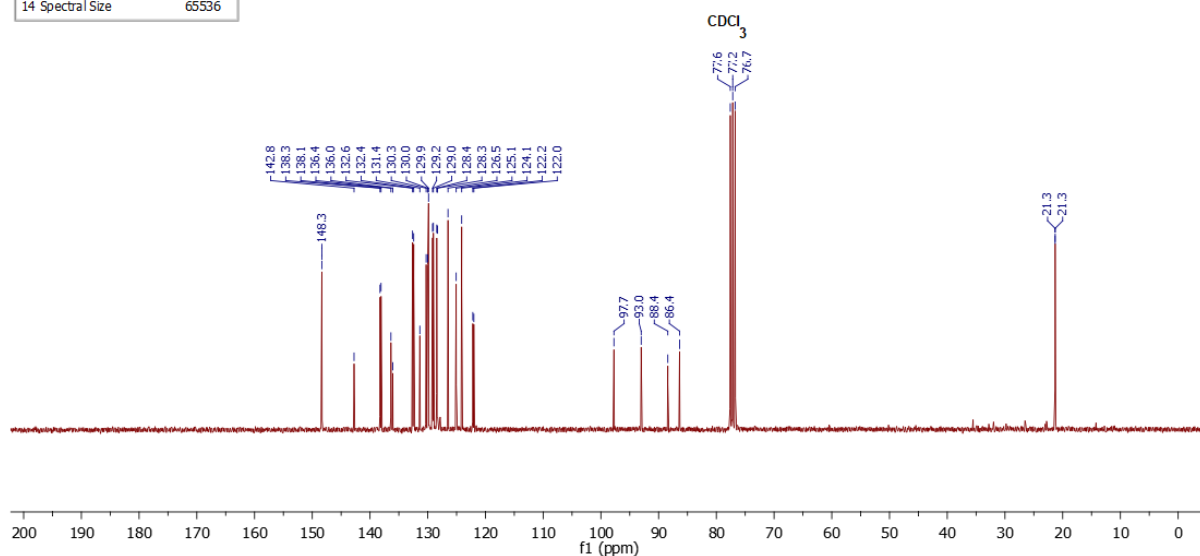

### 3-(thiophen-3-yl)-2,4-bis(*o*-tolylethynyl)pyridine (1d)

| Parameter                | Value   |
|--------------------------|---------|
| 1 Solvent                | CDCl3   |
| 2 Temperature            | 298.2   |
| 3 Pulse Sequence         | zg30    |
| 4 Number of Scans        | 16      |
| 5 Receiver Gain          | 181     |
| 6 Relaxation Delay       | 2.0000  |
| 7 Pulse Width            | 10.0000 |
| 8 Acquisition Time       | 5.2954  |
| 9 Spectrometer Frequency | 300.13  |
| 10 Spectral Width        | 6188.1  |
| 11 Lowest Frequency      | -1246.3 |
| 12 Nucleus               | 1H      |
| 13 Acquired Size         | 32768   |
| 14 Spectral Size         | 65536   |

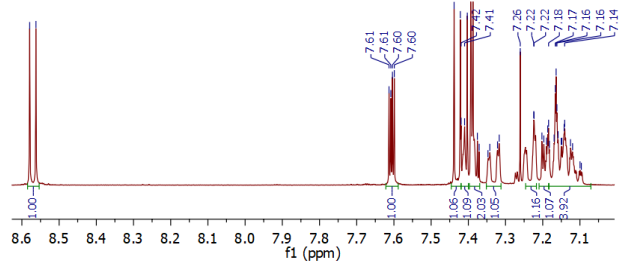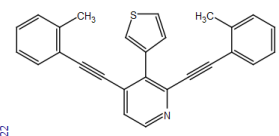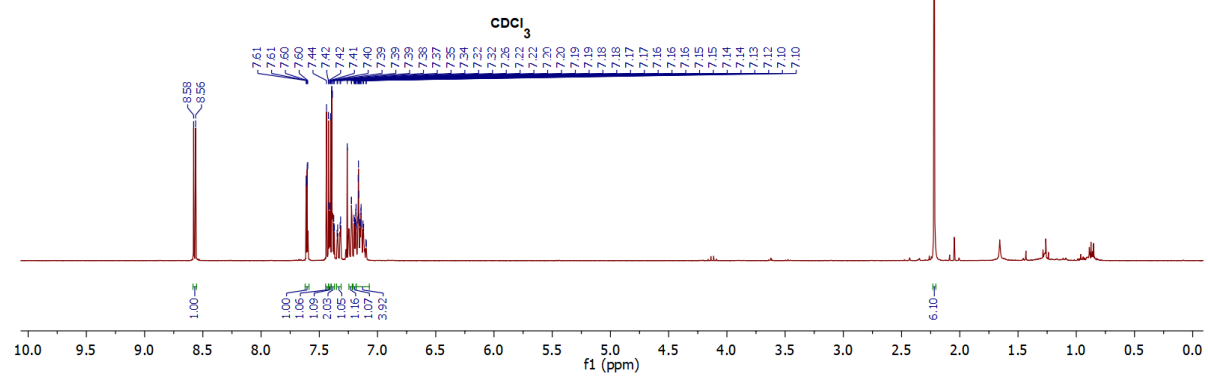

| Parameter                | Value   |
|--------------------------|---------|
| 1 Solvent                | CDCl3   |
| 2 Temperature            | 298.2   |
| 3 Pulse Sequence         | zgpg30  |
| 4 Number of Scans        | 1024    |
| 5 Receiver Gain          | 2050    |
| 6 Relaxation Delay       | 2.0000  |
| 7 Pulse Width            | 10.0000 |
| 8 Acquisition Time       | 1.8176  |
| 9 Spectrometer Frequency | 75.47   |
| 10 Spectral Width        | 18028.8 |
| 11 Lowest Frequency      | -1458.2 |
| 12 Nucleus               | 13C     |
| 13 Acquired Size         | 32768   |
| 14 Spectral Size         | 65536   |

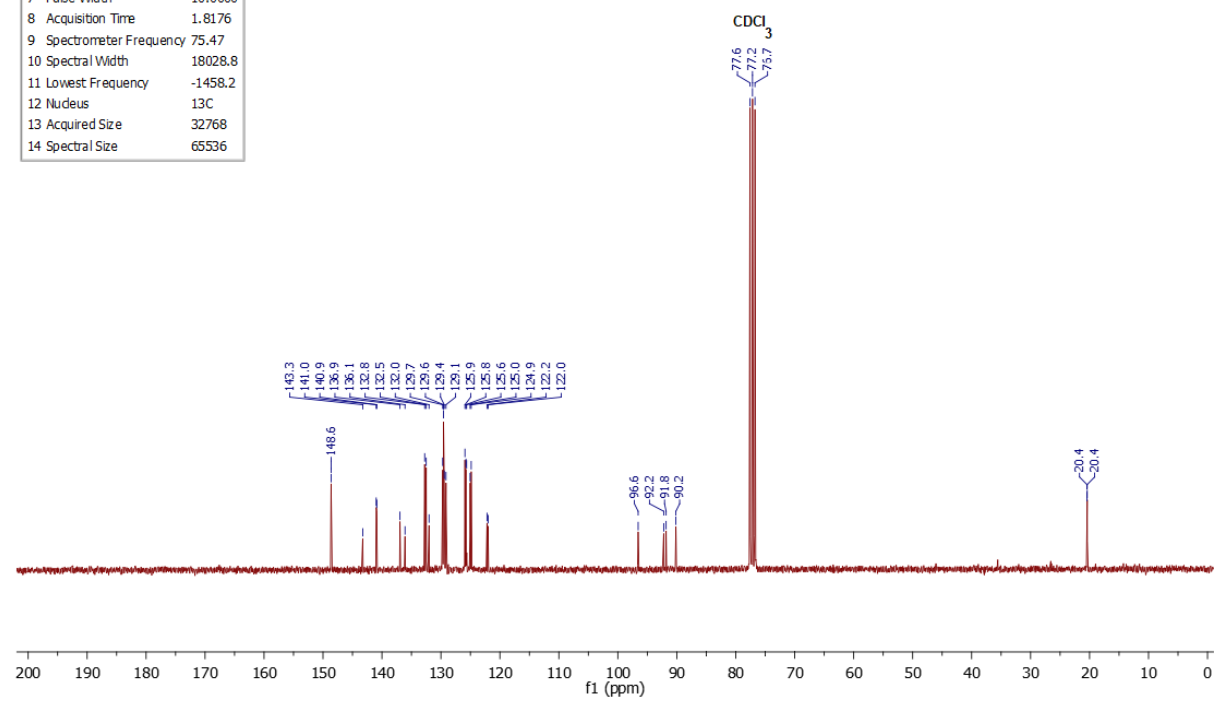

**2,4-bis((4-fluorophenyl)ethynyl)-3-(thiophen-3-yl)pyridine (1e)**

| Parameter                | Value   |
|--------------------------|---------|
| 1 Solvent                | CDCl3   |
| 2 Temperature            | 298.2   |
| 3 Pulse Sequence         | zg30    |
| 4 Number of Scans        | 16      |
| 5 Receiver Gain          | 812     |
| 6 Relaxation Delay       | 1.0000  |
| 7 Pulse Width            | 10.0000 |
| 8 Acquisition Time       | 6.3439  |
| 9 Spectrometer Frequency | 250.13  |
| 10 Spectral Width        | 5165.3  |
| 11 Lowest Frequency      | -1038.7 |
| 12 Nucleus               | 1H      |
| 13 Acquired Size         | 32768   |
| 14 Spectral Size         | 65536   |

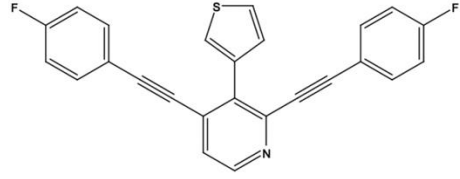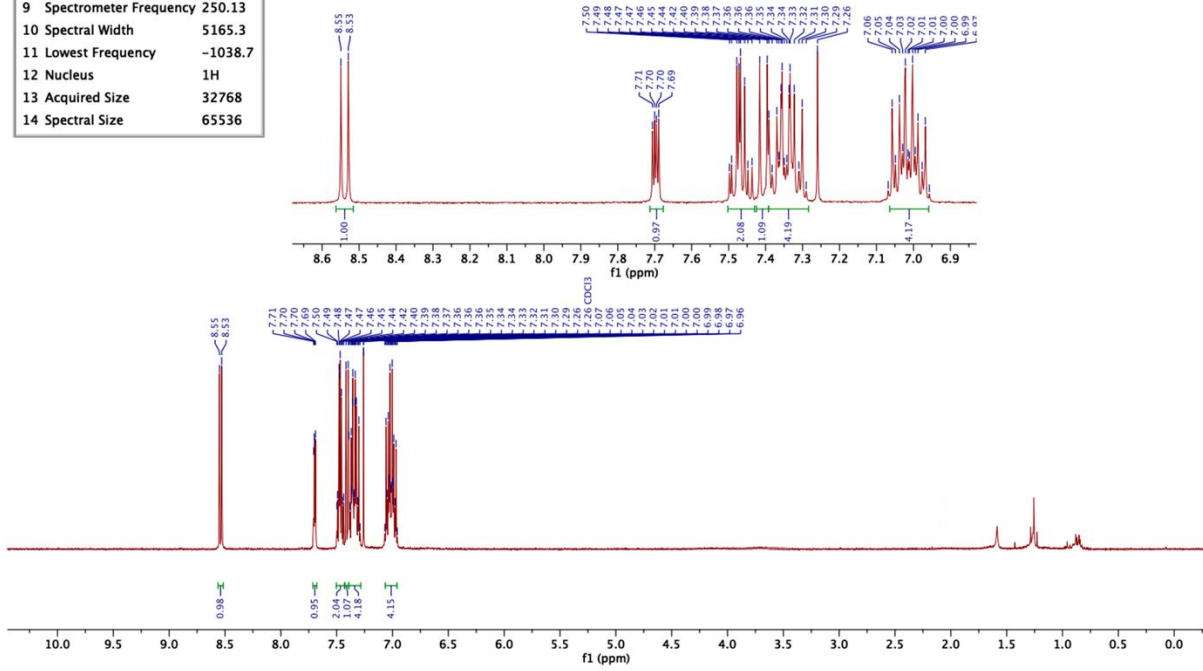

| Parameter                | Value    |
|--------------------------|----------|
| 1 Solvent                | CDCl3    |
| 2 Temperature            | 298.3    |
| 3 Pulse Sequence         | zgfhgqn  |
| 4 Number of Scans        | 64       |
| 5 Receiver Gain          | 2050     |
| 6 Relaxation Delay       | 1.0000   |
| 7 Pulse Width            | 10.0000  |
| 8 Acquisition Time       | 0.9787   |
| 9 Spectrometer Frequency | 282.40   |
| 10 Spectral Width        | 66964.3  |
| 11 Lowest Frequency      | -61722.4 |
| 12 Nucleus               | 19F      |
| 13 Acquired Size         | 65536    |
| 14 Spectral Size         | 131072   |

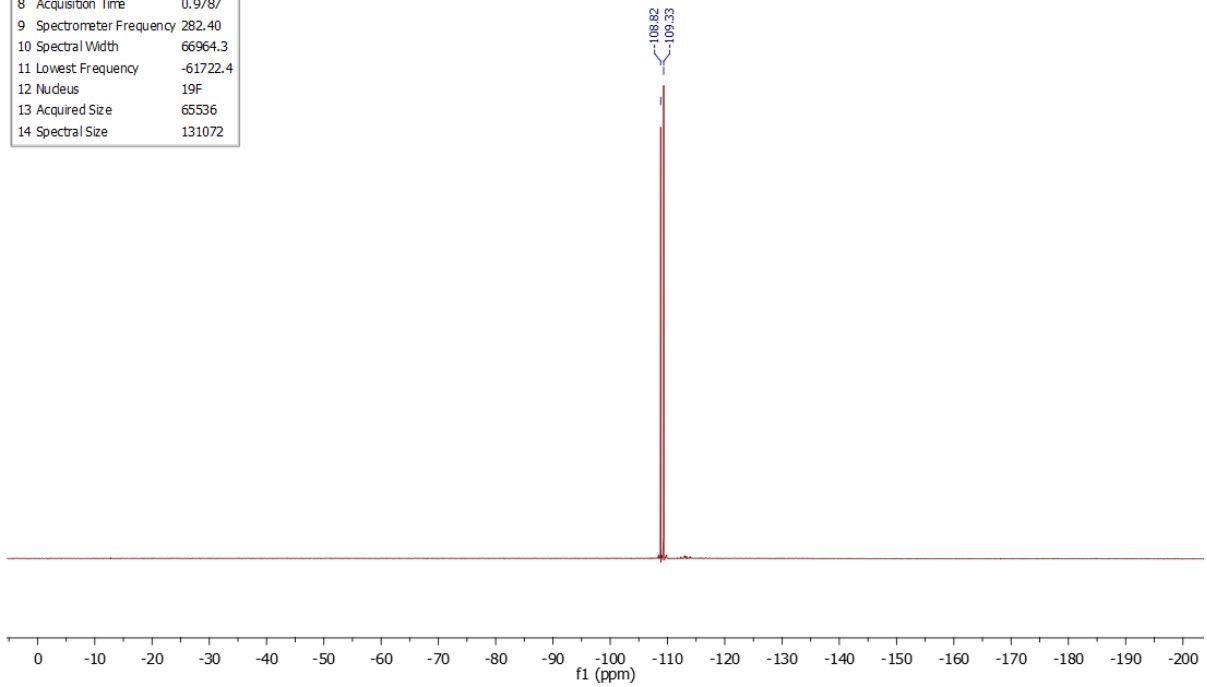

| Parameter                | Value   |
|--------------------------|---------|
| 1 Solvent                | CDCl3   |
| 2 Temperature            | 297.8   |
| 3 Pulse Sequence         | zgpg30  |
| 4 Number of Scans        | 1024    |
| 5 Receiver Gain          | 2050    |
| 6 Relaxation Delay       | 2.0000  |
| 7 Pulse Width            | 10.0000 |
| 8 Acquisition Time       | 2.1846  |
| 9 Spectrometer Frequency | 62.90   |
| 10 Spectral Width        | 15000.0 |
| 11 Lowest Frequency      | -1200.3 |
| 12 Nucleus               | 13C     |
| 13 Acquired Size         | 32768   |
| 14 Spectral Size         | 65536   |

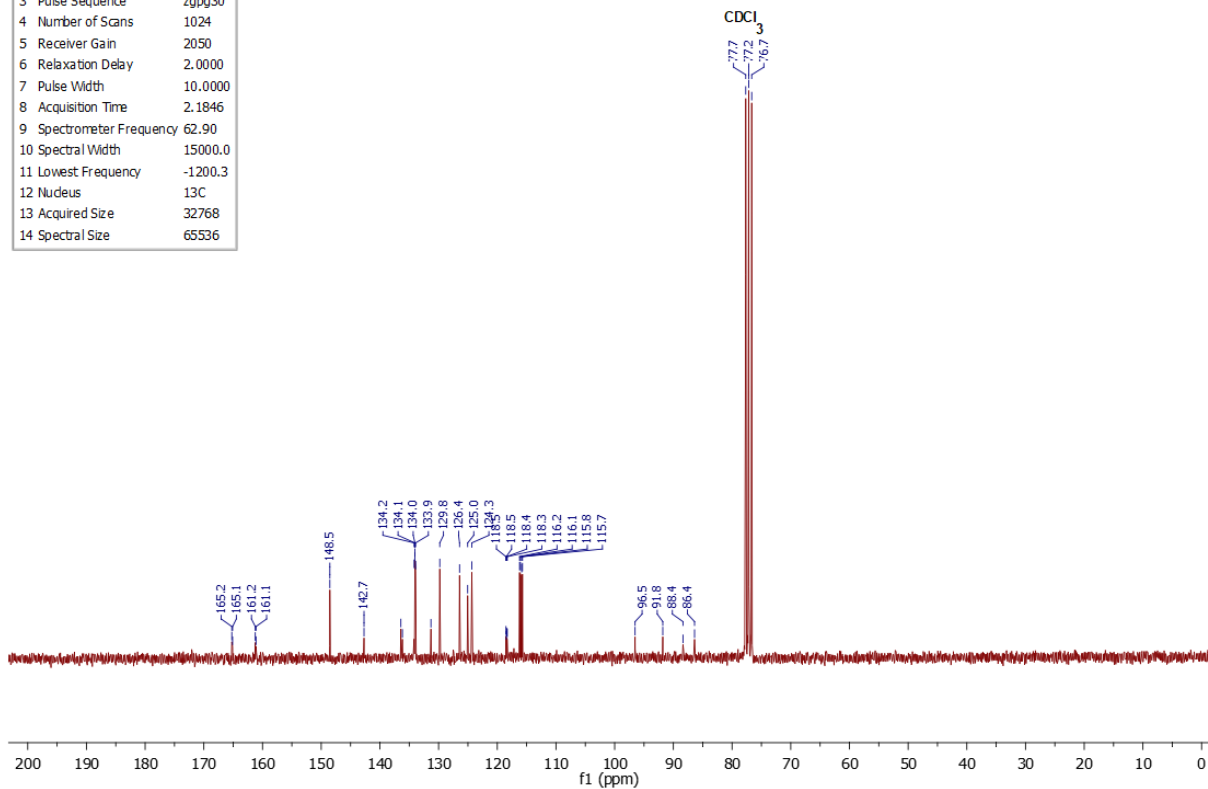

### 3-(thiophen-3-yl)-2,4-bis((4-(trifluoromethyl)phenyl)ethynyl)pyridine (1f)

| Parameter                | Value   |
|--------------------------|---------|
| 1 Solvent                | CDCl3   |
| 2 Temperature            | 298.3   |
| 3 Pulse Sequence         | zg30    |
| 4 Number of Scans        | 16      |
| 5 Receiver Gain          | 181     |
| 6 Relaxation Delay       | 1.0000  |
| 7 Pulse Width            | 10.0000 |
| 8 Acquisition Time       | 5.2954  |
| 9 Spectrometer Frequency | 300.13  |
| 10 Spectral Width        | 6188.1  |
| 11 Lowest Frequency      | -1246.5 |
| 12 Nucleus               | 1H      |
| 13 Acquired Size         | 32768   |
| 14 Spectral Size         | 65536   |

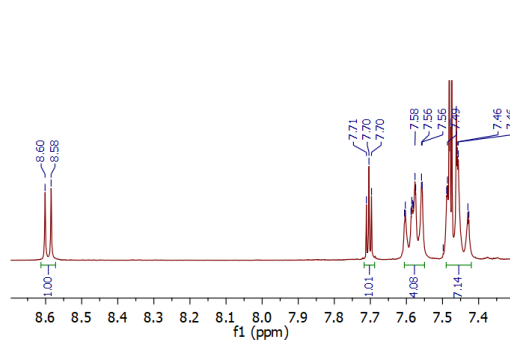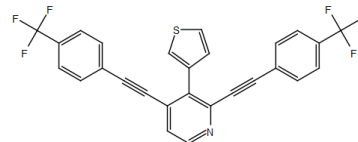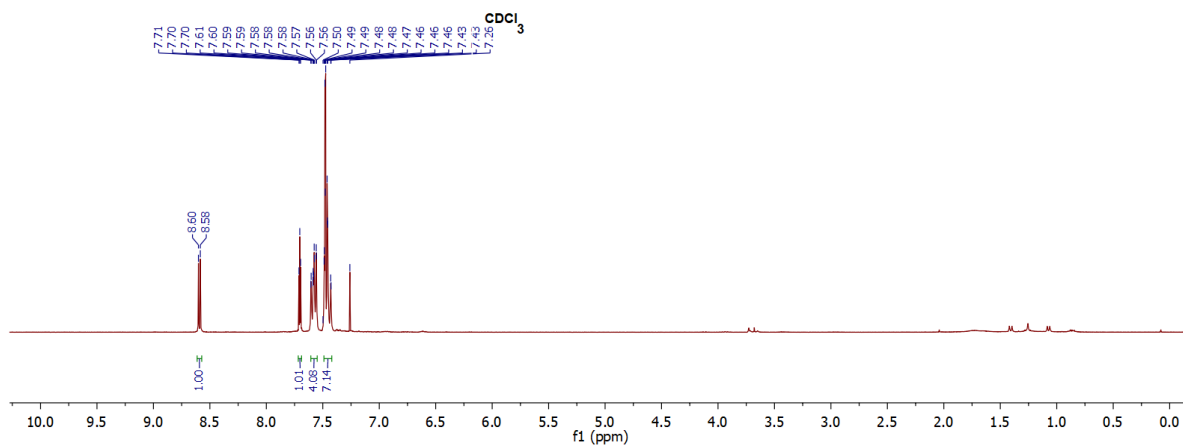



| Parameter                | Value             |
|--------------------------|-------------------|
| 1 Solvent                | CDCl <sub>3</sub> |
| 2 Temperature            | 298.7             |
| 3 Pulse Sequence         | zgfhgqn           |
| 4 Number of Scans        | 64                |
| 5 Receiver Gain          | 1620              |
| 6 Relaxation Delay       | 1.0000            |
| 7 Pulse Width            | 10.0000           |
| 8 Acquisition Time       | 0.9787            |
| 9 Spectrometer Frequency | 282.40            |
| 10 Spectral Width        | 66964.3           |
| 11 Lowest Frequency      | -61722.4          |
| 12 Nucleus               | 19F               |
| 13 Acquired Size         | 65536             |
| 14 Spectral Size         | 131072            |

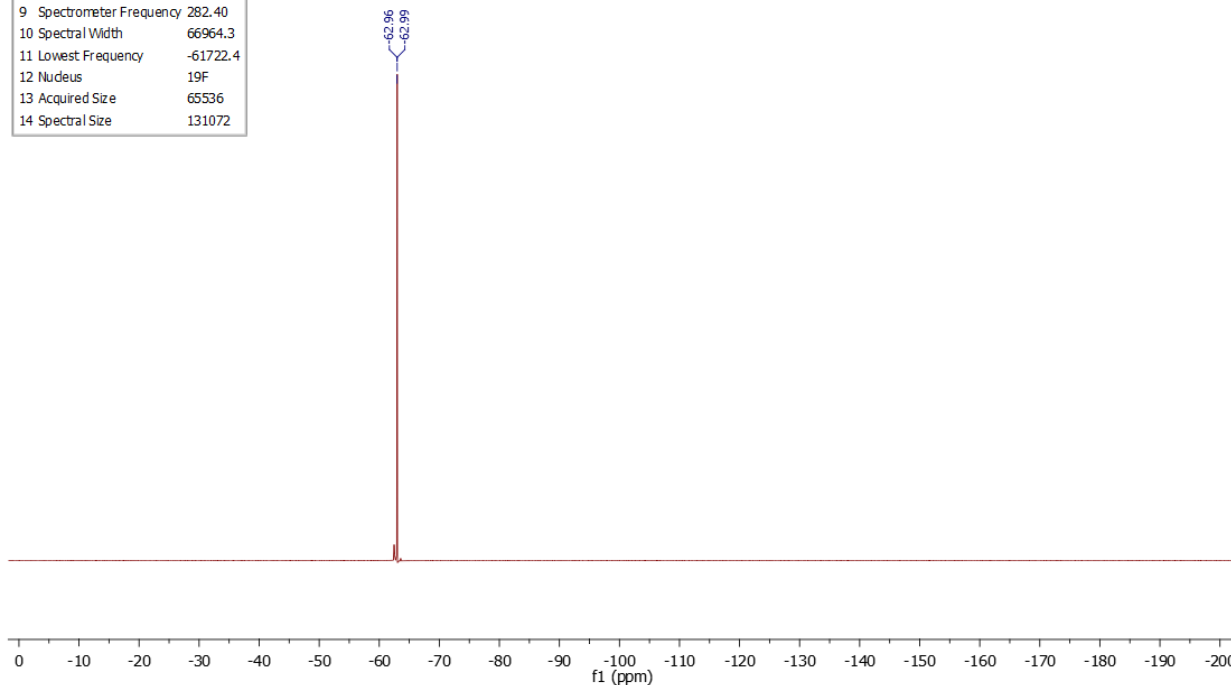

| Parameter                | Value             |
|--------------------------|-------------------|
| 1 Solvent                | CDCl <sub>3</sub> |
| 2 Temperature            | 298.7             |
| 3 Pulse Sequence         | zpgg30            |
| 4 Number of Scans        | 1024              |
| 5 Receiver Gain          | 2050              |
| 6 Relaxation Delay       | 2.0000            |
| 7 Pulse Width            | 10.0000           |
| 8 Acquisition Time       | 1.8176            |
| 9 Spectrometer Frequency | 75.47             |
| 10 Spectral Width        | 18028.8           |
| 11 Lowest Frequency      | -1457.6           |
| 12 Nucleus               | 13C               |
| 13 Acquired Size         | 32768             |
| 14 Spectral Size         | 65536             |

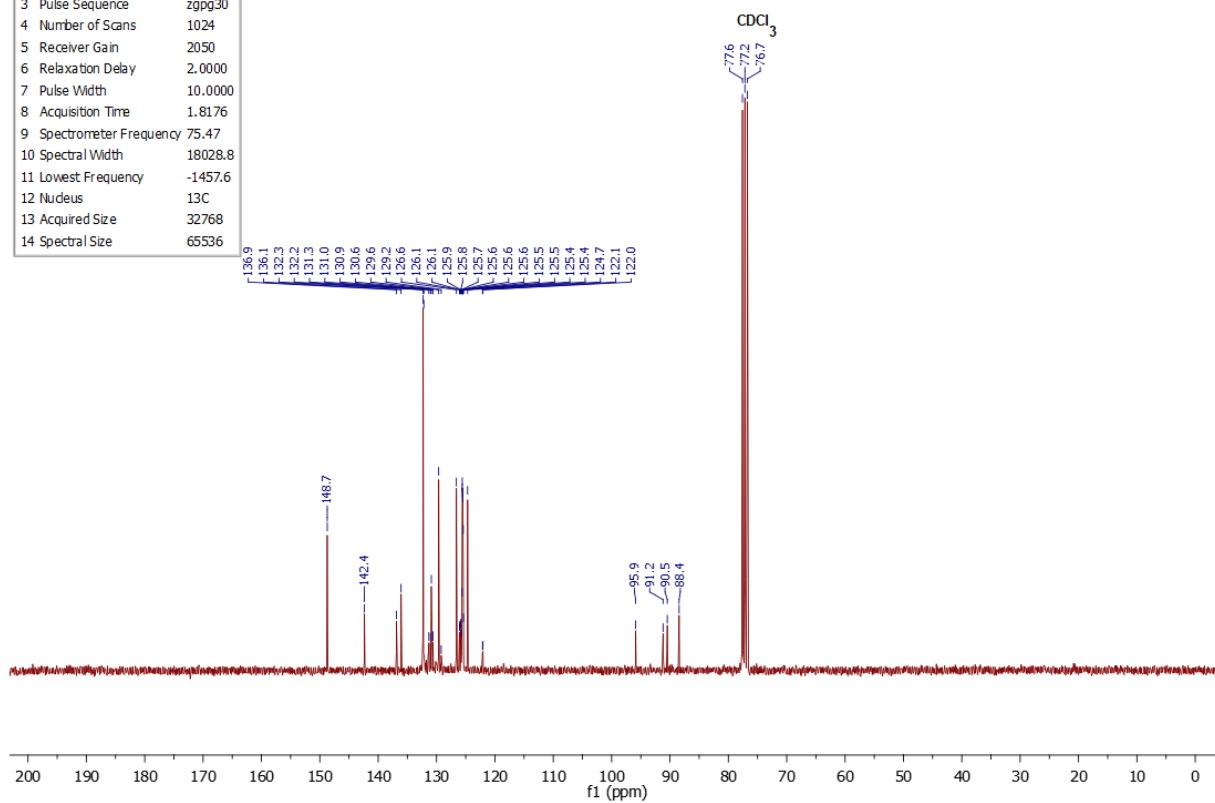

### 4,4'-((3-(thiophen-3-yl)pyridine-2,4-diyl)bis(ethyne-2,1-diyl))dibenzonitrile (1g)

| Parameter                | Value             |
|--------------------------|-------------------|
| 1 Solvent                | CDCl <sub>3</sub> |
| 2 Temperature            | 298.2             |
| 3 Pulse Sequence         | zg30              |
| 4 Number of Scans        | 16                |
| 5 Receiver Gain          | 512               |
| 6 Relaxation Delay       | 2.0000            |
| 7 Pulse Width            | 10.0000           |
| 8 Acquisition Time       | 5.2954            |
| 9 Spectrometer Frequency | 300.13            |
| 10 Spectral Width        | 6188.1            |
| 11 Lowest Frequency      | -1246.5           |
| 12 Nucleus               | <sup>1</sup> H    |
| 13 Acquired Size         | 32768             |
| 14 Spectral Size         | 65536             |

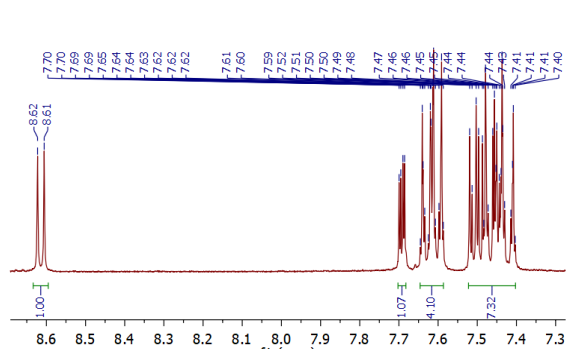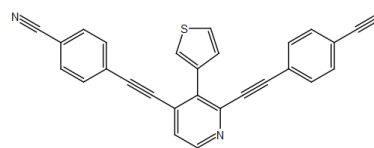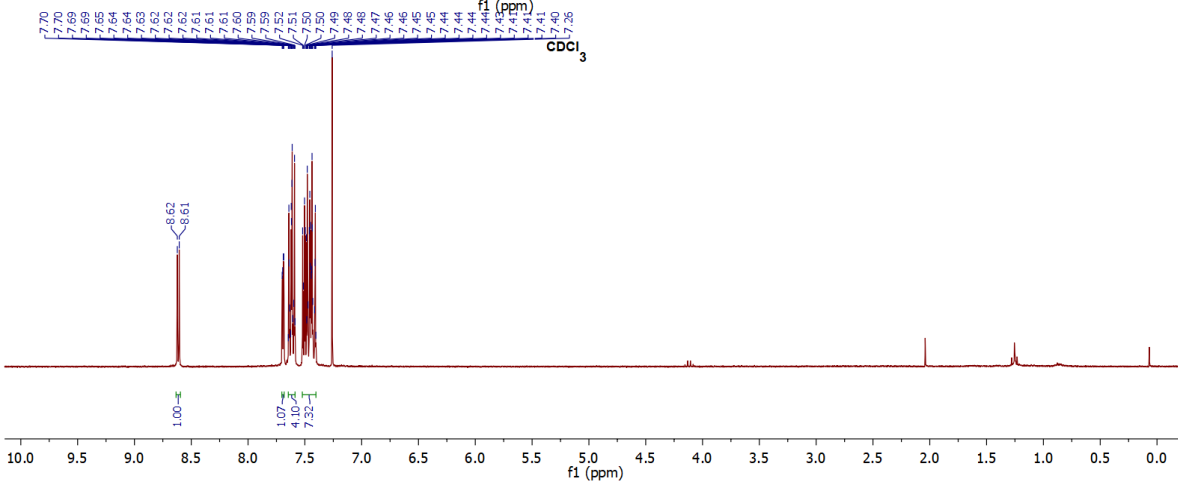

| Parameter                | Value             |
|--------------------------|-------------------|
| 1 Solvent                | CDCl <sub>3</sub> |
| 2 Temperature            | 298.2             |
| 3 Pulse Sequence         | zgpg30            |
| 4 Number of Scans        | 1024              |
| 5 Receiver Gain          | 2050              |
| 6 Relaxation Delay       | 2.0000            |
| 7 Pulse Width            | 10.0000           |
| 8 Acquisition Time       | 1.8176            |
| 9 Spectrometer Frequency | 75.47             |
| 10 Spectral Width        | 18028.8           |
| 11 Lowest Frequency      | -1457.4           |
| 12 Nucleus               | <sup>13</sup> C   |
| 13 Acquired Size         | 32768             |
| 14 Spectral Size         | 65536             |

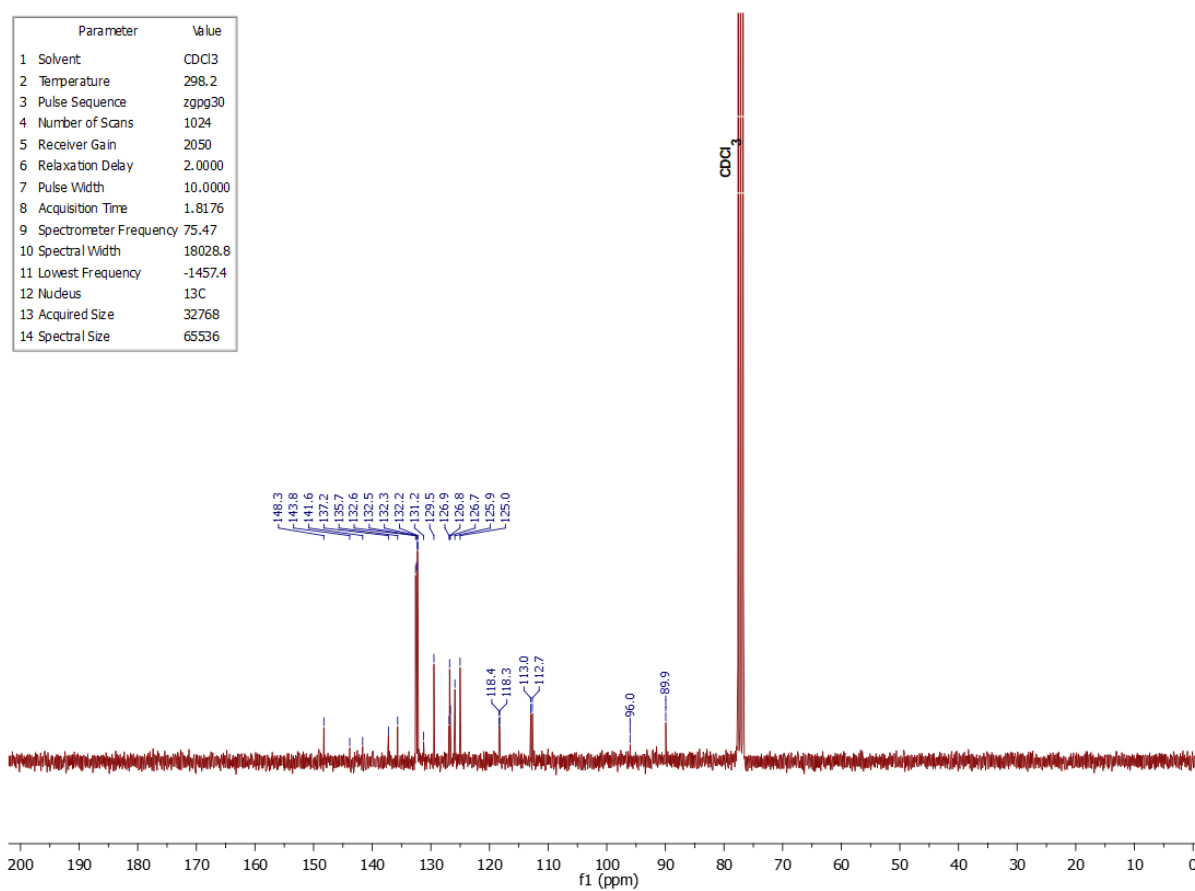

### 3-(thiophen-3-yl)-2,4-bis(thiophen-3-ylethynyl)pyridine (1h)

| Parameter                | Value   |
|--------------------------|---------|
| 1 Solvent                | CDCl3   |
| 2 Temperature            | 298.2   |
| 3 Pulse Sequence         | zg30    |
| 4 Number of Scans        | 16      |
| 5 Receiver Gain          | 645     |
| 6 Relaxation Delay       | 1.0000  |
| 7 Pulse Width            | 10.0000 |
| 8 Acquisition Time       | 6.3439  |
| 9 Spectrometer Frequency | 250.13  |
| 10 Spectral Width        | 5165.3  |
| 11 Lowest Frequency      | -1034.2 |
| 12 Nucleus               | 1H      |
| 13 Acquired Size         | 32768   |
| 14 Spectral Size         | 65536   |

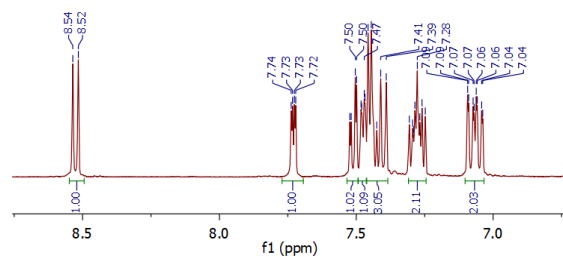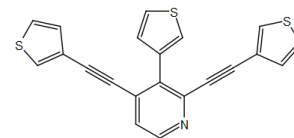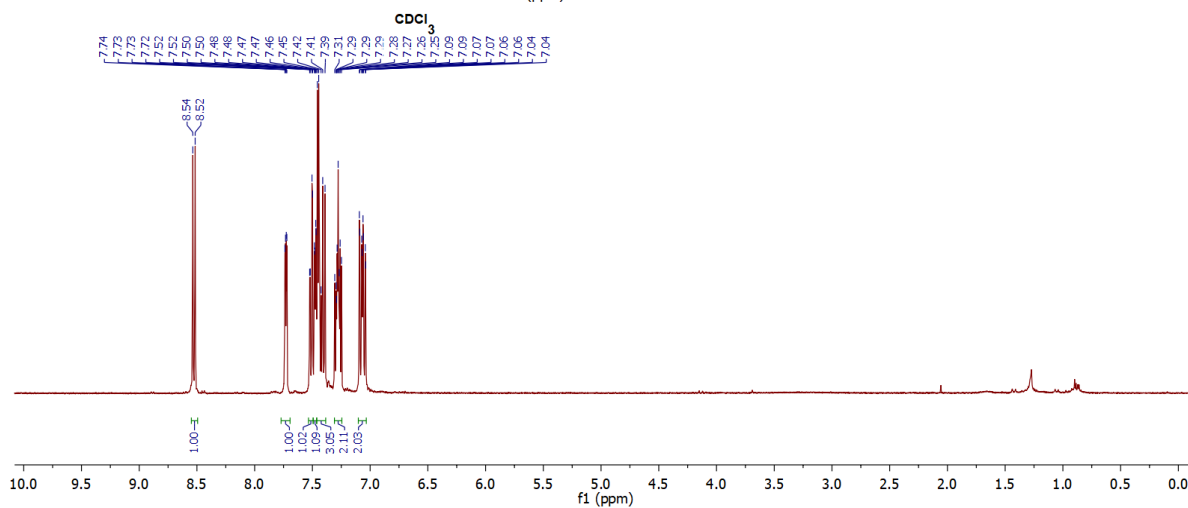

| Parameter                | Value   |
|--------------------------|---------|
| 1 Solvent                | CDCl3   |
| 2 Temperature            | 298.0   |
| 3 Pulse Sequence         | zgpg30  |
| 4 Number of Scans        | 1024    |
| 5 Receiver Gain          | 1030    |
| 6 Relaxation Delay       | 2.0000  |
| 7 Pulse Width            | 10.0000 |
| 8 Acquisition Time       | 2.1846  |
| 9 Spectrometer Frequency | 62.90   |
| 10 Spectral Width        | 15000.0 |
| 11 Lowest Frequency      | -1203.5 |
| 12 Nucleus               | 13C     |
| 13 Acquired Size         | 32768   |
| 14 Spectral Size         | 65536   |

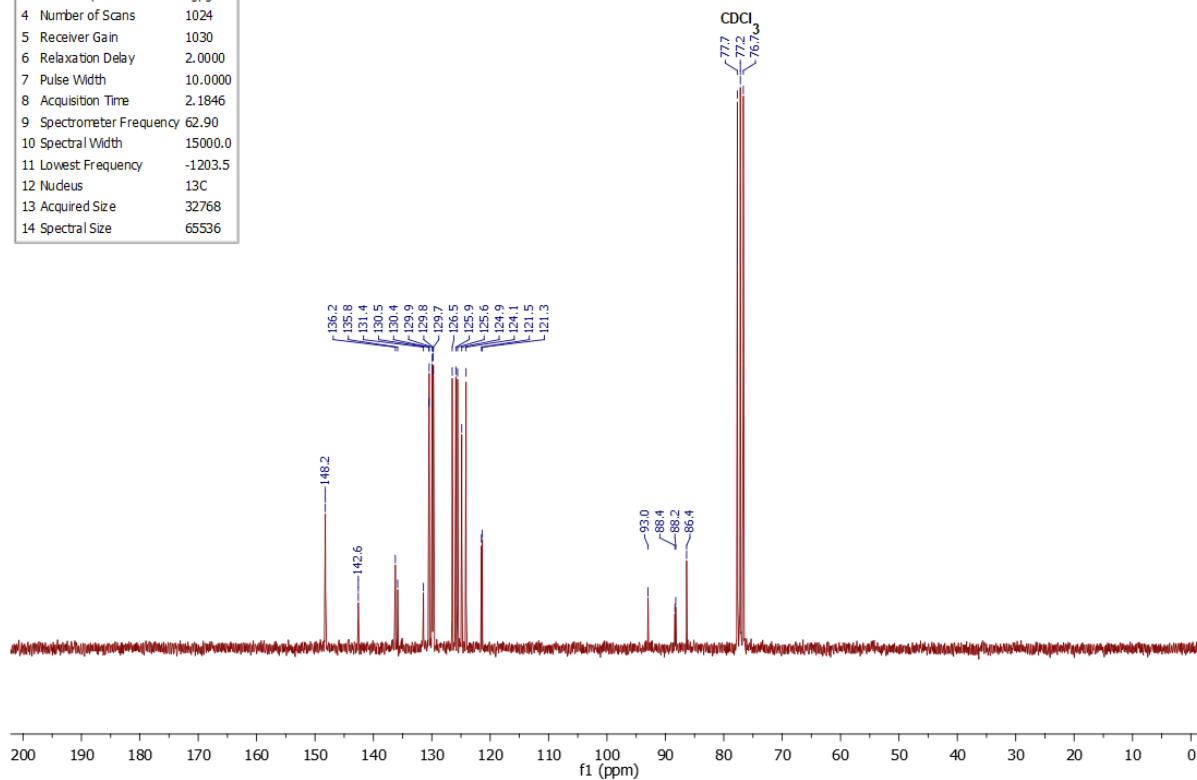

2,4-bis((4-methoxyphenyl)ethynyl)-3-(thiophen-3-yl)pyridine (1i)

| Parameter                | Value   |
|--------------------------|---------|
| 1 Solvent                | CDCl3   |
| 2 Temperature            | 298.1   |
| 3 Pulse Sequence         | zg30    |
| 4 Number of Scans        | 16      |
| 5 Receiver Gain          | 645     |
| 6 Relaxation Delay       | 1.0000  |
| 7 Pulse Width            | 10.0000 |
| 8 Acquisition Time       | 6.3439  |
| 9 Spectrometer Frequency | 250.13  |
| 10 Spectral Width        | 5165.3  |
| 11 Lowest Frequency      | -1038.7 |
| 12 Nucleus               | 1H      |
| 13 Acquired Size         | 32768   |
| 14 Spectral Size         | 65536   |

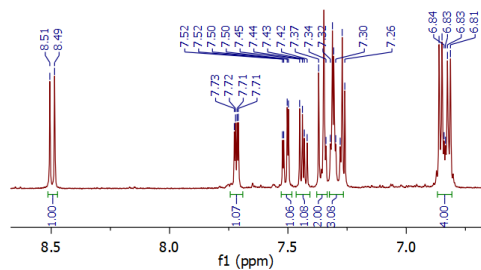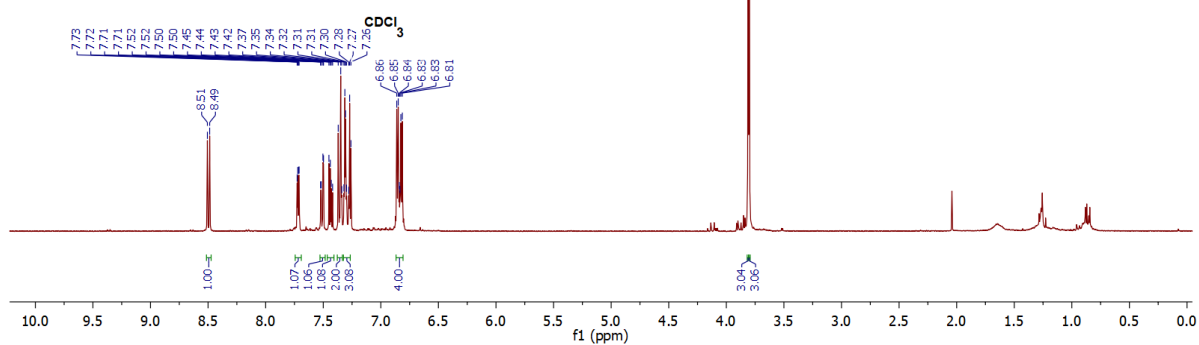

| Parameter                | Value   |
|--------------------------|---------|
| 1 Solvent                | CDCl3   |
| 2 Temperature            | 298.0   |
| 3 Pulse Sequence         | zpgp30  |
| 4 Number of Scans        | 1024    |
| 5 Receiver Gain          | 2050    |
| 6 Relaxation Delay       | 2.0000  |
| 7 Pulse Width            | 10.0000 |
| 8 Acquisition Time       | 2.1846  |
| 9 Spectrometer Frequency | 62.90   |
| 10 Spectral Width        | 15000.0 |
| 11 Lowest Frequency      | -1201.3 |
| 12 Nucleus               | 13C     |
| 13 Acquired Size         | 32768   |
| 14 Spectral Size         | 65536   |

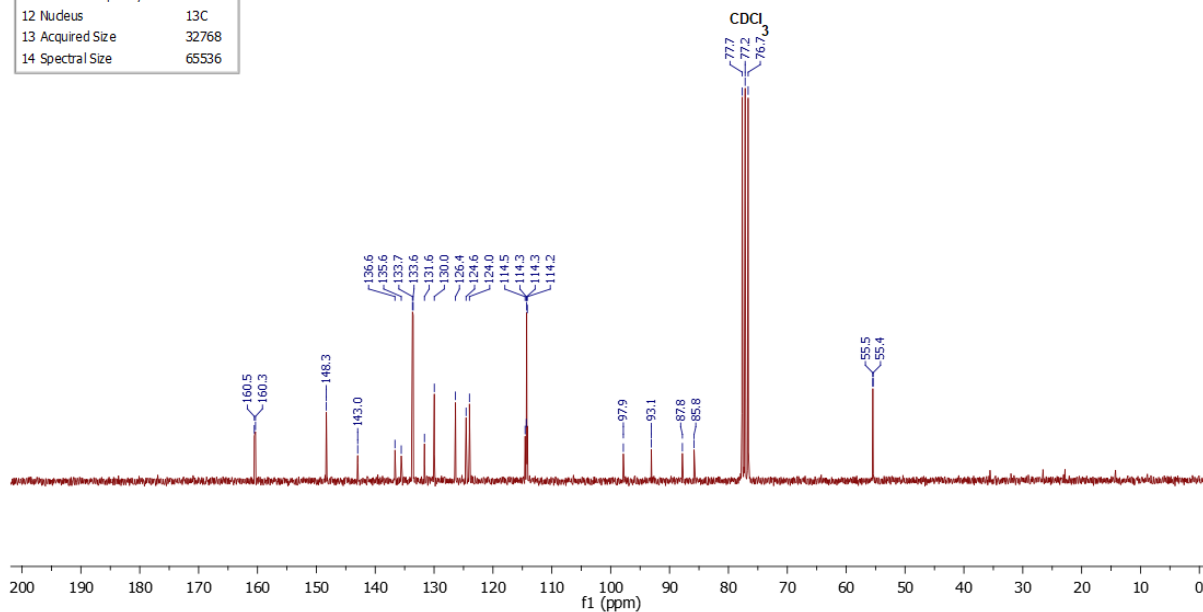

2,4-bis((4-methoxyphenyl)ethynyl)-3-(thiophen-3-yl)pyridine (1j)

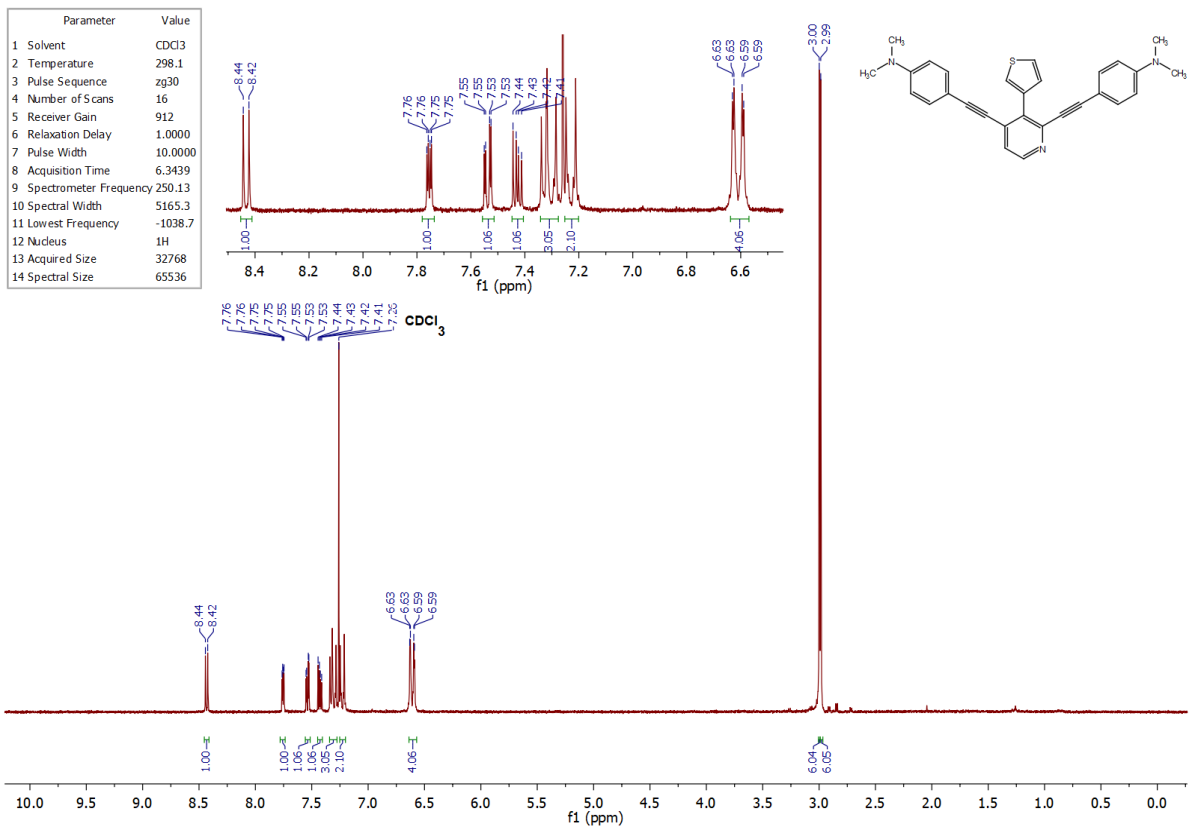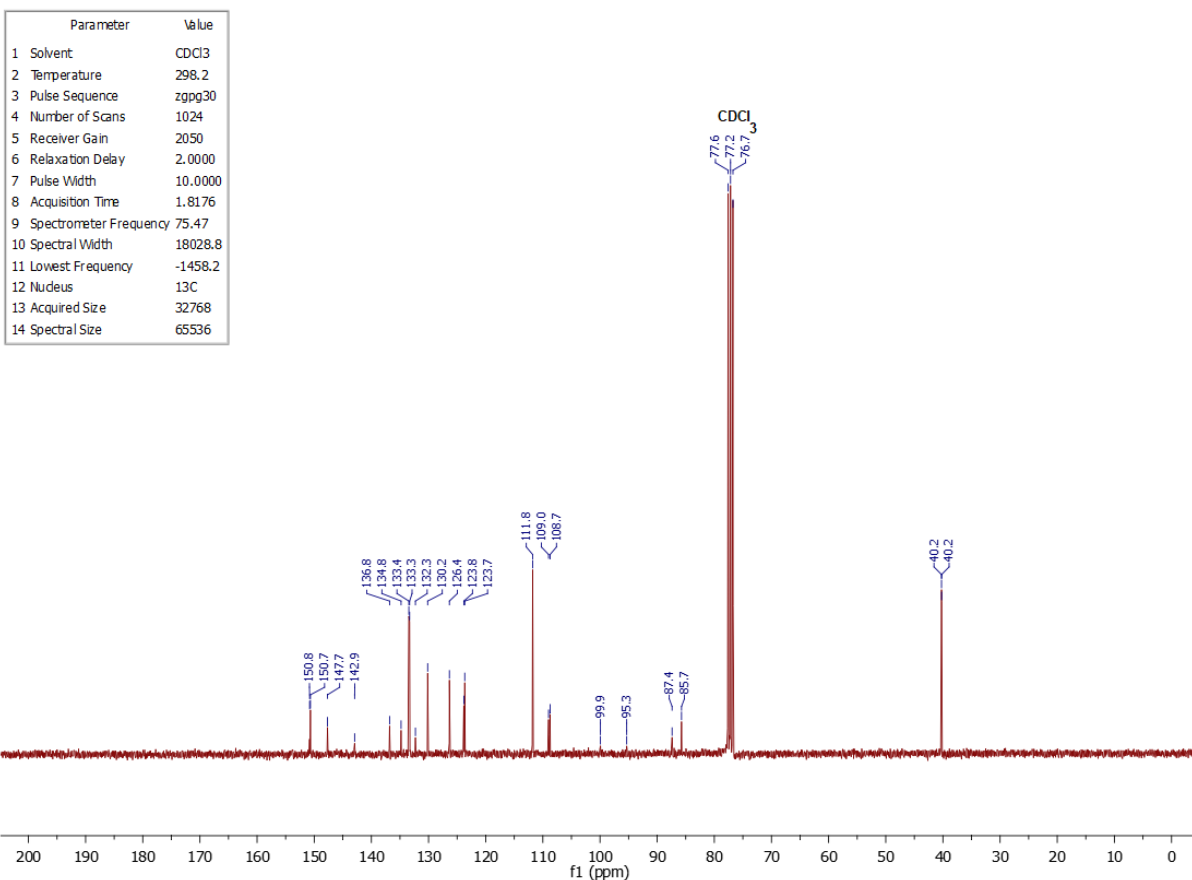

2,4-bis(phenylethynyl)-3-(thiophen-3-yl)quinoline (2a)

| Parameter                | Value   |
|--------------------------|---------|
| 1 Solvent                | CDCl3   |
| 2 Temperature            | 298.2   |
| 3 Pulse Sequence         | zg30    |
| 4 Number of Scans        | 16      |
| 5 Receiver Gain          | 101     |
| 6 Relaxation Delay       | 1.0000  |
| 7 Pulse Width            | 8.0000  |
| 8 Acquisition Time       | 3.2768  |
| 9 Spectrometer Frequency | 500.13  |
| 10 Spectral Width        | 10000.0 |
| 11 Lowest Frequency      | -1924.0 |
| 12 Nucleus               | 1H      |
| 13 Acquired Size         | 32768   |
| 14 Spectral Size         | 65536   |

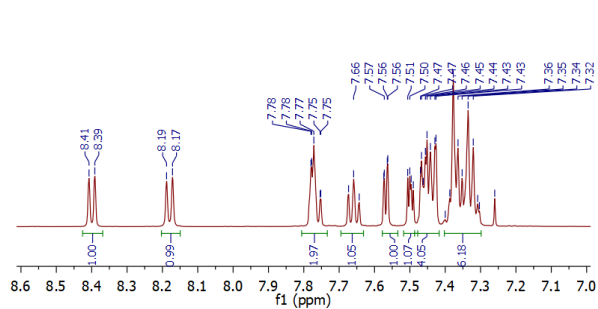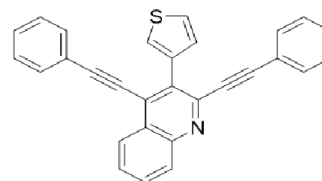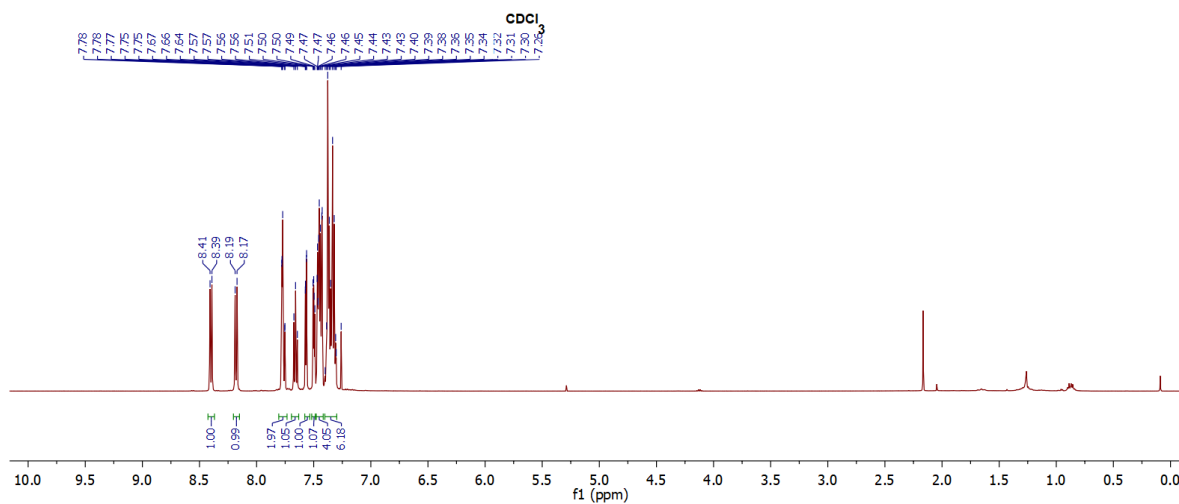

| Parameter                | Value   |
|--------------------------|---------|
| 1 Solvent                | CDCl3   |
| 2 Temperature            | 298.2   |
| 3 Pulse Sequence         | zgpg30  |
| 4 Number of Scans        | 1024    |
| 5 Receiver Gain          | 101     |
| 6 Relaxation Delay       | 2.0000  |
| 7 Pulse Width            | 10.0000 |
| 8 Acquisition Time       | 1.0879  |
| 9 Spectrometer Frequency | 125.77  |
| 10 Spectral Width        | 30120.5 |
| 11 Lowest Frequency      | -2471.5 |
| 12 Nucleus               | 13C     |
| 13 Acquired Size         | 32768   |
| 14 Spectral Size         | 65536   |

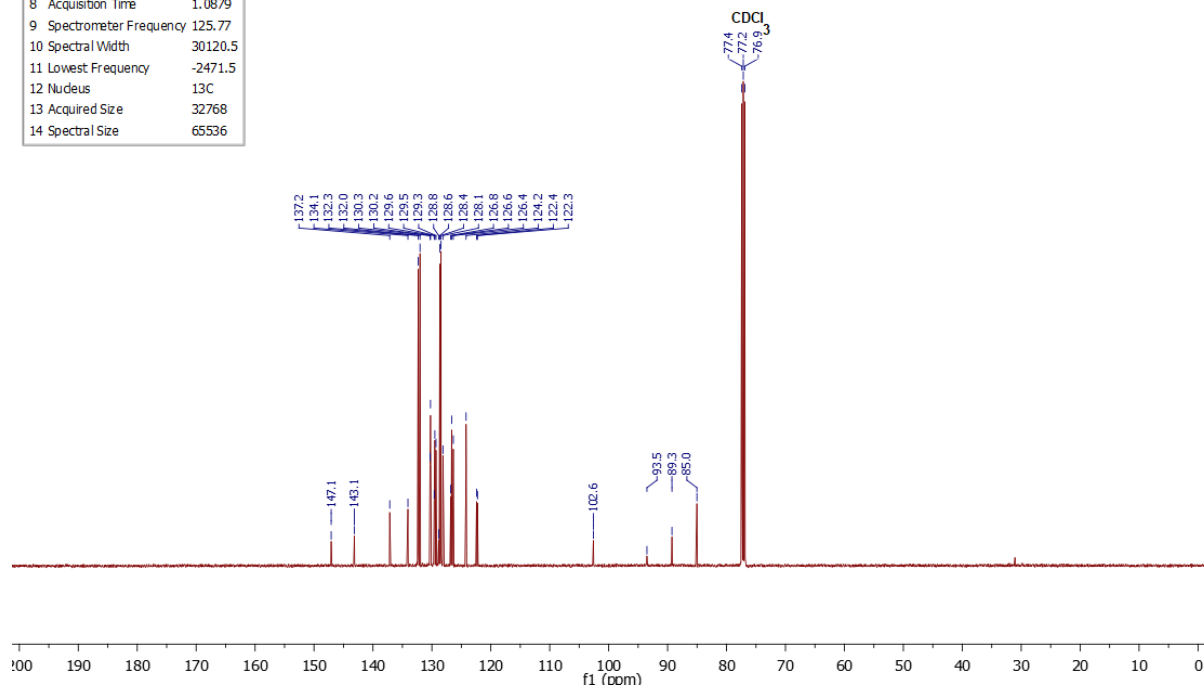

**2,4-bis((4-fluorophenyl)ethynyl)-3-(thiophen-3-yl)quinoline (2b)**



| Parameter                | Value   |
|--------------------------|---------|
| 1 Solvent                | CDCl3   |
| 2 Temperature            | 298.2   |
| 3 Pulse Sequence         | zgpg30  |
| 4 Number of Scans        | 2000    |
| 5 Receiver Gain          | 2050    |
| 6 Relaxation Delay       | 2.0000  |
| 7 Pulse Width            | 10.0000 |
| 8 Acquisition Time       | 2.1846  |
| 9 Spectrometer Frequency | 62.90   |
| 10 Spectral Width        | 15000.0 |
| 11 Lowest Frequency      | -1202.5 |
| 12 Nucleus               | 13C     |
| 13 Acquired Size         | 32768   |
| 14 Spectral Size         | 65536   |

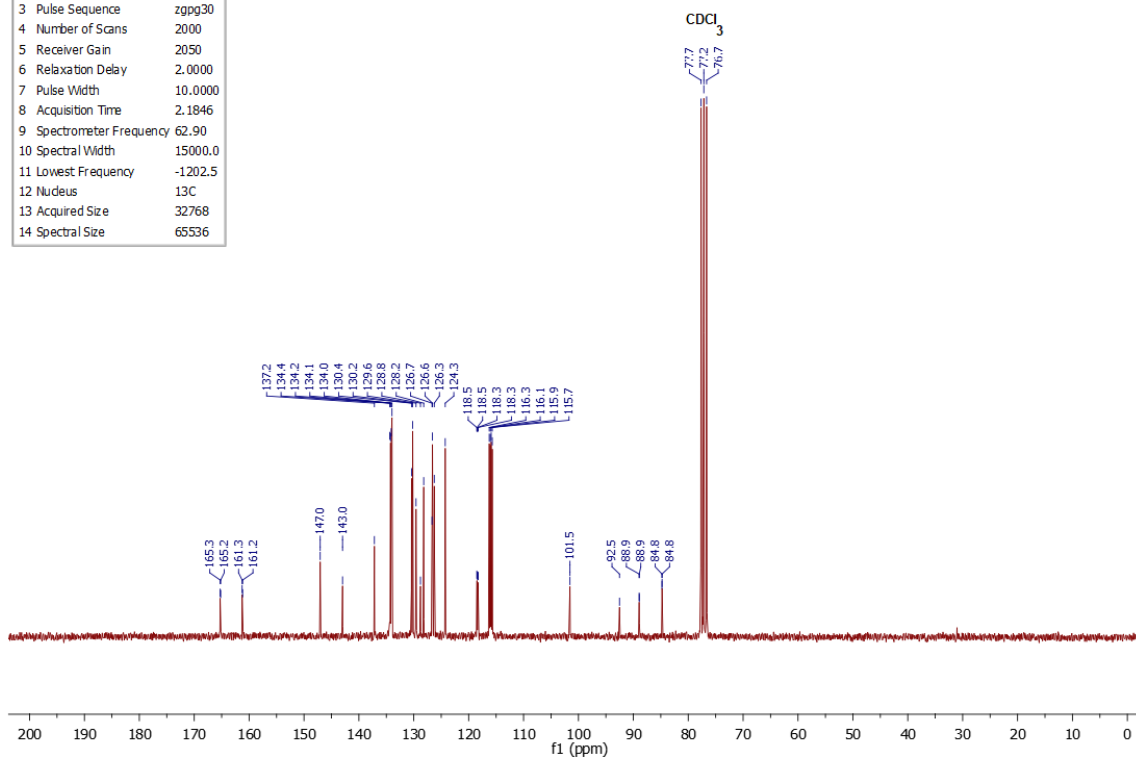

#### 4,4'-((3-(thiophen-3-yl)quinoline-2,4-diyl)bis(ethyne-2,1-diyl))bis(N,N-dimethylaniline) (2c)

| Parameter                | Value   |
|--------------------------|---------|
| 1 Solvent                | CDCl3   |
| 2 Temperature            | 298.2   |
| 3 Pulse Sequence         | zg30    |
| 4 Number of Scans        | 16      |
| 5 Receiver Gain          | 101     |
| 6 Relaxation Delay       | 1.0000  |
| 7 Pulse Width            | 8.0000  |
| 8 Acquisition Time       | 3.2768  |
| 9 Spectrometer Frequency | 500.13  |
| 10 Spectral Width        | 10000.0 |
| 11 Lowest Frequency      | -1923.9 |
| 12 Nucleus               | 1H      |
| 13 Acquired Size         | 32768   |
| 14 Spectral Size         | 65536   |

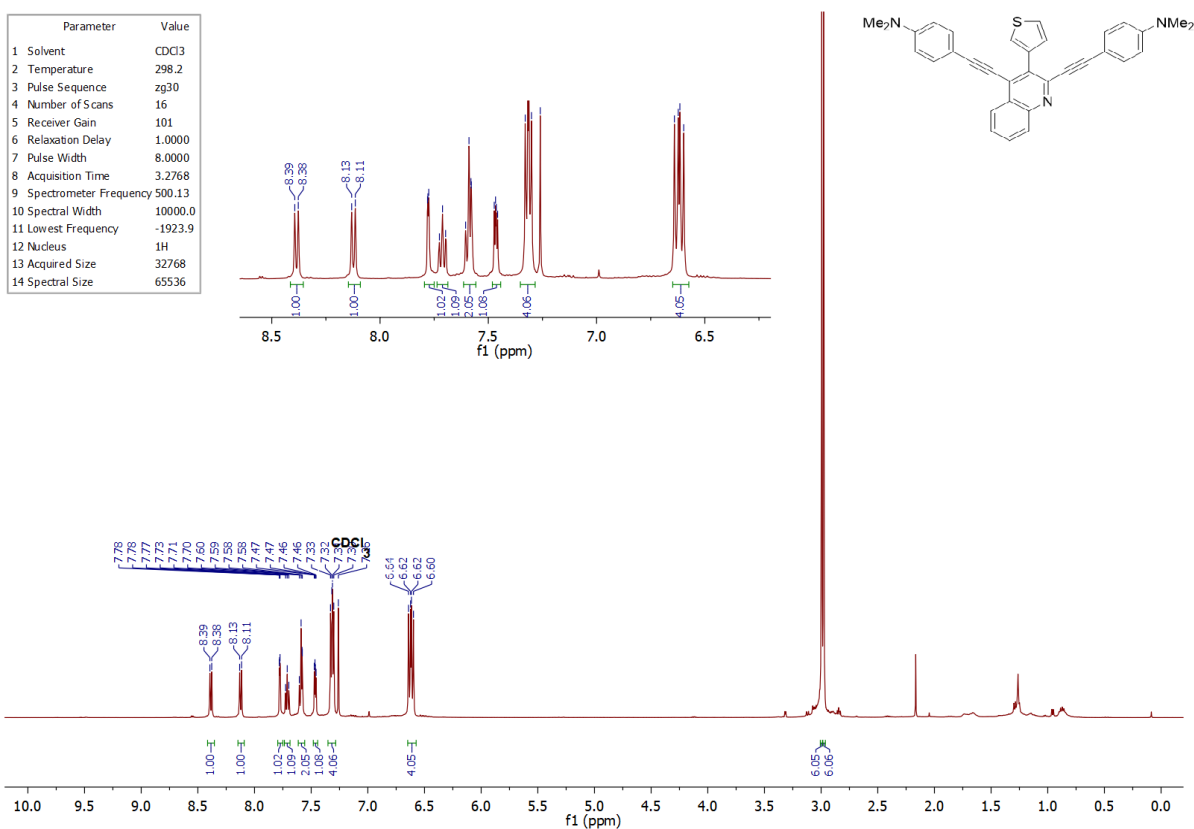



| Parameter                | Value             |
|--------------------------|-------------------|
| 1 Solvent                | CDCl <sub>3</sub> |
| 2 Temperature            | 298.2             |
| 3 Pulse Sequence         | zgpg30            |
| 4 Number of Scans        | 1024              |
| 5 Receiver Gain          | 101               |
| 6 Relaxation Delay       | 2.0000            |
| 7 Pulse Width            | 10.0000           |
| 8 Acquisition Time       | 1.0879            |
| 9 Spectrometer Frequency | 125.76            |
| 10 Spectral Width        | 30120.5           |
| 11 Lowest Frequency      | -2473.0           |
| 12 Nucleus               | 13C               |
| 13 Acquired Size         | 32768             |
| 14 Spectral Size         | 32768             |

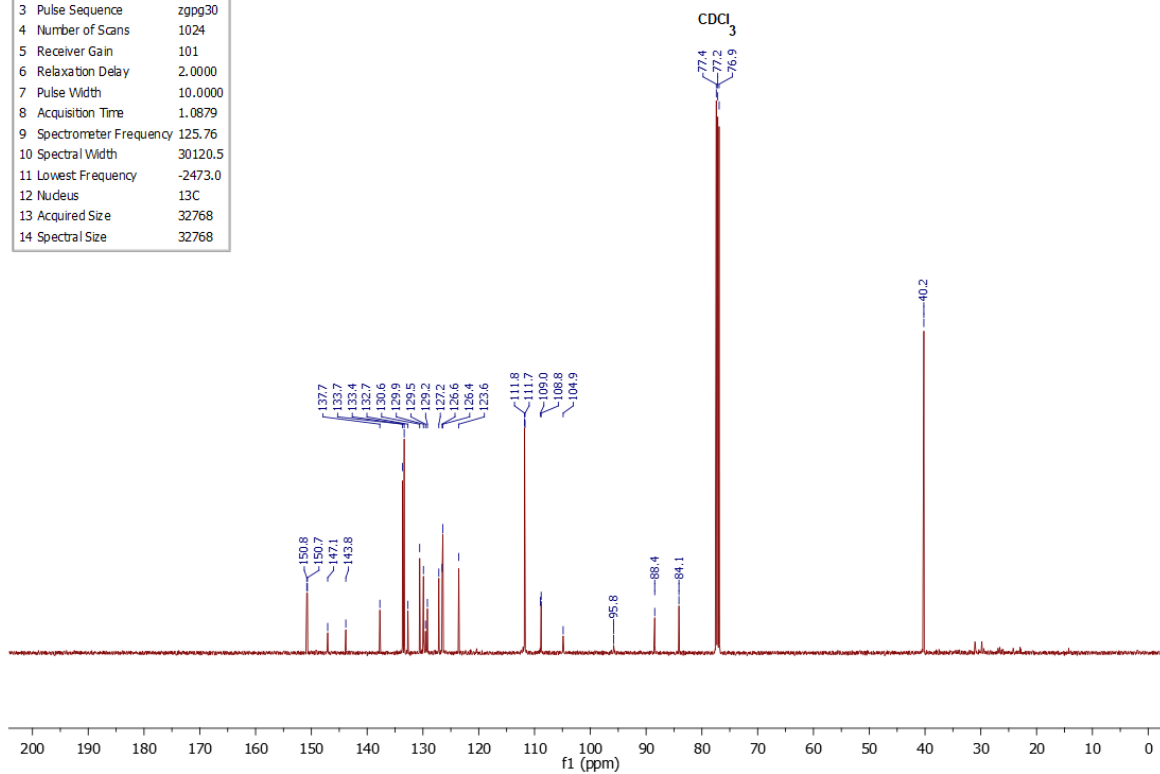

#### 4-phenyl-9-(phenylethynyl)thieno[3,2-f]quinoline (3a)

| Parameter                | Value             |
|--------------------------|-------------------|
| 1 Solvent                | CDCl <sub>3</sub> |
| 2 Temperature            | 298.1             |
| 3 Pulse Sequence         | zg30              |
| 4 Number of Scans        | 16                |
| 5 Receiver Gain          | 362               |
| 6 Relaxation Delay       | 1.0000            |
| 7 Pulse Width            | 10.0000           |
| 8 Acquisition Time       | 6.3439            |
| 9 Spectrometer Frequency | 250.13            |
| 10 Spectral Width        | 5165.3            |
| 11 Lowest Frequency      | -1038.6           |
| 12 Nucleus               | 1H                |
| 13 Acquired Size         | 32768             |
| 14 Spectral Size         | 65536             |

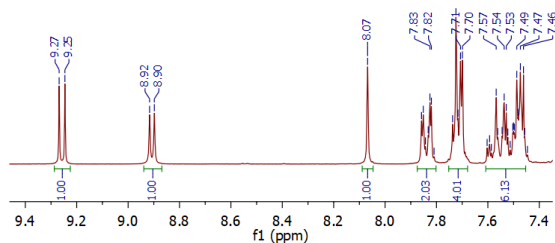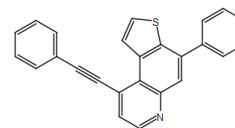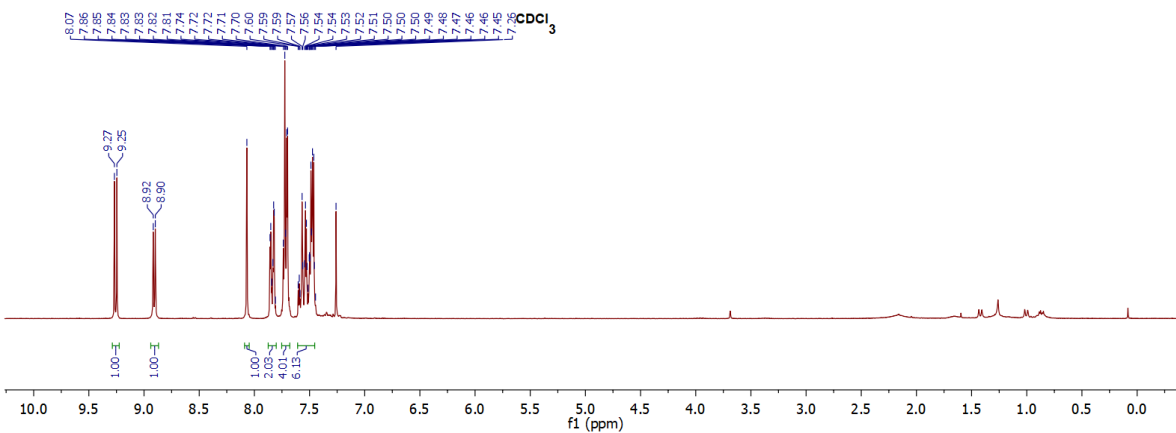

| Parameter                | Value             |
|--------------------------|-------------------|
| 1 Solvent                | CDCl <sub>3</sub> |
| 2 Temperature            | 297.8             |
| 3 Pulse Sequence         | zgpg30            |
| 4 Number of Scans        | 1024              |
| 5 Receiver Gain          | 2050              |
| 6 Relaxation Delay       | 2.0000            |
| 7 Pulse Width            | 10.0000           |
| 8 Acquisition Time       | 2.1846            |
| 9 Spectrometer Frequency | 62.90             |
| 10 Spectral Width        | 15000.0           |
| 11 Lowest Frequency      | -1200.8           |
| 12 Nucleus               | 13C               |
| 13 Acquired Size         | 32768             |
| 14 Spectral Size         | 65536             |

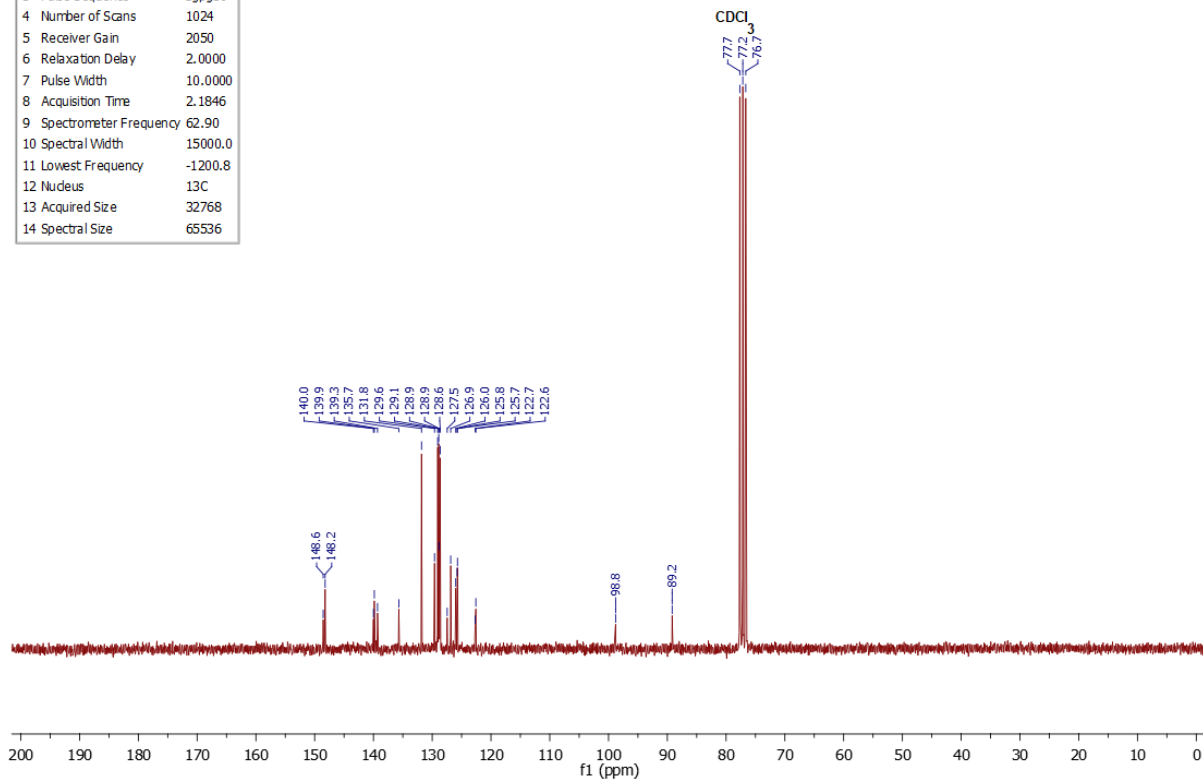

#### 4-(*p*-tolyl)-9-(*p*-tolylethynyl)thieno[3,2-*f*]quinoline (3b)

| Parameter                | Value             |
|--------------------------|-------------------|
| 1 Solvent                | CDCl <sub>3</sub> |
| 2 Temperature            | 298.1             |
| 3 Pulse Sequence         | zg30              |
| 4 Number of Scans        | 16                |
| 5 Receiver Gain          | 575               |
| 6 Relaxation Delay       | 1.0000            |
| 7 Pulse Width            | 10.0000           |
| 8 Acquisition Time       | 6.3439            |
| 9 Spectrometer Frequency | 250.13            |
| 10 Spectral Width        | 5165.3            |
| 11 Lowest Frequency      | -1003.4           |
| 12 Nucleus               | 1H                |
| 13 Acquired Size         | 32768             |
| 14 Spectral Size         | 65536             |

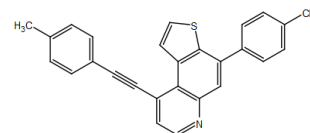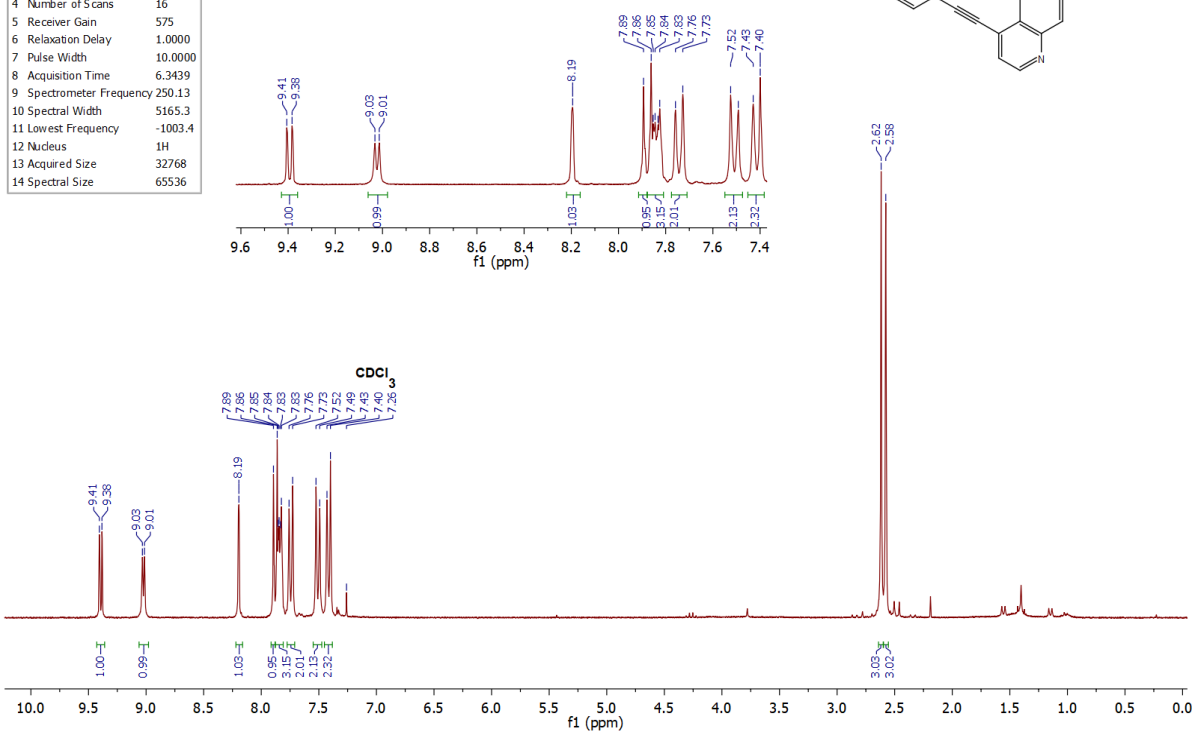

| Parameter                | Value             |
|--------------------------|-------------------|
| 1 Solvent                | CDCl <sub>3</sub> |
| 2 Temperature            | 298.0             |
| 3 Pulse Sequence         | zgpg30            |
| 4 Number of Scans        | 1024              |
| 5 Receiver Gain          | 1150              |
| 6 Relaxation Delay       | 2.0000            |
| 7 Pulse Width            | 10.0000           |
| 8 Acquisition Time       | 2.1846            |
| 9 Spectrometer Frequency | 62.90             |
| 10 Spectral Width        | 15000.0           |
| 11 Lowest Frequency      | -1202.0           |
| 12 Nucleus               | <sup>13</sup> C   |
| 13 Acquired Size         | 32768             |
| 14 Spectral Size         | 65536             |

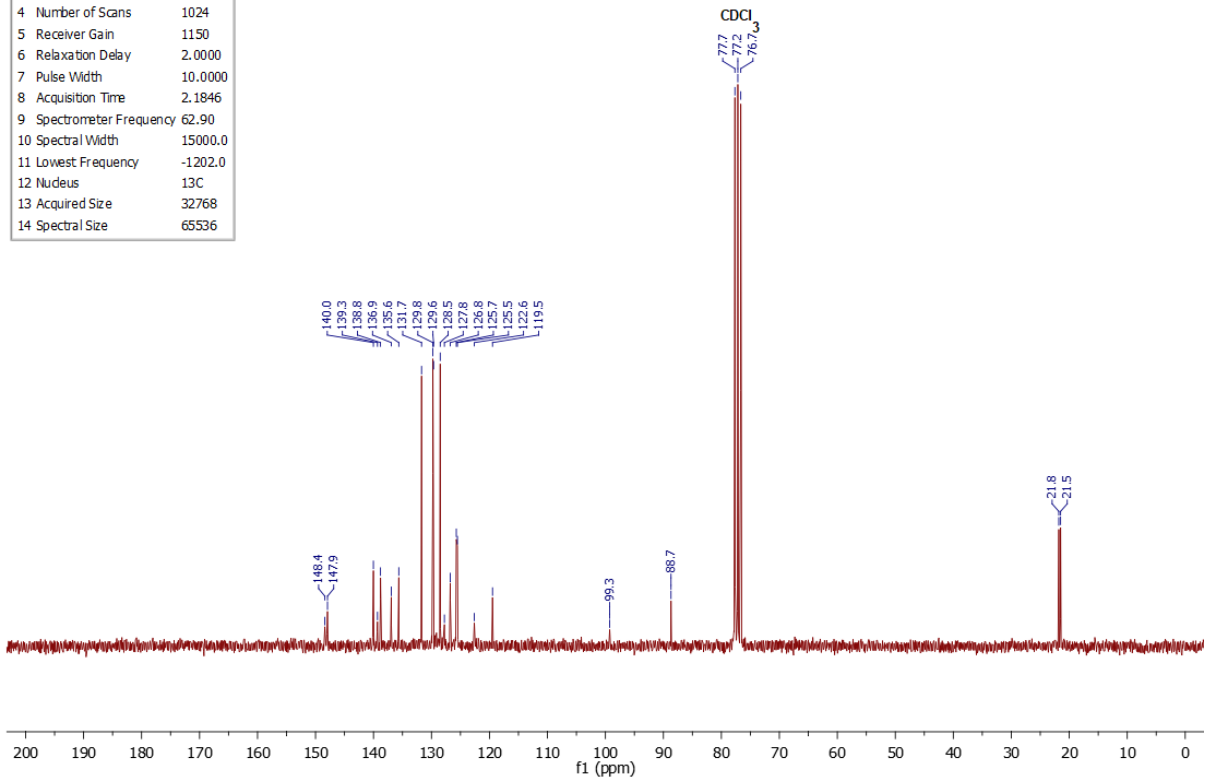

#### 4-(*m*-tolyl)-9-(*m*-tolylethynyl)thieno[3,2-*f*]quinoline (3c)

| Parameter                | Value             |
|--------------------------|-------------------|
| 1 Solvent                | CDCl <sub>3</sub> |
| 2 Temperature            | 298.1             |
| 3 Pulse Sequence         | zg30              |
| 4 Number of Scans        | 16                |
| 5 Receiver Gain          | 362               |
| 6 Relaxation Delay       | 1.0000            |
| 7 Pulse Width            | 10.0000           |
| 8 Acquisition Time       | 6.3439            |
| 9 Spectrometer Frequency | 250.13            |
| 10 Spectral Width        | 5165.3            |
| 11 Lowest Frequency      | -1038.2           |
| 12 Nucleus               | <sup>1</sup> H    |
| 13 Acquired Size         | 32768             |
| 14 Spectral Size         | 65536             |

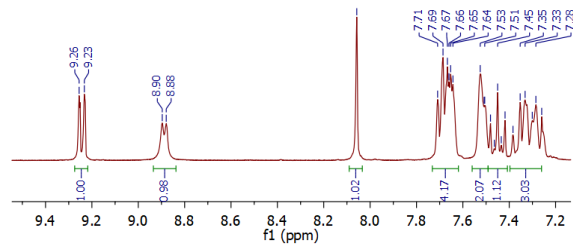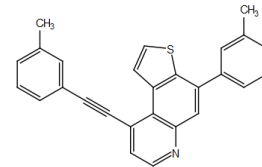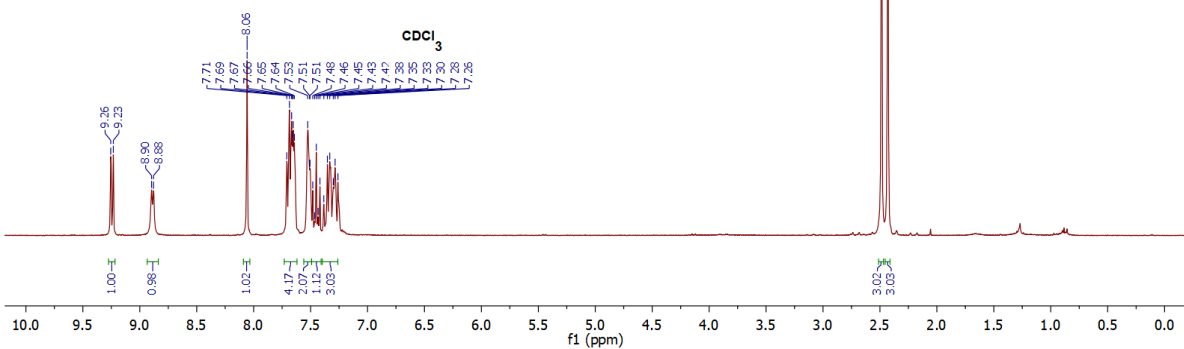

| Parameter                | Value             |
|--------------------------|-------------------|
| 1 Solvent                | CDCl <sub>3</sub> |
| 2 Temperature            | 298.0             |
| 3 Pulse Sequence         | zgpg30            |
| 4 Number of Scans        | 1024              |
| 5 Receiver Gain          | 912               |
| 6 Relaxation Delay       | 2.0000            |
| 7 Pulse Width            | 10.0000           |
| 8 Acquisition Time       | 2.1846            |
| 9 Spectrometer Frequency | 62.90             |
| 10 Spectral Width        | 15000.0           |
| 11 Lowest Frequency      | -1204.0           |
| 12 Nucleus               | <sup>13</sup> C   |
| 13 Acquired Size         | 32768             |
| 14 Spectral Size         | 65536             |

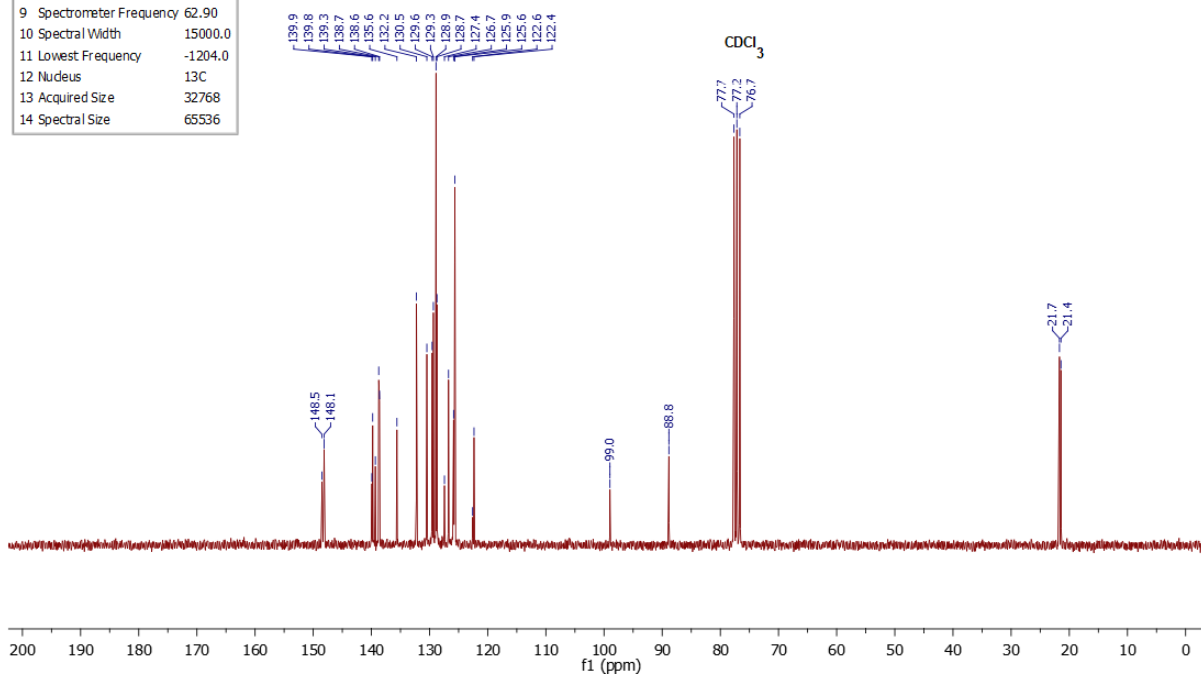

#### 4-(*o*-tolyl)-9-(*o*-tolylethynyl)thieno[3,2-*f*]quinoline (3d)

| Parameter                | Value             |
|--------------------------|-------------------|
| 1 Solvent                | CDCl <sub>3</sub> |
| 2 Temperature            | 298.2             |
| 3 Pulse Sequence         | zg30              |
| 4 Number of Scans        | 16                |
| 5 Receiver Gain          | 101               |
| 6 Relaxation Delay       | 1.0000            |
| 7 Pulse Width            | 8.0000            |
| 8 Acquisition Time       | 3.2768            |
| 9 Spectrometer Frequency | 500.13            |
| 10 Spectral Width        | 10000.0           |
| 11 Lowest Frequency      | -1923.7           |
| 12 Nucleus               | <sup>1</sup> H    |
| 13 Acquired Size         | 32768             |
| 14 Spectral Size         | 65536             |

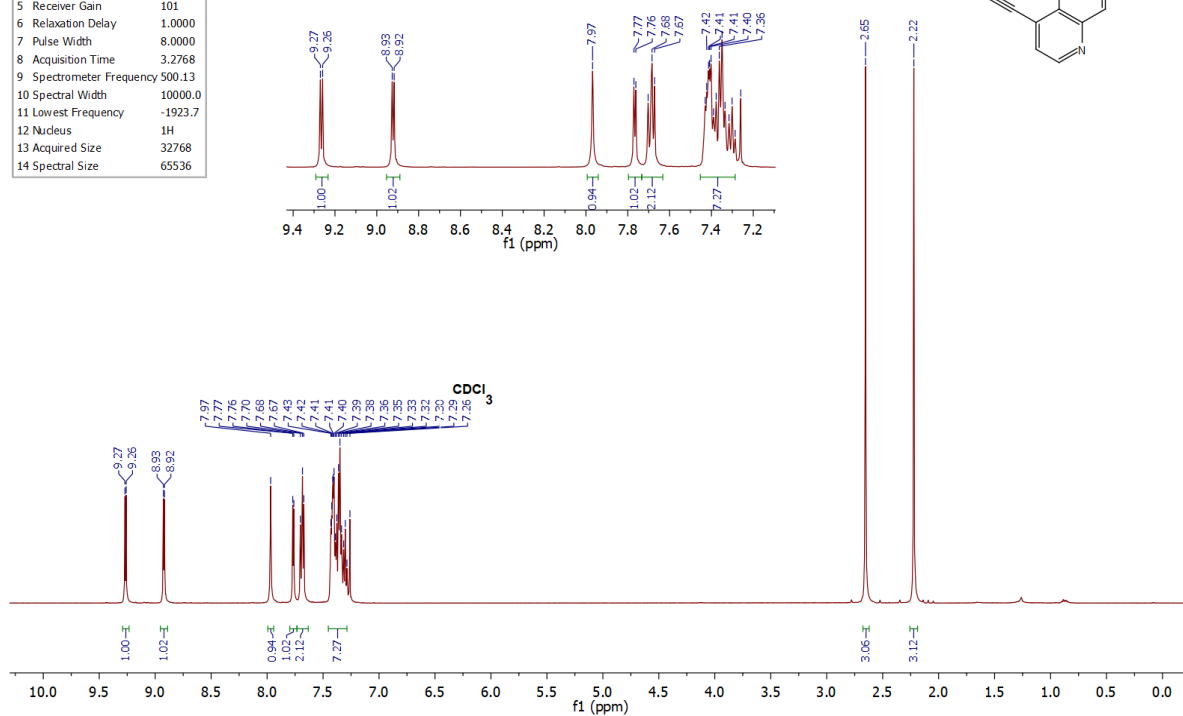

| Parameter                | Value             |
|--------------------------|-------------------|
| 1 Solvent                | CDCl <sub>3</sub> |
| 2 Temperature            | 298.2             |
| 3 Pulse Sequence         | zgpg30            |
| 4 Number of Scans        | 1024              |
| 5 Receiver Gain          | 101               |
| 6 Relaxation Delay       | 2.0000            |
| 7 Pulse Width            | 10.0000           |
| 8 Acquisition Time       | 1.0879            |
| 9 Spectrometer Frequency | 125.76            |
| 10 Spectral Width        | 30120.5           |
| 11 Lowest Frequency      | -2468.5           |
| 12 Nucleus               | <sup>13</sup> C   |
| 13 Acquired Size         | 32768             |
| 14 Spectral Size         | 32768             |

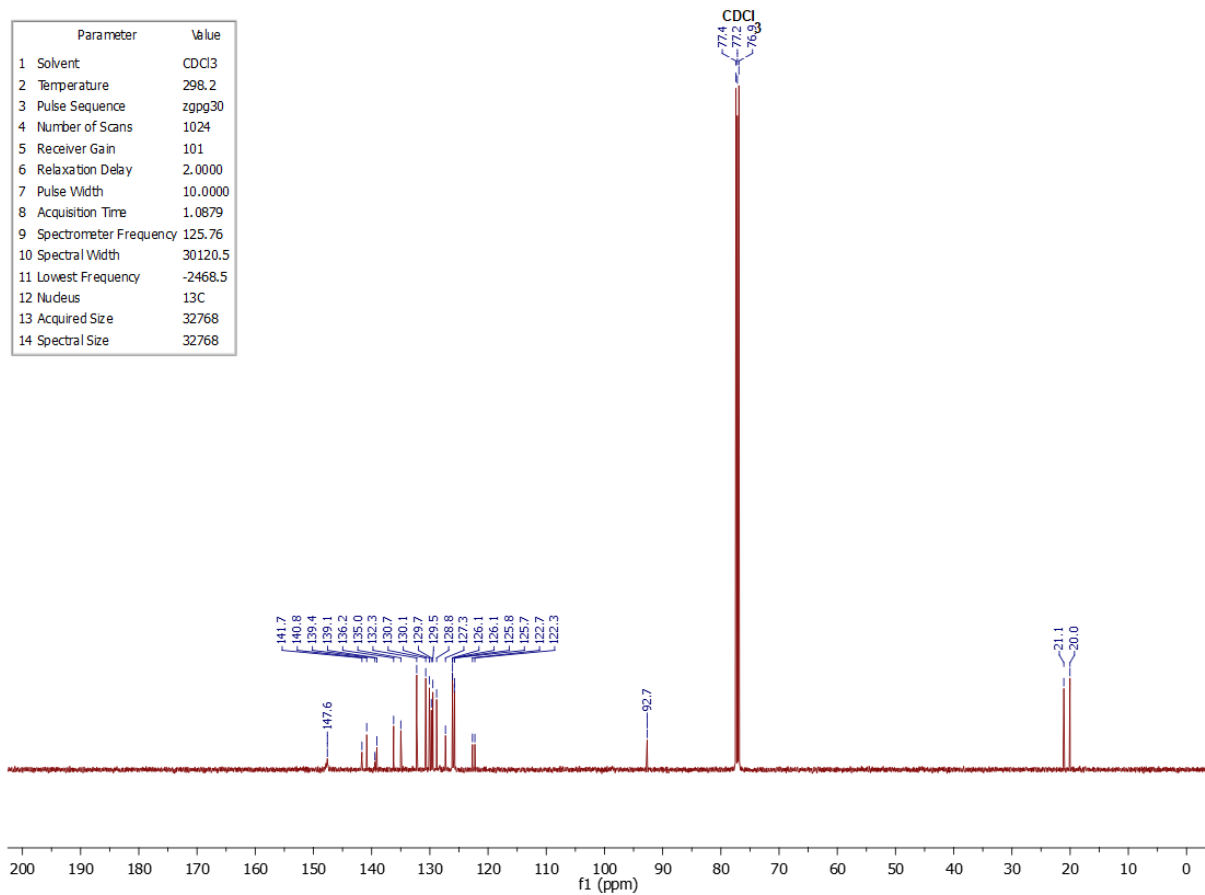

#### 4-(4-fluorophenyl)-9-((4-fluorophenyl)ethynyl)thieno[3,2-f]quinoline (3e)

| Parameter                | Value             |
|--------------------------|-------------------|
| 1 Solvent                | CDCl <sub>3</sub> |
| 2 Temperature            | 298.2             |
| 3 Pulse Sequence         | zg30              |
| 4 Number of Scans        | 16                |
| 5 Receiver Gain          | 203               |
| 6 Relaxation Delay       | 2.0000            |
| 7 Pulse Width            | 10.0000           |
| 8 Acquisition Time       | 5.2954            |
| 9 Spectrometer Frequency | 300.13            |
| 10 Spectral Width        | 6188.1            |
| 11 Lowest Frequency      | -1246.2           |
| 12 Nucleus               | <sup>1</sup> H    |
| 13 Acquired Size         | 32768             |
| 14 Spectral Size         | 65536             |

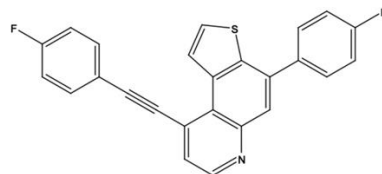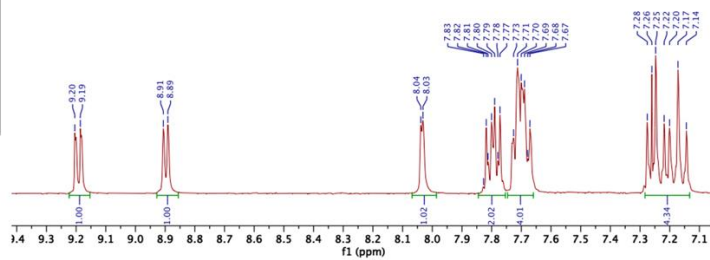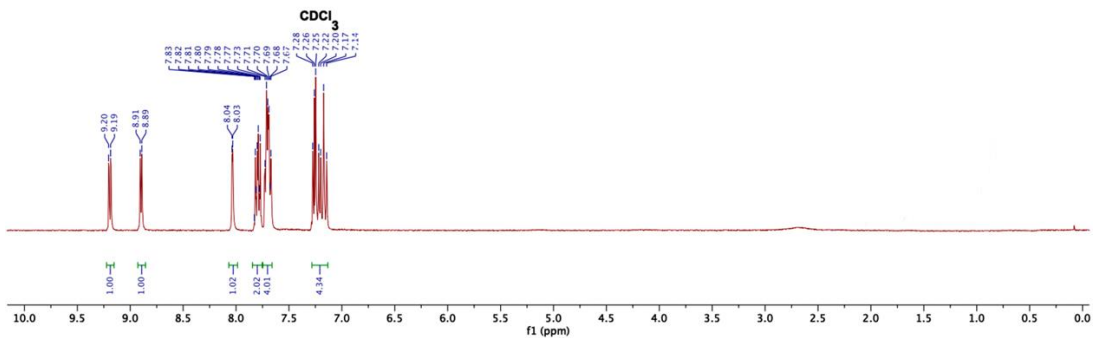

| Parameter                | Value             |
|--------------------------|-------------------|
| 1 Solvent                | CDCl <sub>3</sub> |
| 2 Temperature            | 298.3             |
| 3 Pulse Sequence         | zgfhgqn           |
| 4 Number of Scans        | 64                |
| 5 Receiver Gain          | 2050              |
| 6 Relaxation Delay       | 1.0000            |
| 7 Pulse Width            | 10.0000           |
| 8 Acquisition Time       | 0.9787            |
| 9 Spectrometer Frequency | 282.40            |
| 10 Spectral Width        | 66964.3           |
| 11 Lowest Frequency      | -61722.4          |
| 12 Nucleus               | 19F               |
| 13 Acquired Size         | 65536             |
| 14 Spectral Size         | 131072            |

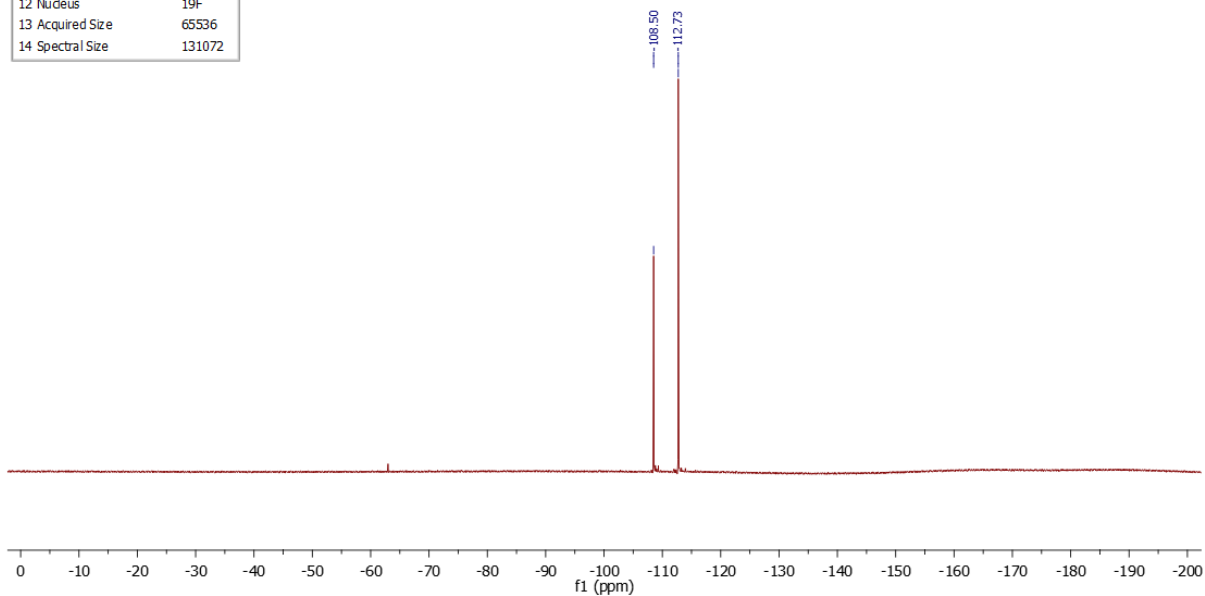

| Parameter                | Value             |
|--------------------------|-------------------|
| 1 Solvent                | CDCl <sub>3</sub> |
| 2 Temperature            | 298.2             |
| 3 Pulse Sequence         | zpgp30            |
| 4 Number of Scans        | 1024              |
| 5 Receiver Gain          | 2050              |
| 6 Relaxation Delay       | 2.0000            |
| 7 Pulse Width            | 10.0000           |
| 8 Acquisition Time       | 1.8176            |
| 9 Spectrometer Frequency | 75.47             |
| 10 Spectral Width        | 18028.8           |
| 11 Lowest Frequency      | -1457.5           |
| 12 Nucleus               | 13C               |
| 13 Acquired Size         | 32768             |
| 14 Spectral Size         | 65536             |

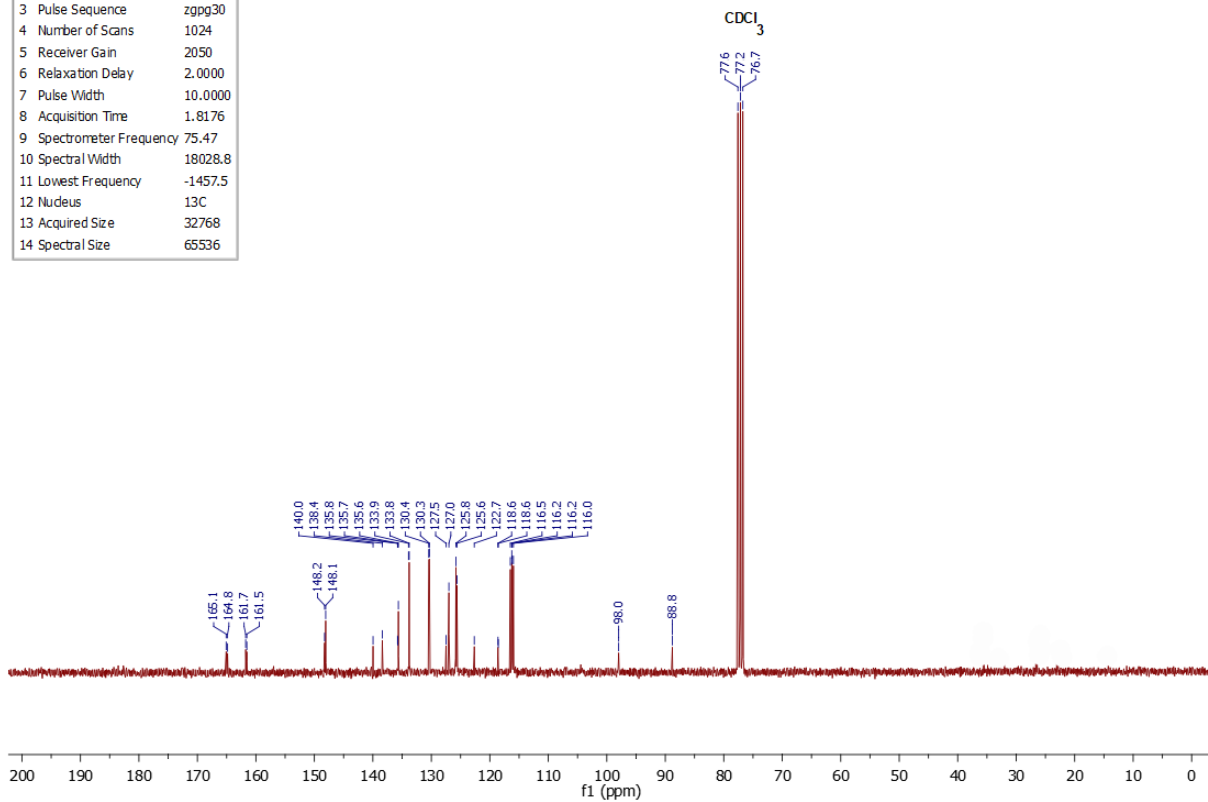

### 4-(thiophen-3-yl)-9-(thiophen-3-ylethynyl)thieno[3,2-f]quinoline (3h)

| Parameter                | Value             |
|--------------------------|-------------------|
| 1 Solvent                | CDCl <sub>3</sub> |
| 2 Temperature            | 298.2             |
| 3 Pulse Sequence         | zg30              |
| 4 Number of Scans        | 16                |
| 5 Receiver Gain          | 362               |
| 6 Relaxation Delay       | 1.0000            |
| 7 Pulse Width            | 10.0000           |
| 8 Acquisition Time       | 6.3439            |
| 9 Spectrometer Frequency | 250.13            |
| 10 Spectral Width        | 5165.3            |
| 11 Lowest Frequency      | -1038.2           |
| 12 Nucleus               | <sup>1</sup> H    |
| 13 Acquired Size         | 32768             |
| 14 Spectral Size         | 65536             |

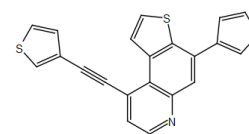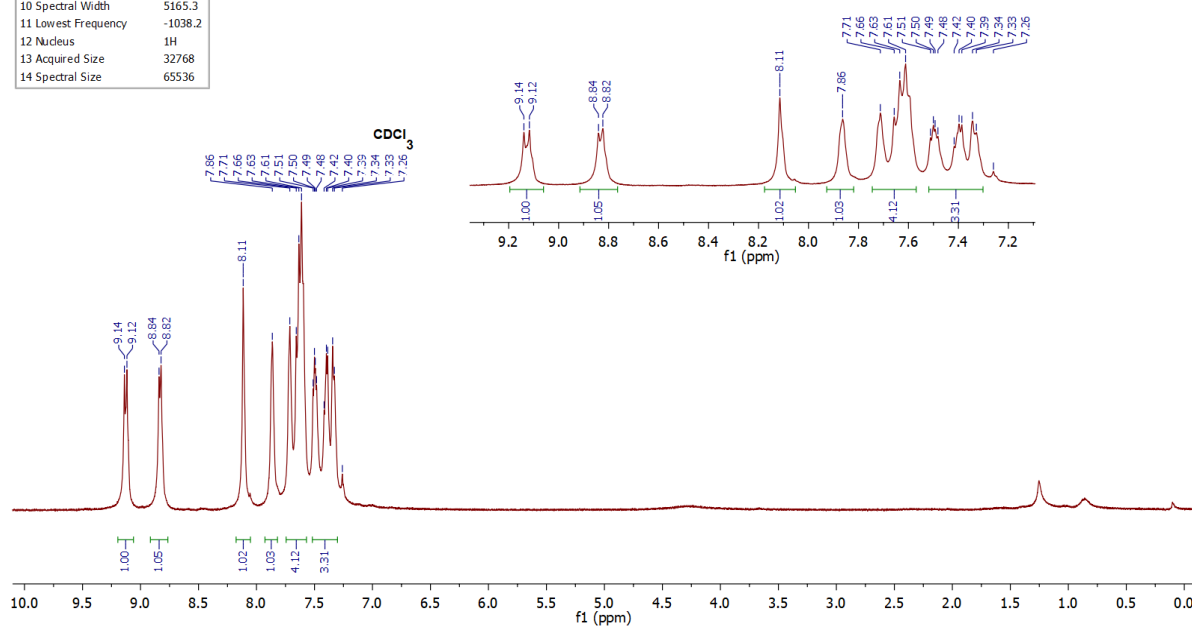

| Parameter                | Value             |
|--------------------------|-------------------|
| 1 Solvent                | CDCl <sub>3</sub> |
| 2 Temperature            | 298.1             |
| 3 Pulse Sequence         | zgpg30            |
| 4 Number of Scans        | 2048              |
| 5 Receiver Gain          | 2050              |
| 6 Relaxation Delay       | 2.0000            |
| 7 Pulse Width            | 10.0000           |
| 8 Acquisition Time       | 2.1846            |
| 9 Spectrometer Frequency | 62.90             |
| 10 Spectral Width        | 15000.0           |
| 11 Lowest Frequency      | -1205.4           |
| 12 Nucleus               | <sup>13</sup> C   |
| 13 Acquired Size         | 32768             |
| 14 Spectral Size         | 65536             |

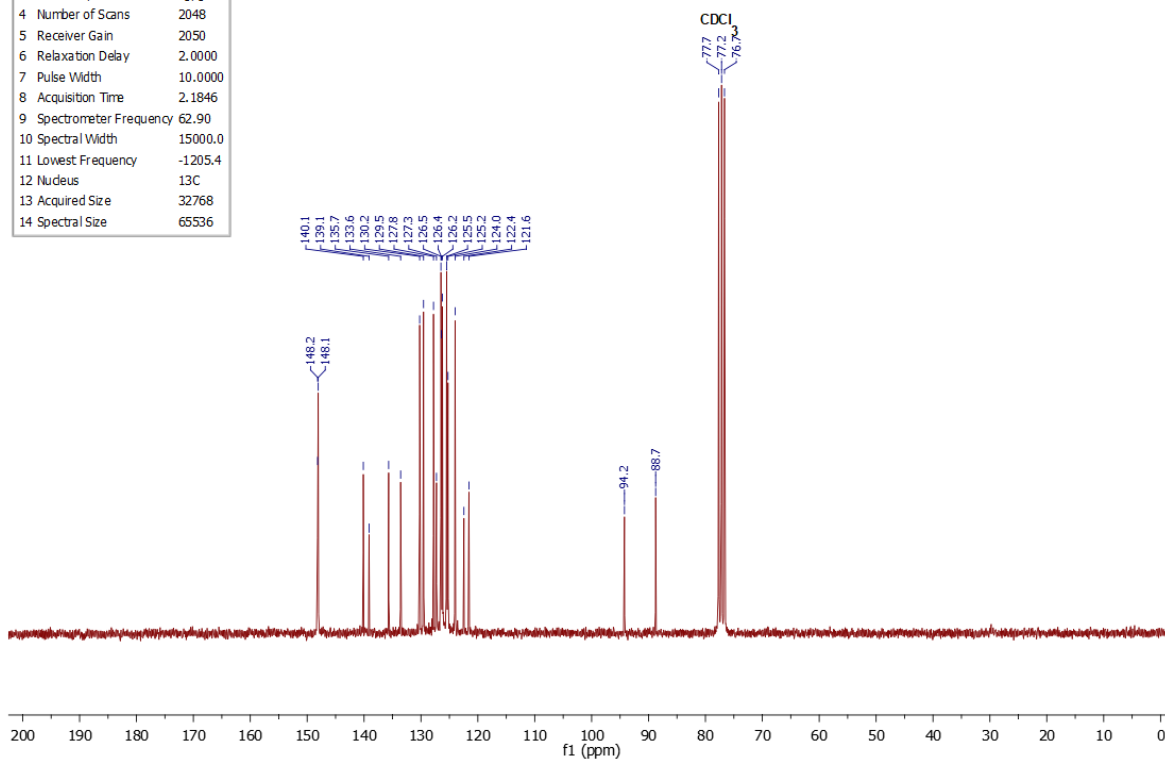

### 4-(9-((4-(dimethylamino)phenyl)ethynyl)thieno[3,2-f]quinolin-4-yl)-N,N-dimethylaniline (3j)

| Parameter                | Value             |
|--------------------------|-------------------|
| 1 Solvent                | CDCl <sub>3</sub> |
| 2 Temperature            | 298.2             |
| 3 Pulse Sequence         | zg30              |
| 4 Number of Scans        | 16                |
| 5 Receiver Gain          | 322               |
| 6 Relaxation Delay       | 2.0000            |
| 7 Pulse Width            | 10.0000           |
| 8 Acquisition Time       | 5.2954            |
| 9 Spectrometer Frequency | 300.13            |
| 10 Spectral Width        | 6188.1            |
| 11 Lowest Frequency      | -1246.4           |
| 12 Nucleus               | <sup>1</sup> H    |
| 13 Acquired Size         | 32768             |
| 14 Spectral Size         | 65536             |

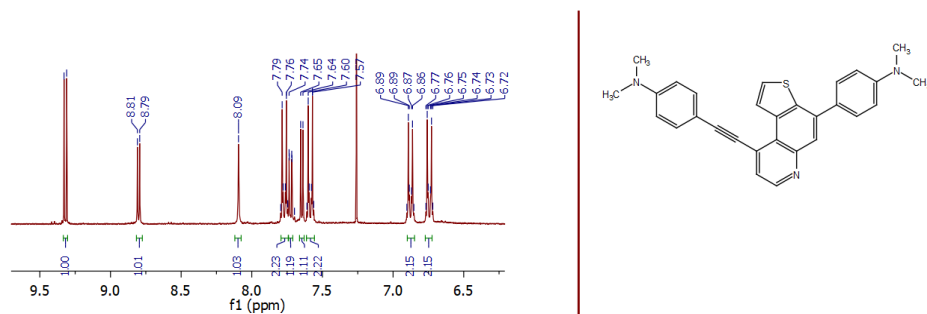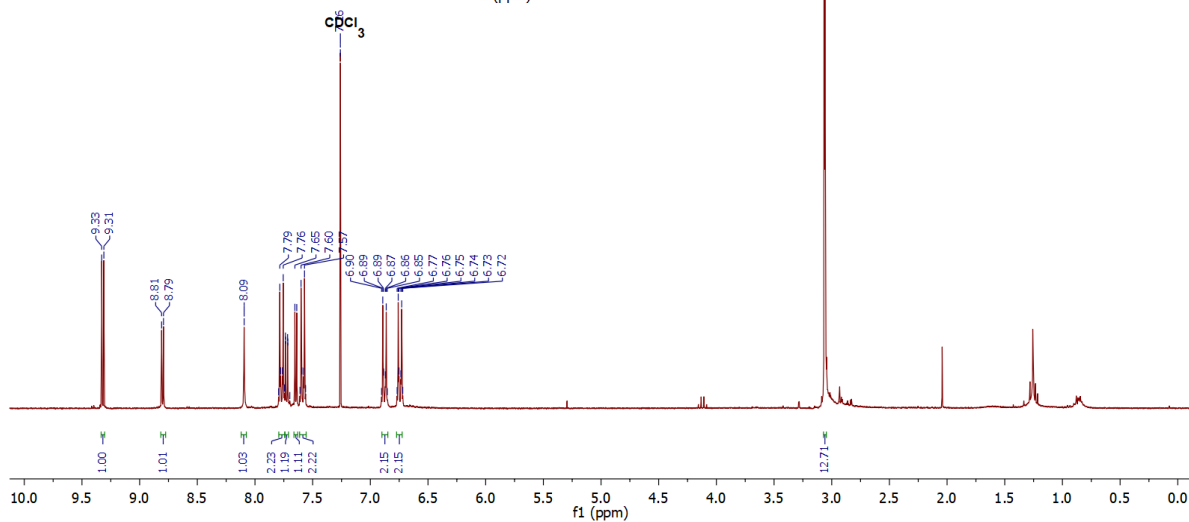

| Parameter                | Value             |
|--------------------------|-------------------|
| 1 Solvent                | CDCl <sub>3</sub> |
| 2 Temperature            | 298.2             |
| 3 Pulse Sequence         | zpgg30            |
| 4 Number of Scans        | 1024              |
| 5 Receiver Gain          | 2050              |
| 6 Relaxation Delay       | 2.0000            |
| 7 Pulse Width            | 10.0000           |
| 8 Acquisition Time       | 1.8176            |
| 9 Spectrometer Frequency | 75.47             |
| 10 Spectral Width        | 18028.8           |
| 11 Lowest Frequency      | -1457.6           |
| 12 Nucleus               | <sup>13</sup> C   |
| 13 Acquired Size         | 32768             |
| 14 Spectral Size         | 65536             |

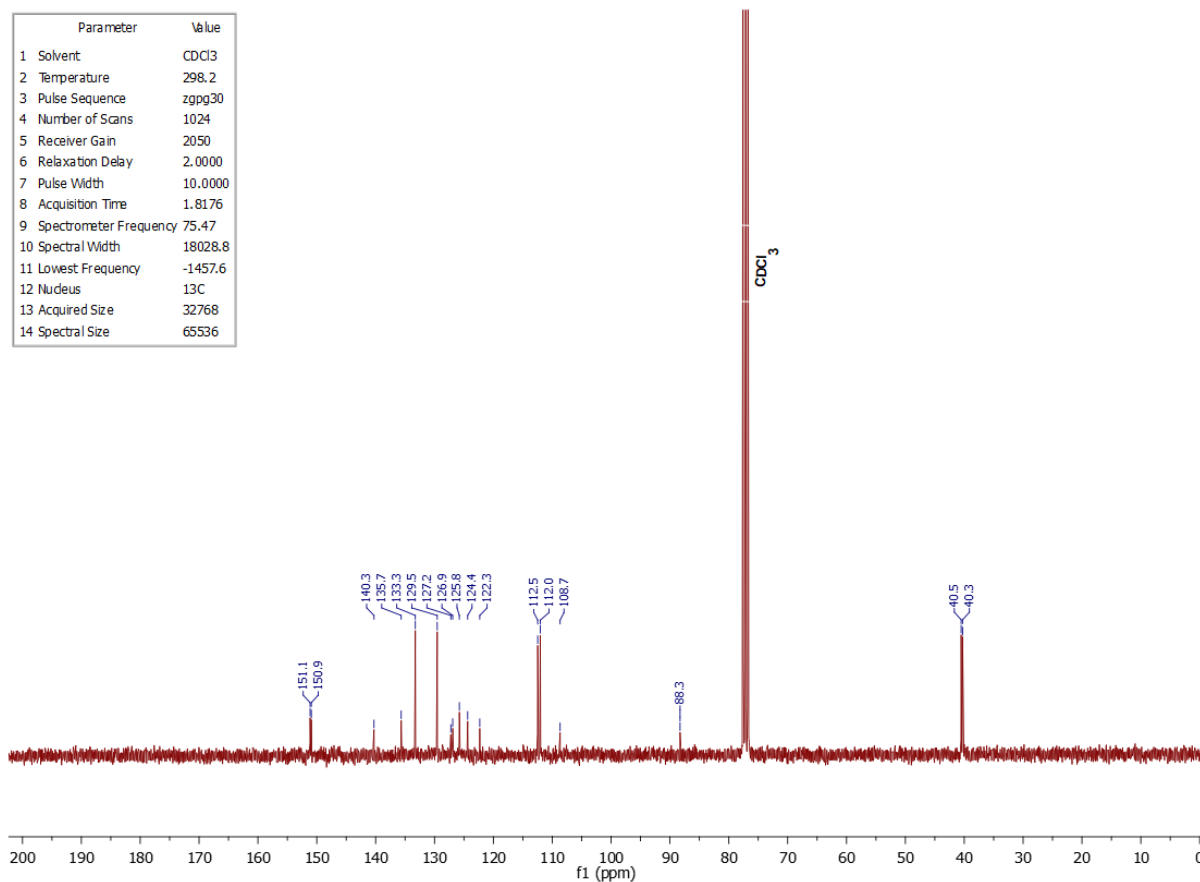

6-phenyl-1-(phenylethynyl)thieno[2,3-*h*]isoquinoline (4a)



| Parameter                | Value             |
|--------------------------|-------------------|
| 1 Solvent                | CDCl <sub>3</sub> |
| 2 Temperature            | 298.2             |
| 3 Pulse Sequence         | zg30              |
| 4 Number of Scans        | 16                |
| 5 Receiver Gain          | 322               |
| 6 Relaxation Delay       | 1.0000            |
| 7 Pulse Width            | 10.0000           |
| 8 Acquisition Time       | 6.3439            |
| 9 Spectrometer Frequency | 250.13            |
| 10 Spectral Width        | 5165.3            |
| 11 Lowest Frequency      | -1038.4           |
| 12 Nucleus               | <sup>1</sup> H    |
| 13 Acquired Size         | 32768             |
| 14 Spectral Size         | 65536             |

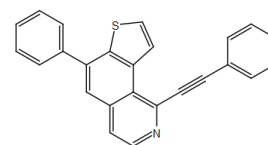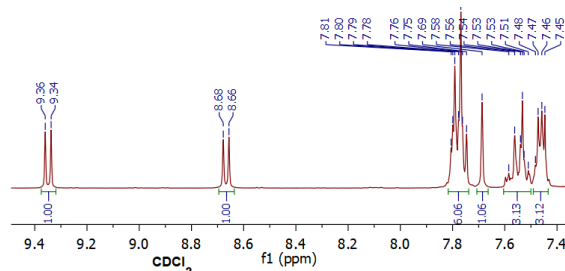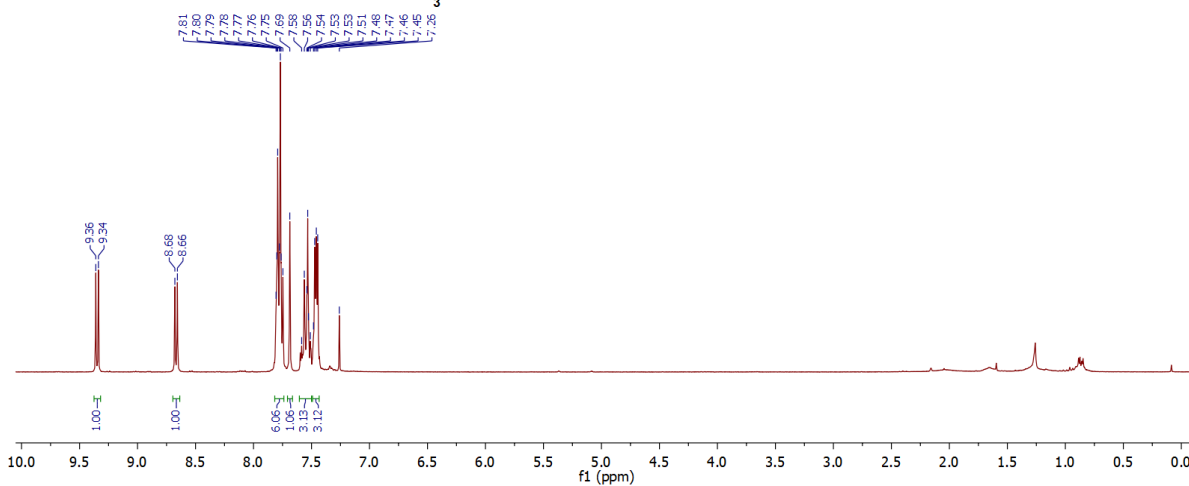

| Parameter                | Value             |
|--------------------------|-------------------|
| 1 Solvent                | CDCl <sub>3</sub> |
| 2 Temperature            | 297.8             |
| 3 Pulse Sequence         | zgpg30            |
| 4 Number of Scans        | 1024              |
| 5 Receiver Gain          | 2050              |
| 6 Relaxation Delay       | 2.0000            |
| 7 Pulse Width            | 10.0000           |
| 8 Acquisition Time       | 2.1846            |
| 9 Spectrometer Frequency | 62.90             |
| 10 Spectral Width        | 15000.0           |
| 11 Lowest Frequency      | -1201.6           |
| 12 Nucleus               | <sup>13</sup> C   |
| 13 Acquired Size         | 32768             |
| 14 Spectral Size         | 65536             |

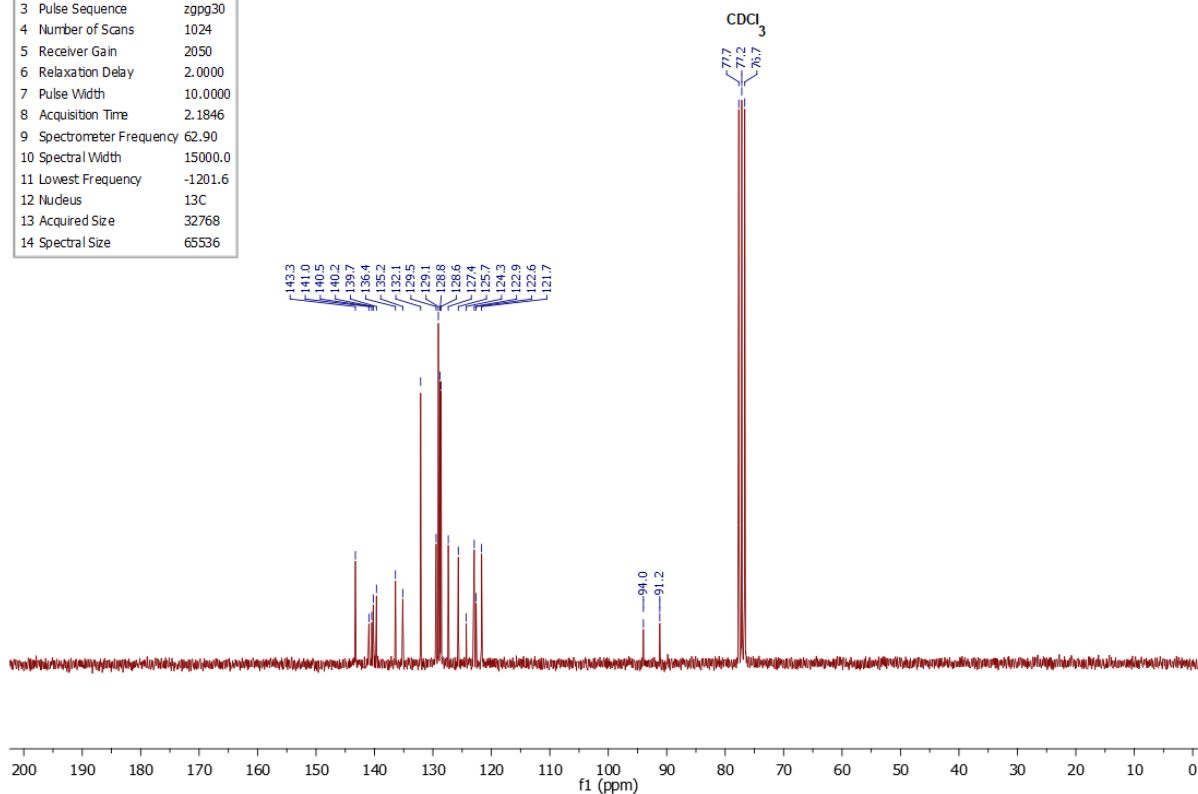

6-(*m*-tolyl)-1-(*m*-tolylethynyl)thieno[2,3-*h*]isoquinoline (4c)

| Parameter                | Value   |
|--------------------------|---------|
| 1 Solvent                | CDCl3   |
| 2 Temperature            | 298.1   |
| 3 Pulse Sequence         | zg30    |
| 4 Number of Scans        | 16      |
| 5 Receiver Gain          | 724     |
| 6 Relaxation Delay       | 1.0000  |
| 7 Pulse Width            | 10.0000 |
| 8 Acquisition Time       | 6.3439  |
| 9 Spectrometer Frequency | 250.13  |
| 10 Spectral Width        | 5165.3  |
| 11 Lowest Frequency      | -1038.7 |
| 12 Nucleus               | 1H      |
| 13 Acquired Size         | 32768   |
| 14 Spectral Size         | 65536   |

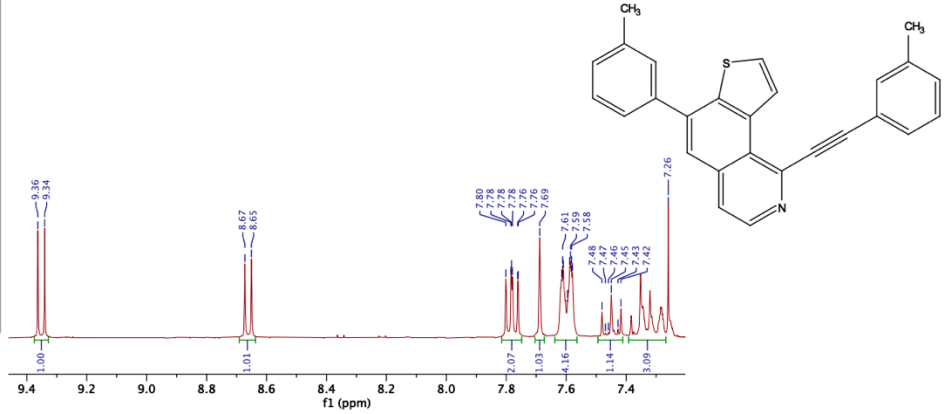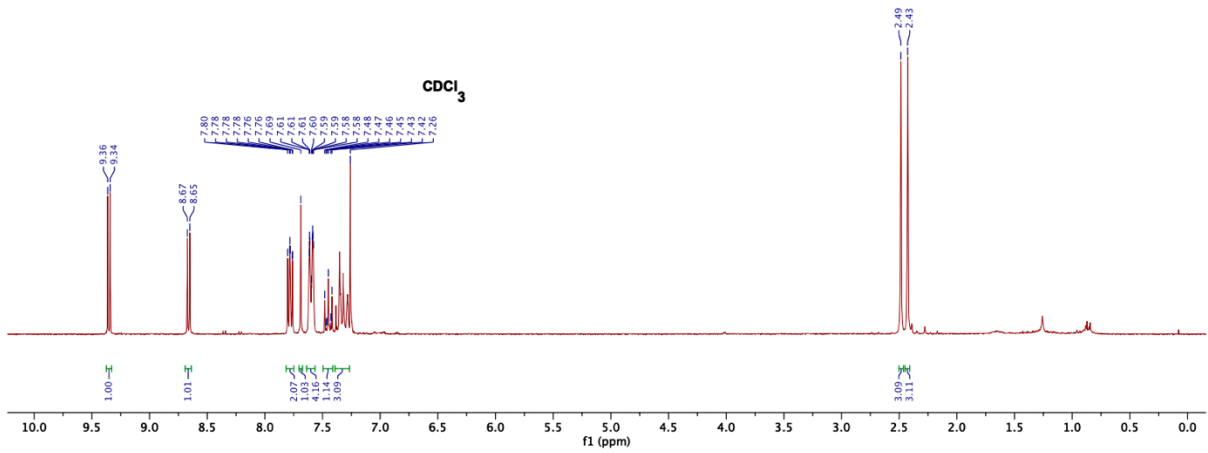

| Parameter                | Value   |
|--------------------------|---------|
| 1 Solvent                | CDCl3   |
| 2 Temperature            | 298.0   |
| 3 Pulse Sequence         | zgpg30  |
| 4 Number of Scans        | 1024    |
| 5 Receiver Gain          | 2050    |
| 6 Relaxation Delay       | 2.0000  |
| 7 Pulse Width            | 10.0000 |
| 8 Acquisition Time       | 2.1846  |
| 9 Spectrometer Frequency | 62.90   |
| 10 Spectral Width        | 15000.0 |
| 11 Lowest Frequency      | -1201.3 |
| 12 Nucleus               | 13C     |
| 13 Acquired Size         | 32768   |
| 14 Spectral Size         | 65536   |

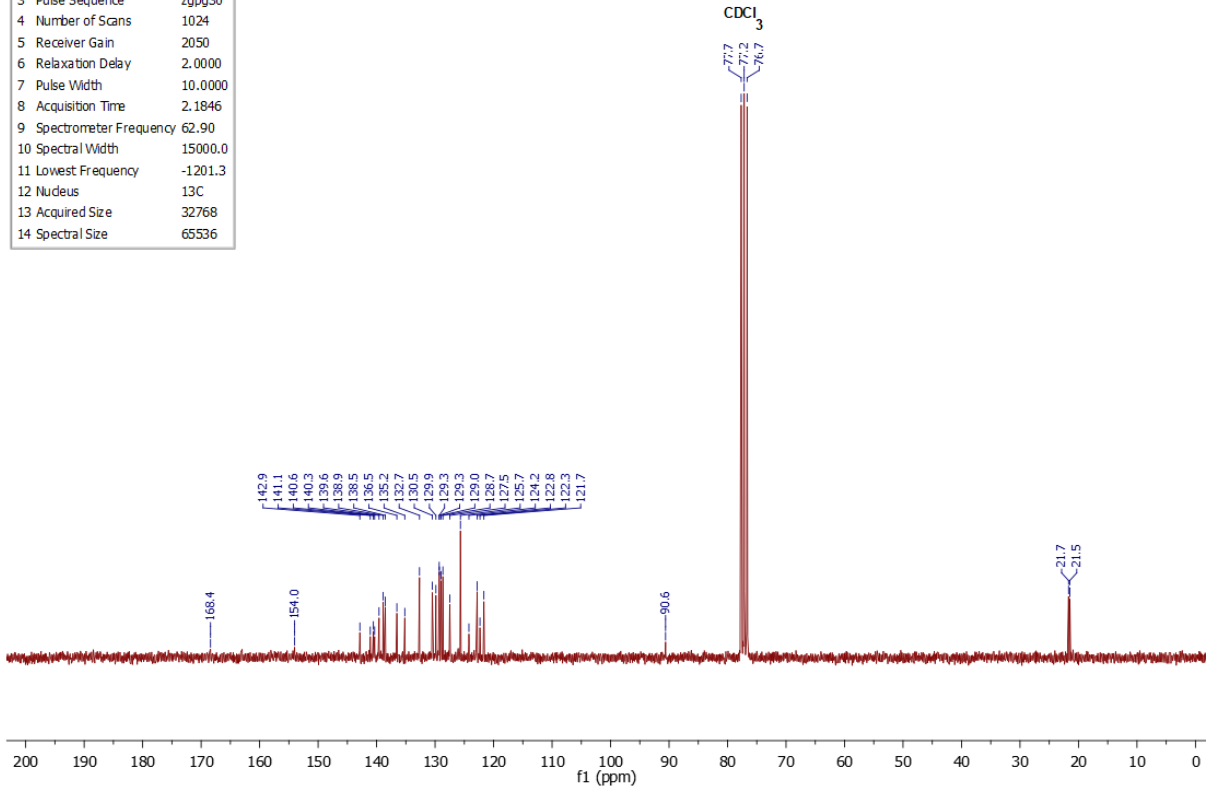

### 4-phenyl-11-(phenylethynyl)thieno[3,2-a]acridine (7a)

| Parameter                | Value   |
|--------------------------|---------|
| 1 Solvent                | CDCl3   |
| 2 Temperature            | 298.1   |
| 3 Pulse Sequence         | zg30    |
| 4 Number of Scans        | 16      |
| 5 Receiver Gain          | 362     |
| 6 Relaxation Delay       | 1.0000  |
| 7 Pulse Width            | 10.0000 |
| 8 Acquisition Time       | 6.3439  |
| 9 Spectrometer Frequency | 250.13  |
| 10 Spectral Width        | 5165.3  |
| 11 Lowest Frequency      | -1038.3 |
| 12 Nucleus               | 1H      |
| 13 Acquired Size         | 32768   |
| 14 Spectral Size         | 65536   |

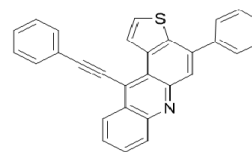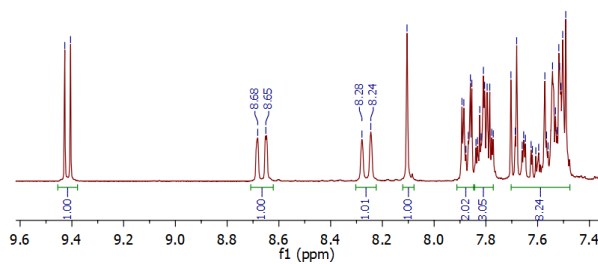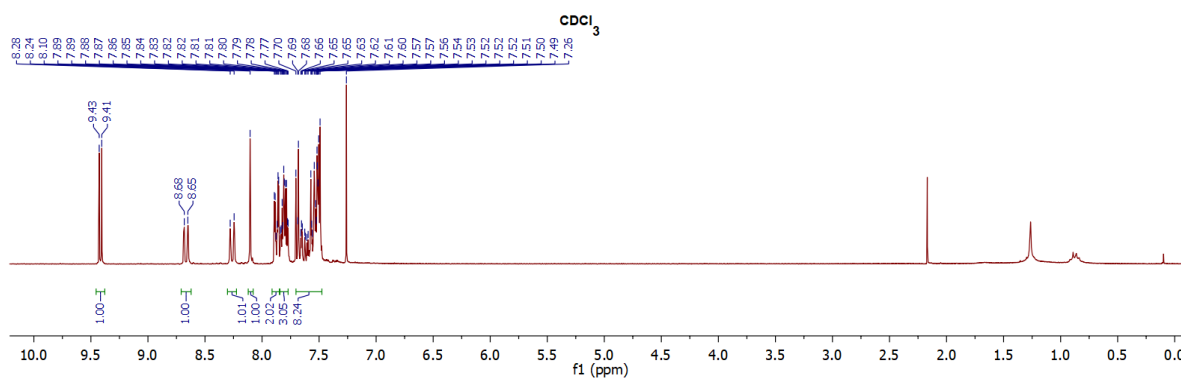

| Parameter                | Value   |
|--------------------------|---------|
| 1 Solvent                | CDCl3   |
| 2 Temperature            | 298.0   |
| 3 Pulse Sequence         | zgpg30  |
| 4 Number of Scans        | 1024    |
| 5 Receiver Gain          | 1620    |
| 6 Relaxation Delay       | 2.0000  |
| 7 Pulse Width            | 10.0000 |
| 8 Acquisition Time       | 2.1846  |
| 9 Spectrometer Frequency | 62.90   |
| 10 Spectral Width        | 15000.0 |
| 11 Lowest Frequency      | -1202.6 |
| 12 Nucleus               | 13C     |
| 13 Acquired Size         | 32768   |
| 14 Spectral Size         | 65536   |

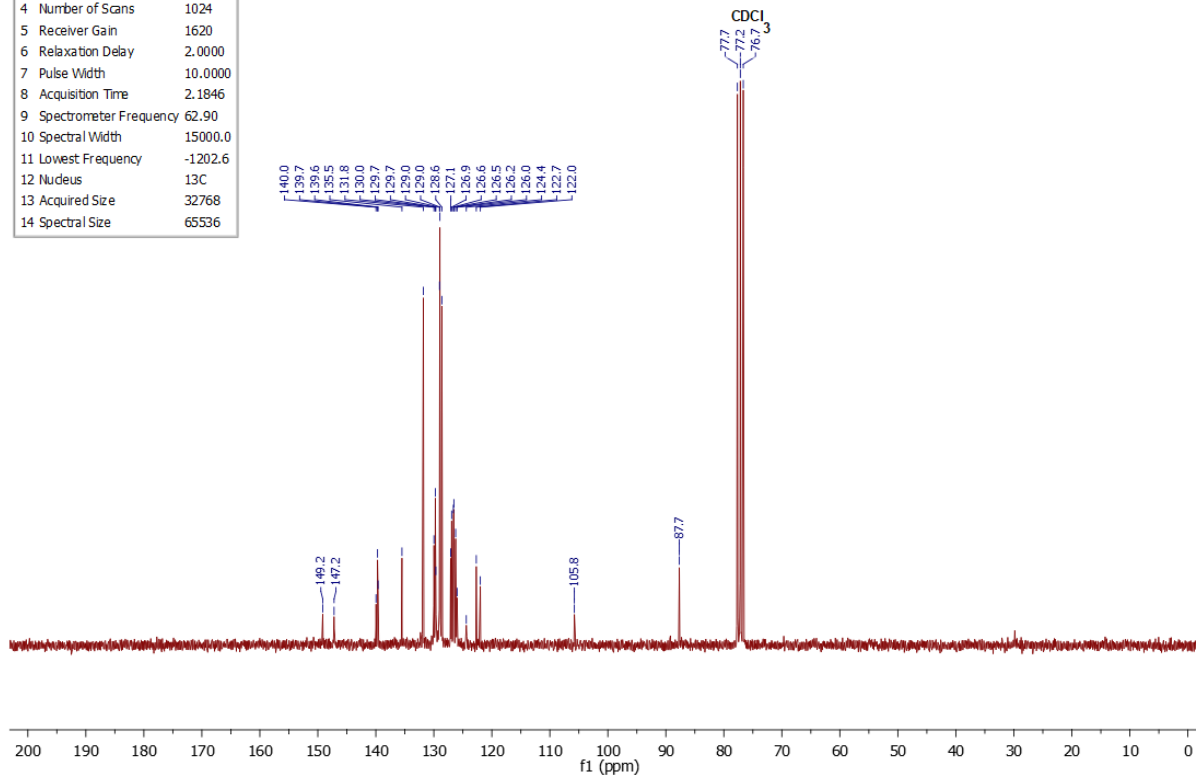

### 4-(4-fluorophenyl)-11-((4-fluorophenyl)ethynyl)thieno[3,2-a]acridine (7b)



| Parameter                | Value             |
|--------------------------|-------------------|
| 1 Solvent                | CDCl <sub>3</sub> |
| 2 Temperature            | 298.1             |
| 3 Pulse Sequence         | zgpg30            |
| 4 Number of Scans        | 2048              |
| 5 Receiver Gain          | 101               |
| 6 Relaxation Delay       | 2.0000            |
| 7 Pulse Width            | 10.0000           |
| 8 Acquisition Time       | 1.0879            |
| 9 Spectrometer Frequency | 125.76            |
| 10 Spectral Width        | 30120.5           |
| 11 Lowest Frequency      | -2471.4           |
| 12 Nucleus               | <sup>13</sup> C   |
| 13 Acquired Size         | 32768             |
| 14 Spectral Size         | 32768             |

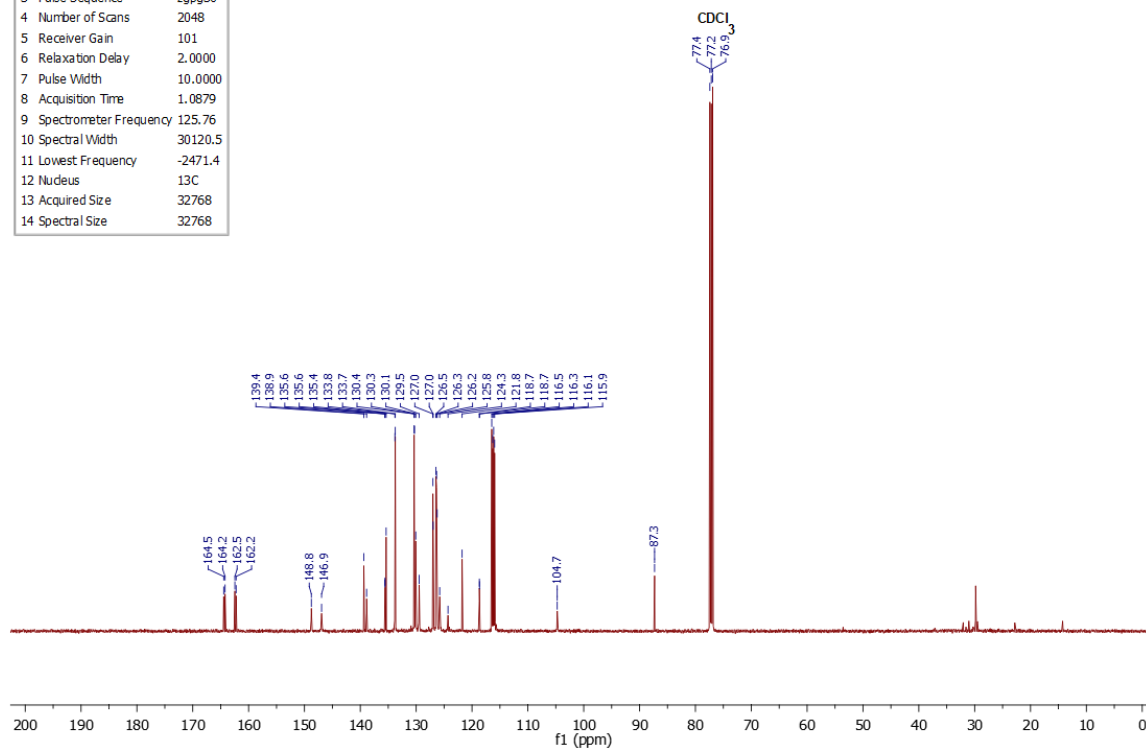

**4-(11-((4-(dimethylamino)phenyl)ethynyl)thieno[3,2-a]acridin-4-yl)-N,N-dimethylaniline (7c)<sup>1</sup>**

<sup>1</sup> NMR spectrum of **7c** contains small amounts of impurities – as desired product **8c** is available directly from **2c** we did not execute repeated purification

| Parameter                | Value             |
|--------------------------|-------------------|
| 1 Solvent                | CDCl <sub>3</sub> |
| 2 Temperature            | 298.2             |
| 3 Pulse Sequence         | zg30              |
| 4 Number of Scans        | 16                |
| 5 Receiver Gain          | 101               |
| 6 Relaxation Delay       | 1.0000            |
| 7 Pulse Width            | 8.0000            |
| 8 Acquisition Time       | 3.2768            |
| 9 Spectrometer Frequency | 500.13            |
| 10 Spectral Width        | 10000.0           |
| 11 Lowest Frequency      | -1963.3           |
| 12 Nucleus               | <sup>1</sup> H    |
| 13 Acquired Size         | 32768             |
| 14 Spectral Size         | 65536             |

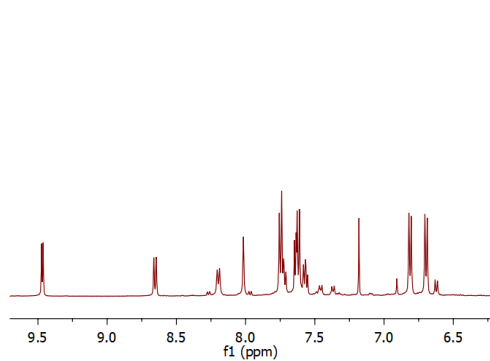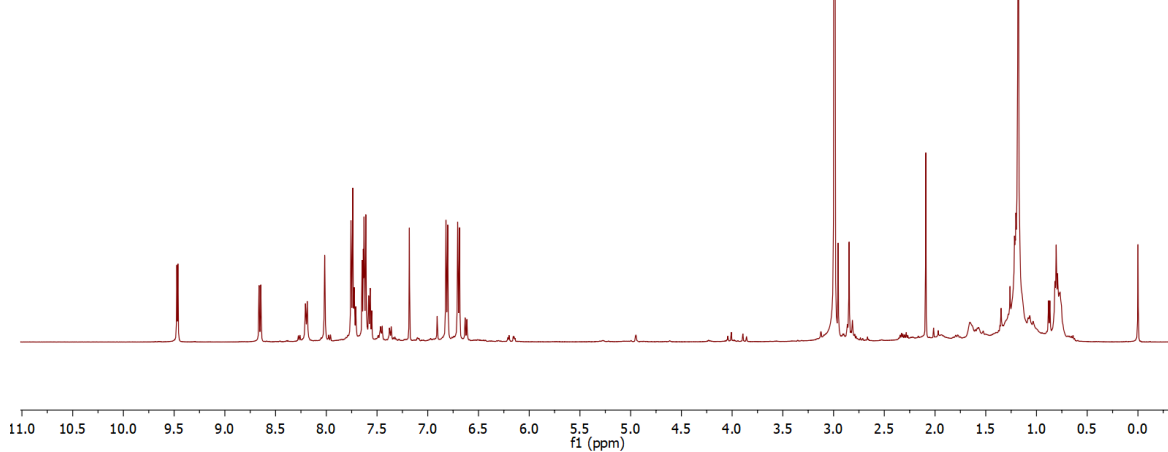

| Parameter                | Value             |
|--------------------------|-------------------|
| 1 Solvent                | CDCl <sub>3</sub> |
| 2 Temperature            | 298.1             |
| 3 Pulse Sequence         | zpgg30            |
| 4 Number of Scans        | 2048              |
| 5 Receiver Gain          | 101.0             |
| 6 Relaxation Delay       | 2.0000            |
| 7 Pulse Width            | 10.0000           |
| 8 Acquisition Time       | 1.0879            |
| 9 Spectrometer Frequency | 125.77            |
| 10 Spectral Width        | 30120.5           |
| 11 Lowest Frequency      | -2489.5           |
| 12 Nucleus               | <sup>13</sup> C   |
| 13 Acquired Size         | 32768             |
| 14 Spectral Size         | 65536             |
| 15 Digital Resolution    | 0.46              |

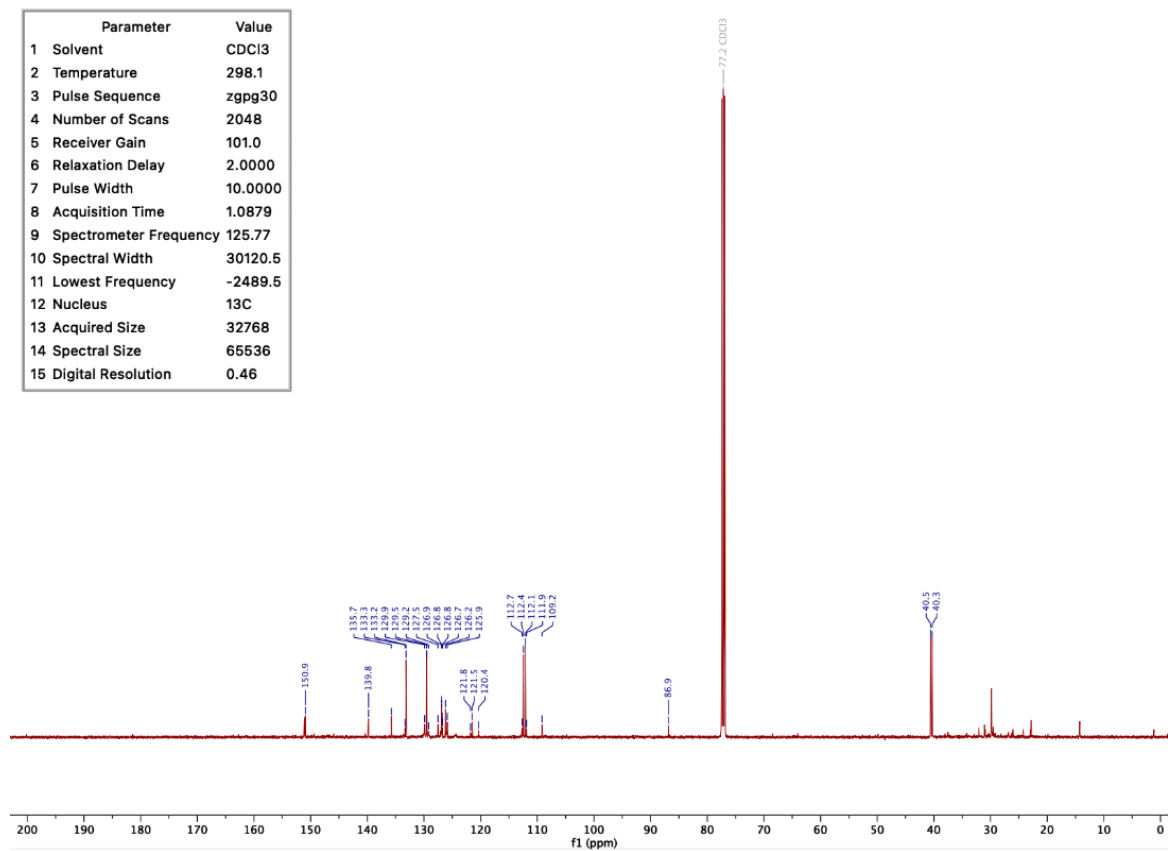

**3,9-diphenylthieno[2',3',4':4,5]naphtho[1,8-*bc*]pyridine (5a)**

| Parameter                | Value   |
|--------------------------|---------|
| 1 Solvent                | CDCl3   |
| 2 Temperature            | 298.2   |
| 3 Pulse Sequence         | zg30    |
| 4 Number of Scans        | 16      |
| 5 Receiver Gain          | 287     |
| 6 Relaxation Delay       | 2.0000  |
| 7 Pulse Width            | 10.0000 |
| 8 Acquisition Time       | 5.2954  |
| 9 Spectrometer Frequency | 300.13  |
| 10 Spectral Width        | 6188.1  |
| 11 Lowest Frequency      | -1246.3 |
| 12 Nucleus               | 1H      |
| 13 Acquired Size         | 32768   |
| 14 Spectral Size         | 65536   |

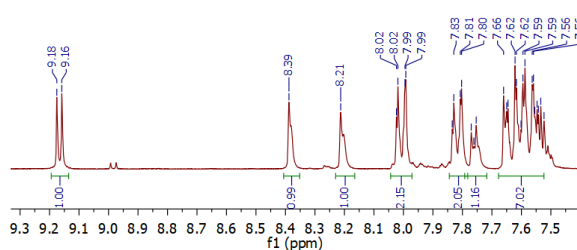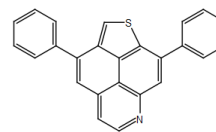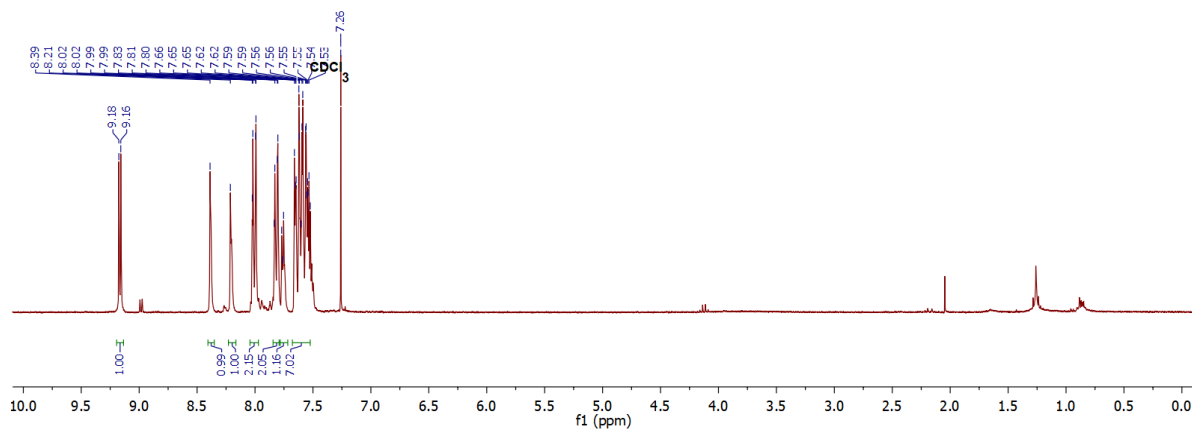

| Parameter                | Value   |
|--------------------------|---------|
| 1 Solvent                | CDCl3   |
| 2 Temperature            | 298.2   |
| 3 Pulse Sequence         | zgpg30  |
| 4 Number of Scans        | 1024    |
| 5 Receiver Gain          | 2050    |
| 6 Relaxation Delay       | 2.0000  |
| 7 Pulse Width            | 10.0000 |
| 8 Acquisition Time       | 1.8176  |
| 9 Spectrometer Frequency | 75.47   |
| 10 Spectral Width        | 18028.8 |
| 11 Lowest Frequency      | -1458.6 |
| 12 Nucleus               | 13C     |
| 13 Acquired Size         | 32768   |
| 14 Spectral Size         | 65536   |

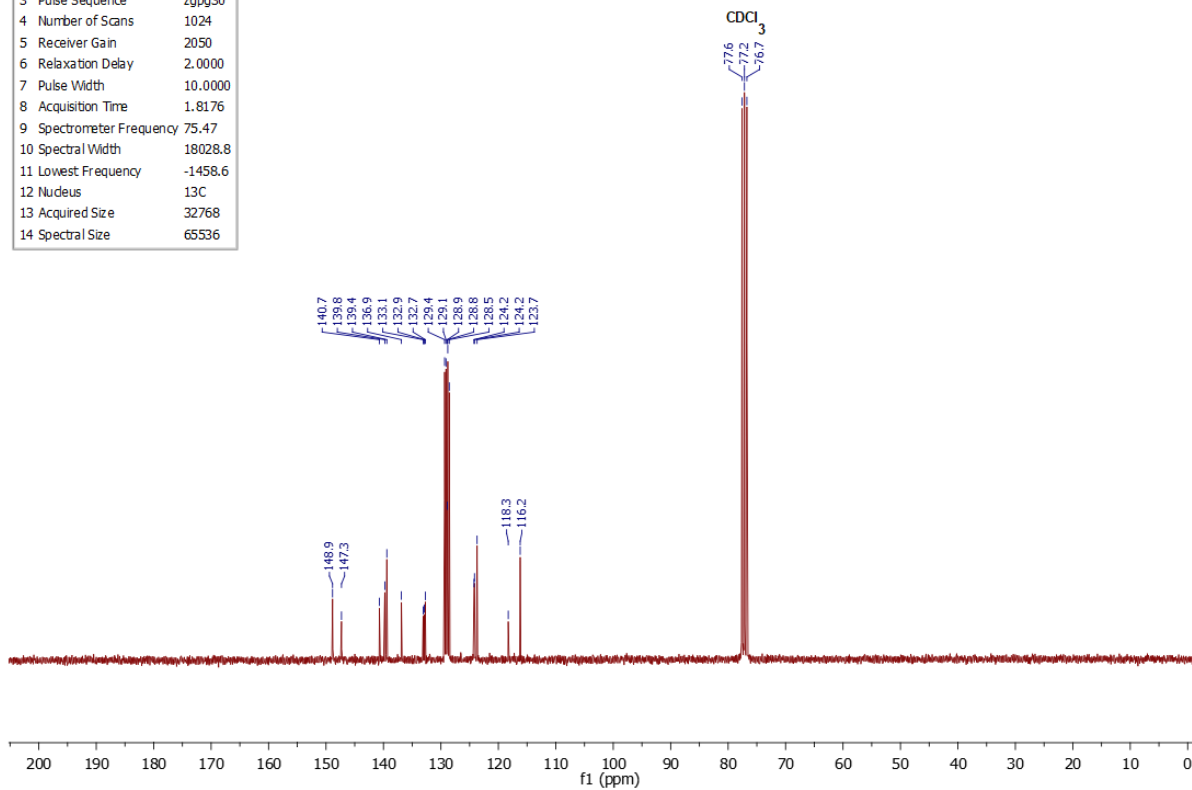

3,9-di-*p*-tolylthieno[2',3',4':4,5]naphtho[1,8-*bc*]pyridine (5b)

| Parameter                | Value   |
|--------------------------|---------|
| 1 Solvent                | CDCl3   |
| 2 Temperature            | 298.2   |
| 3 Pulse Sequence         | zg30    |
| 4 Number of Scans        | 16      |
| 5 Receiver Gain          | 645     |
| 6 Relaxation Delay       | 1.0000  |
| 7 Pulse Width            | 10.0000 |
| 8 Acquisition Time       | 6.3439  |
| 9 Spectrometer Frequency | 250.13  |
| 10 Spectral Width        | 5165.3  |
| 11 Lowest Frequency      | -1038.5 |
| 12 Nucleus               | 1H      |
| 13 Acquired Size         | 32768   |
| 14 Spectral Size         | 65536   |

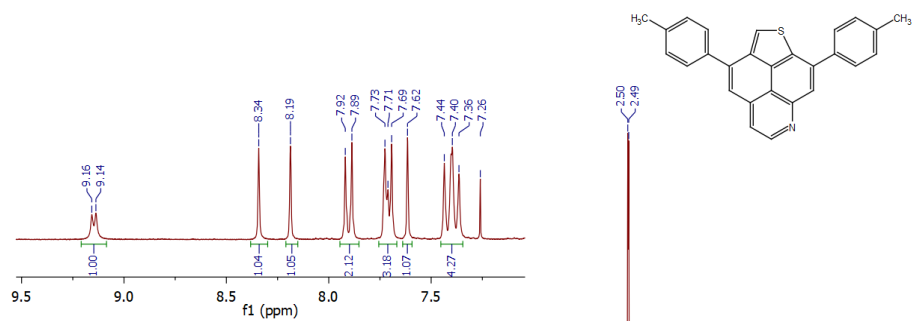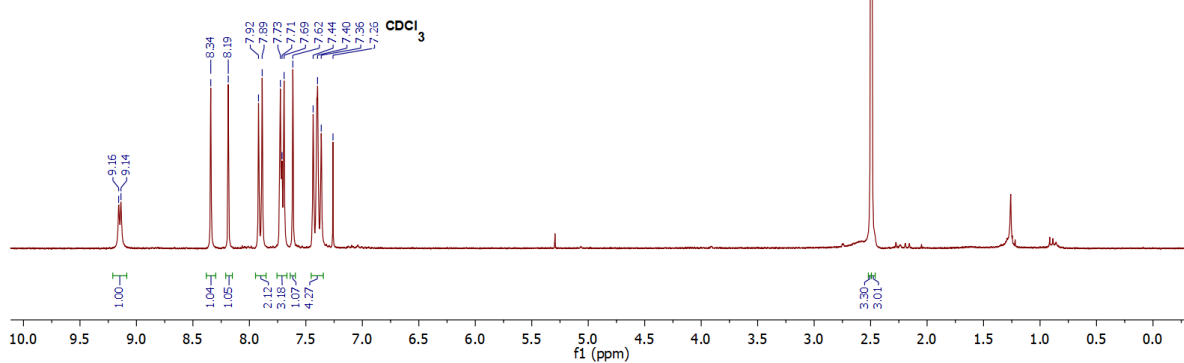

| Parameter                | Value   |
|--------------------------|---------|
| 1 Solvent                | CDCl3   |
| 2 Temperature            | 298.0   |
| 3 Pulse Sequence         | zgpg30  |
| 4 Number of Scans        | 1024    |
| 5 Receiver Gain          | 2050    |
| 6 Relaxation Delay       | 2.0000  |
| 7 Pulse Width            | 10.0000 |
| 8 Acquisition Time       | 2.1846  |
| 9 Spectrometer Frequency | 62.90   |
| 10 Spectral Width        | 15000.0 |
| 11 Lowest Frequency      | -1201.8 |
| 12 Nucleus               | 13C     |
| 13 Acquired Size         | 32768   |
| 14 Spectral Size         | 65536   |

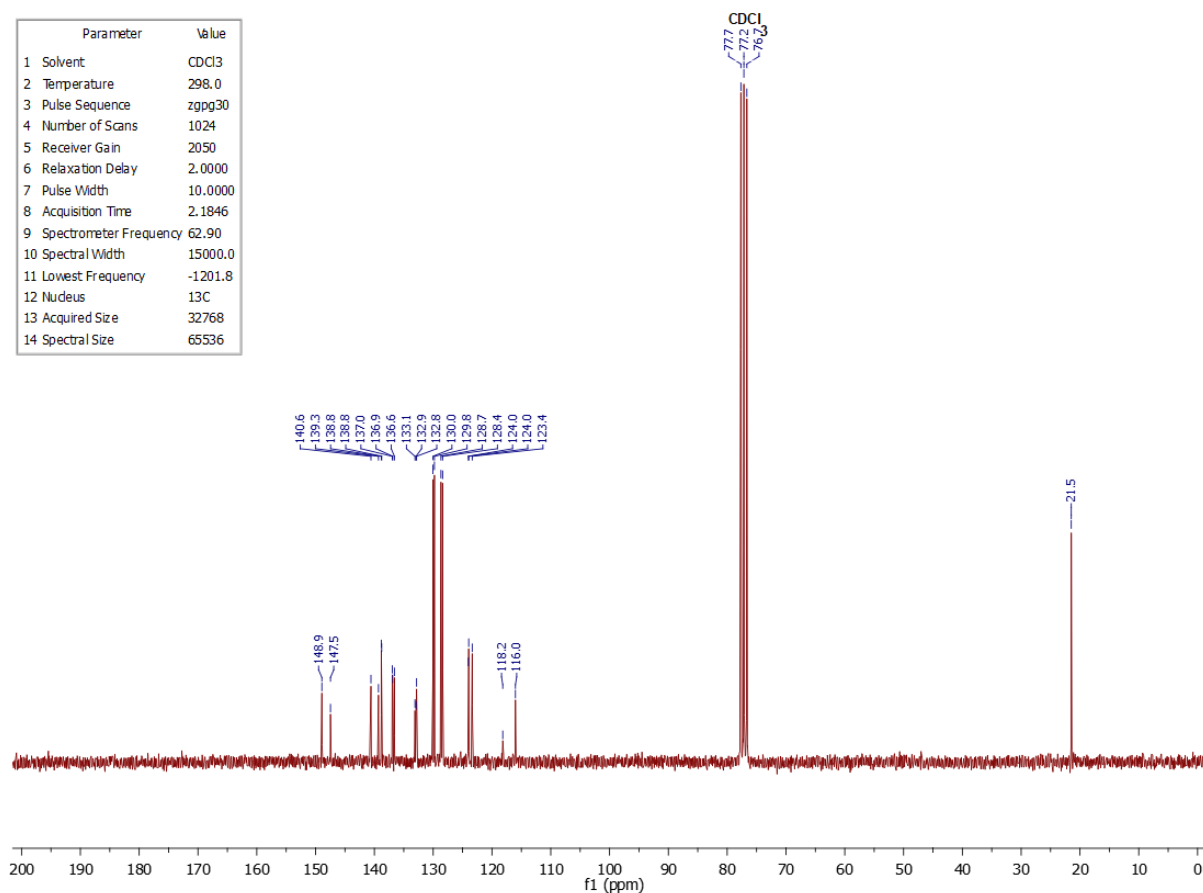

**3,9-di-*m*-tolylthieno[2',3',4':4,5]naphtho[1,8-*bc*]pyridine (5c)**



| Parameter                | Value             |
|--------------------------|-------------------|
| 1 Solvent                | CDCl <sub>3</sub> |
| 2 Temperature            | 298.2             |
| 3 Pulse Sequence         | zg30              |
| 4 Number of Scans        | 16                |
| 5 Receiver Gain          | 362               |
| 6 Relaxation Delay       | 1.0000            |
| 7 Pulse Width            | 10.0000           |
| 8 Acquisition Time       | 6.3439            |
| 9 Spectrometer Frequency | 250.13            |
| 10 Spectral Width        | 5165.3            |
| 11 Lowest Frequency      | -1038.4           |
| 12 Nucleus               | <sup>1</sup> H    |
| 13 Acquired Size         | 32768             |
| 14 Spectral Size         | 65536             |

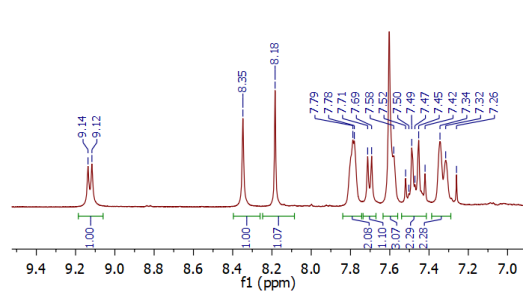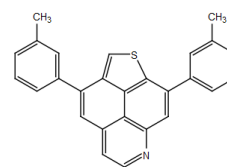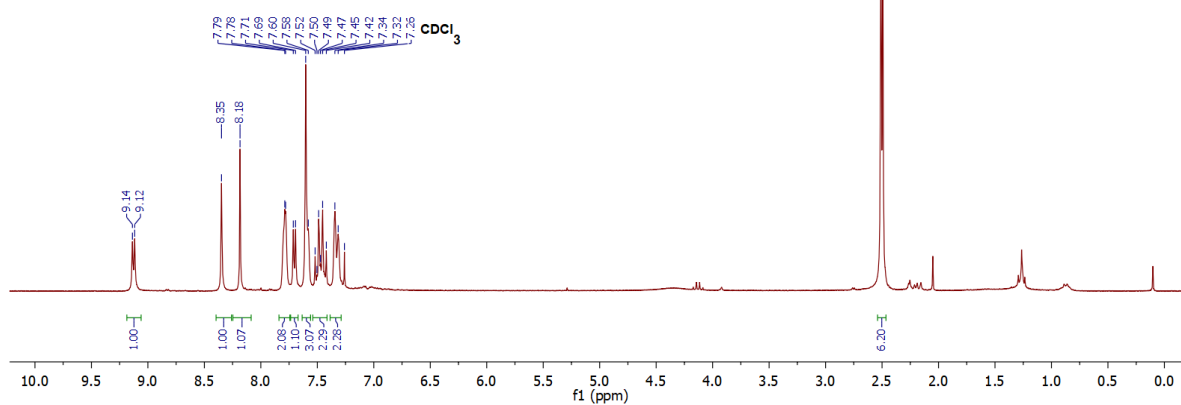

| Parameter                | Value             |
|--------------------------|-------------------|
| 1 Solvent                | CDCl <sub>3</sub> |
| 2 Temperature            | 298.0             |
| 3 Pulse Sequence         | zgpg30            |
| 4 Number of Scans        | 1024              |
| 5 Receiver Gain          | 2050              |
| 6 Relaxation Delay       | 2.0000            |
| 7 Pulse Width            | 10.0000           |
| 8 Acquisition Time       | 2.1846            |
| 9 Spectrometer Frequency | 62.90             |
| 10 Spectral Width        | 15000.0           |
| 11 Lowest Frequency      | -1203.7           |
| 12 Nucleus               | <sup>13</sup> C   |
| 13 Acquired Size         | 32768             |
| 14 Spectral Size         | 65536             |

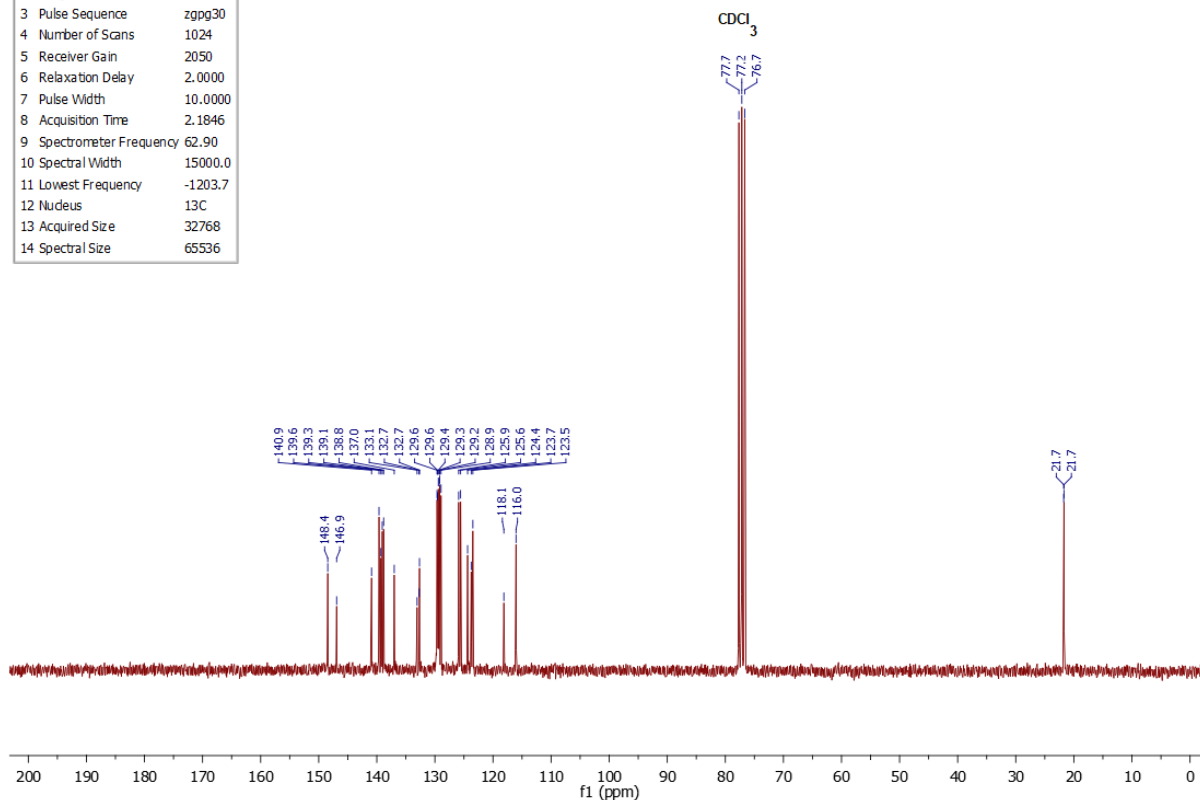

3,9-di-*o*-tolylthieno[2',3',4':4,5]naphtho[1,8-*bc*]pyridine (5d)

| Parameter                | Value   |
|--------------------------|---------|
| 1 Solvent                | CDCl3   |
| 2 Temperature            | 298.2   |
| 3 Pulse Sequence         | zg30    |
| 4 Number of Scans        | 16      |
| 5 Receiver Gain          | 362     |
| 6 Relaxation Delay       | 1.0000  |
| 7 Pulse Width            | 10.0000 |
| 8 Acquisition Time       | 6.3439  |
| 9 Spectrometer Frequency | 250.13  |
| 10 Spectral Width        | 5165.3  |
| 11 Lowest Frequency      | -1038.4 |
| 12 Nucleus               | 1H      |
| 13 Acquired Size         | 32768   |
| 14 Spectral Size         | 65536   |

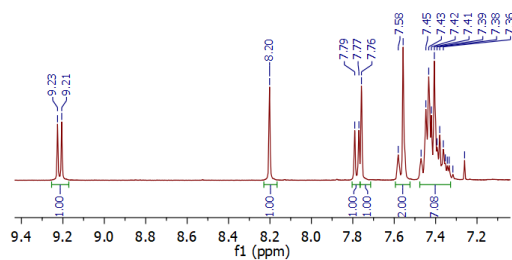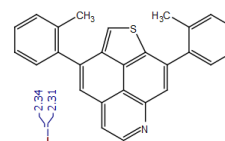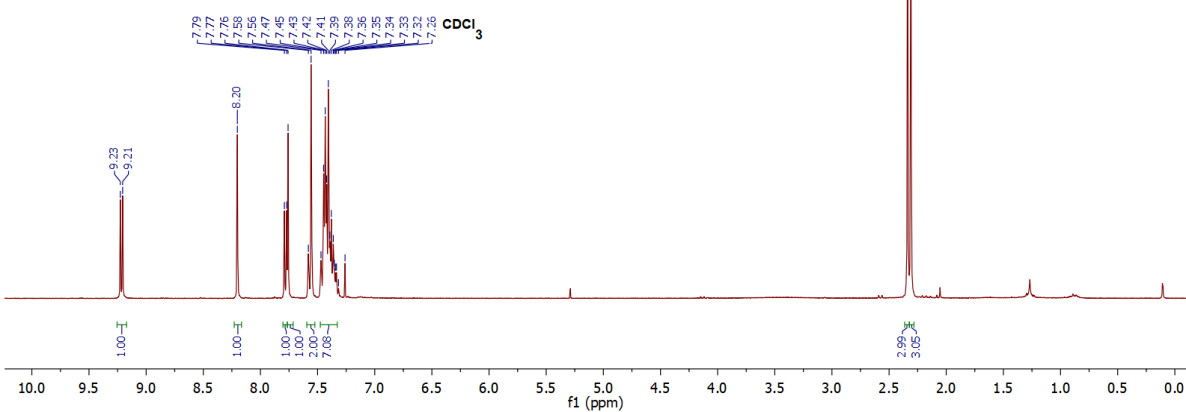

| Parameter                | Value   |
|--------------------------|---------|
| 1 Solvent                | CDCl3   |
| 2 Temperature            | 298.1   |
| 3 Pulse Sequence         | zgpg30  |
| 4 Number of Scans        | 2048    |
| 5 Receiver Gain          | 2050    |
| 6 Relaxation Delay       | 2.0000  |
| 7 Pulse Width            | 10.0000 |
| 8 Acquisition Time       | 2.1846  |
| 9 Spectrometer Frequency | 62.90   |
| 10 Spectral Width        | 15000.0 |
| 11 Lowest Frequency      | -1203.5 |
| 12 Nucleus               | 13C     |
| 13 Acquired Size         | 32768   |
| 14 Spectral Size         | 65536   |

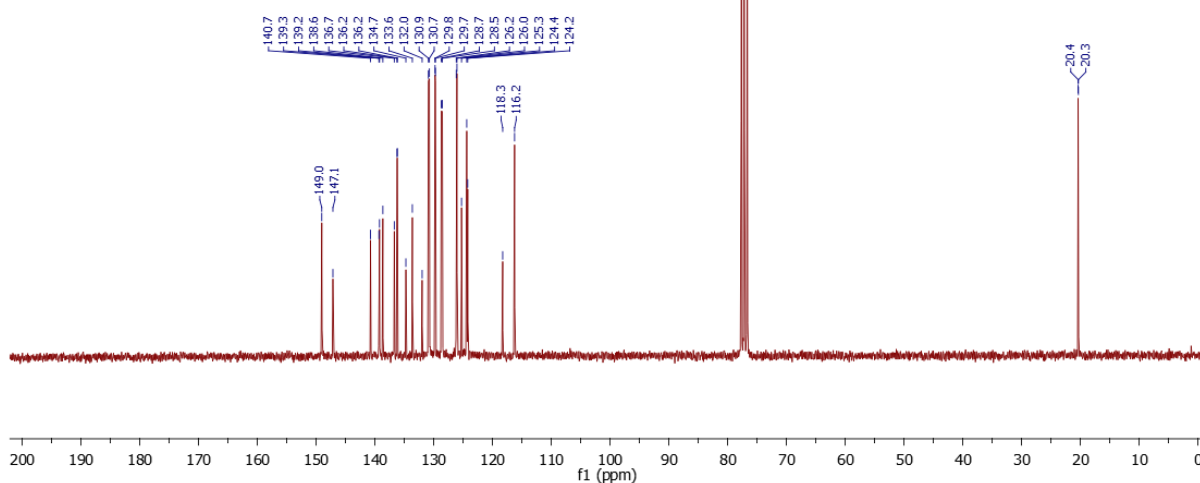

3,9-bis(4-fluorophenyl)thieno[2',3',4':4,5]naphtho[1,8-bc]pyridine (5e)

| Parameter                | Value   |
|--------------------------|---------|
| 1 Solvent                | CDCl3   |
| 2 Temperature            | 298.2   |
| 3 Pulse Sequence         | zg30    |
| 4 Number of Scans        | 16      |
| 5 Receiver Gain          | 645     |
| 6 Relaxation Delay       | 1.0000  |
| 7 Pulse Width            | 10.0000 |
| 8 Acquisition Time       | 6.3439  |
| 9 Spectrometer Frequency | 250.13  |
| 10 Spectral Width        | 5165.3  |
| 11 Lowest Frequency      | -1038.6 |
| 12 Nucleus               | 1H      |
| 13 Acquired Size         | 32768   |
| 14 Spectral Size         | 65536   |

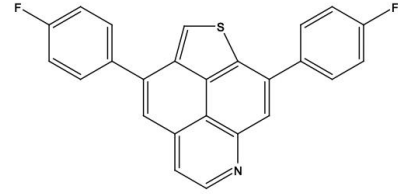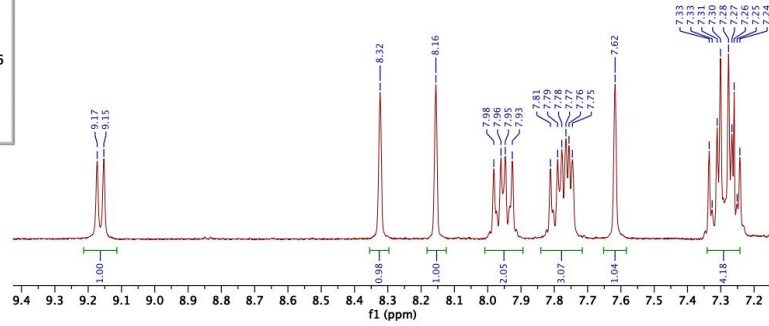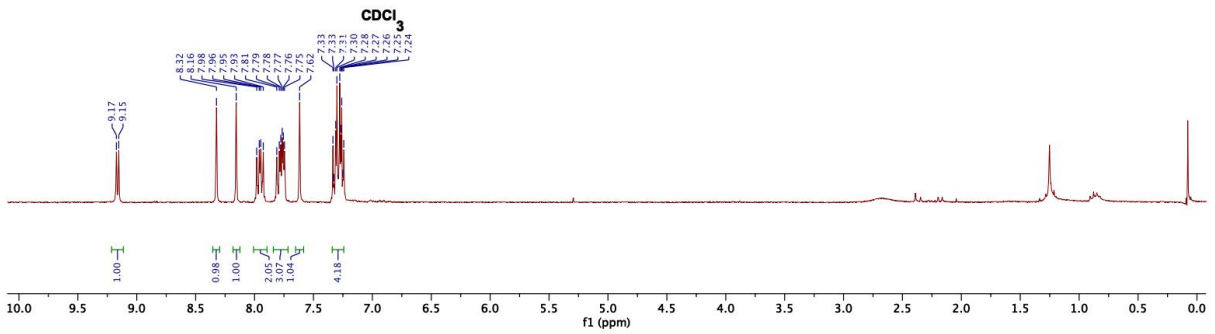

| Parameter                | Value     |
|--------------------------|-----------|
| 1 Solvent                | CDCl3     |
| 2 Temperature            | 298.3     |
| 3 Pulse Sequence         | zg1g      |
| 4 Number of Scans        | 16        |
| 5 Receiver Gain          | 101       |
| 6 Relaxation Delay       | 1.0000    |
| 7 Pulse Width            | 12.0000   |
| 8 Acquisition Time       | 0.5767    |
| 9 Spectrometer Frequency | 470.59    |
| 10 Spectral Width        | 113636.4  |
| 11 Lowest Frequency      | -103877.4 |
| 12 Nucleus               | 13C       |
| 13 Acquired Size         | 65536     |
| 14 Spectral Size         | 65536     |

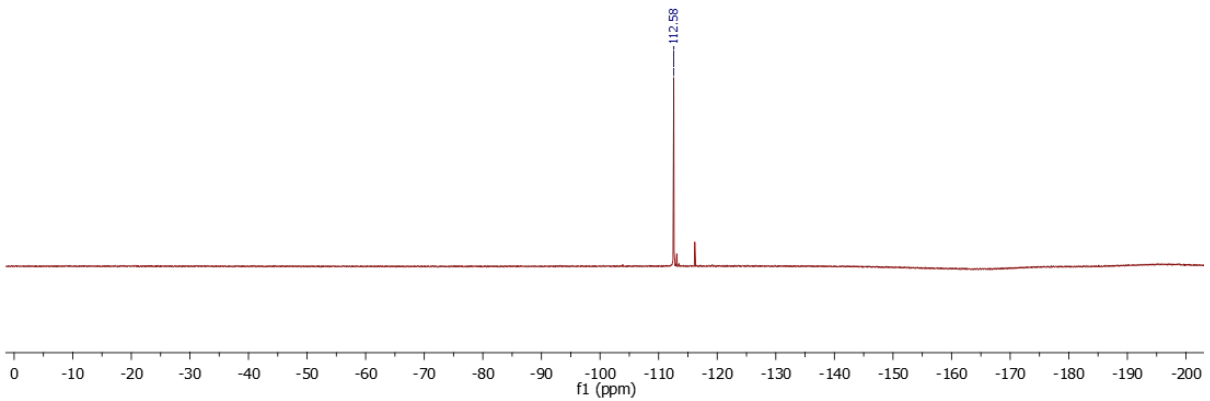



| Parameter                | Value             |
|--------------------------|-------------------|
| 1 Solvent                | CDCl <sub>3</sub> |
| 2 Temperature            | 298.2             |
| 3 Pulse Sequence         | zgpg30            |
| 4 Number of Scans        | 2048              |
| 5 Receiver Gain          | 2050              |
| 6 Relaxation Delay       | 2.0000            |
| 7 Pulse Width            | 10.0000           |
| 8 Acquisition Time       | 2.1846            |
| 9 Spectrometer Frequency | 62.90             |
| 10 Spectral Width        | 15000.0           |
| 11 Lowest Frequency      | -1202.8           |
| 12 Nucleus               | 13C               |
| 13 Acquired Size         | 32768             |
| 14 Spectral Size         | 65536             |

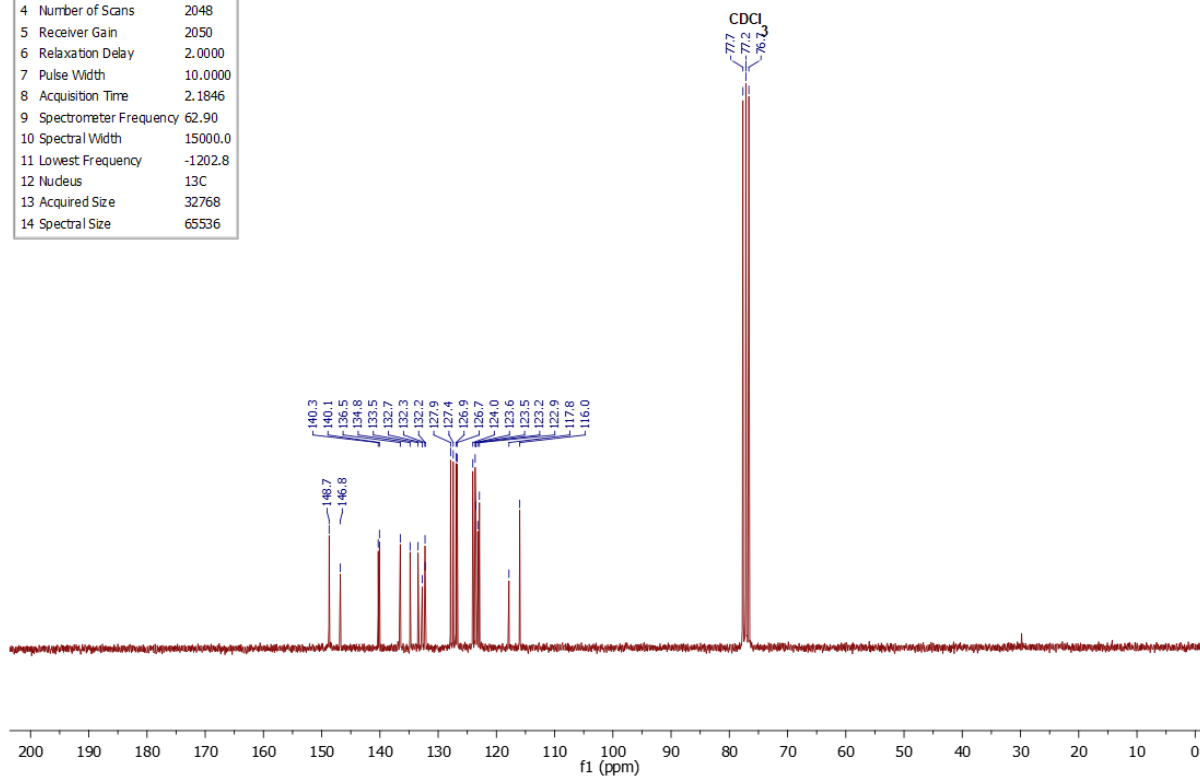

4,4'-(thieno[2',3',4':4,5]naphtho[1,8-bc]pyridine-3,9-diyl)bis(N,N-dimethylaniline) (5j)

| Parameter                | Value             |
|--------------------------|-------------------|
| 1 Solvent                | CDCl <sub>3</sub> |
| 2 Temperature            | 298.2             |
| 3 Pulse Sequence         | zg30              |
| 4 Number of Scans        | 16                |
| 5 Receiver Gain          | 645               |
| 6 Relaxation Delay       | 1.0000            |
| 7 Pulse Width            | 10.0000           |
| 8 Acquisition Time       | 6.3439            |
| 9 Spectrometer Frequency | 250.13            |
| 10 Spectral Width        | 5165.3            |
| 11 Lowest Frequency      | -1038.4           |
| 12 Nucleus               | 1H                |
| 13 Acquired Size         | 32768             |
| 14 Spectral Size         | 65536             |

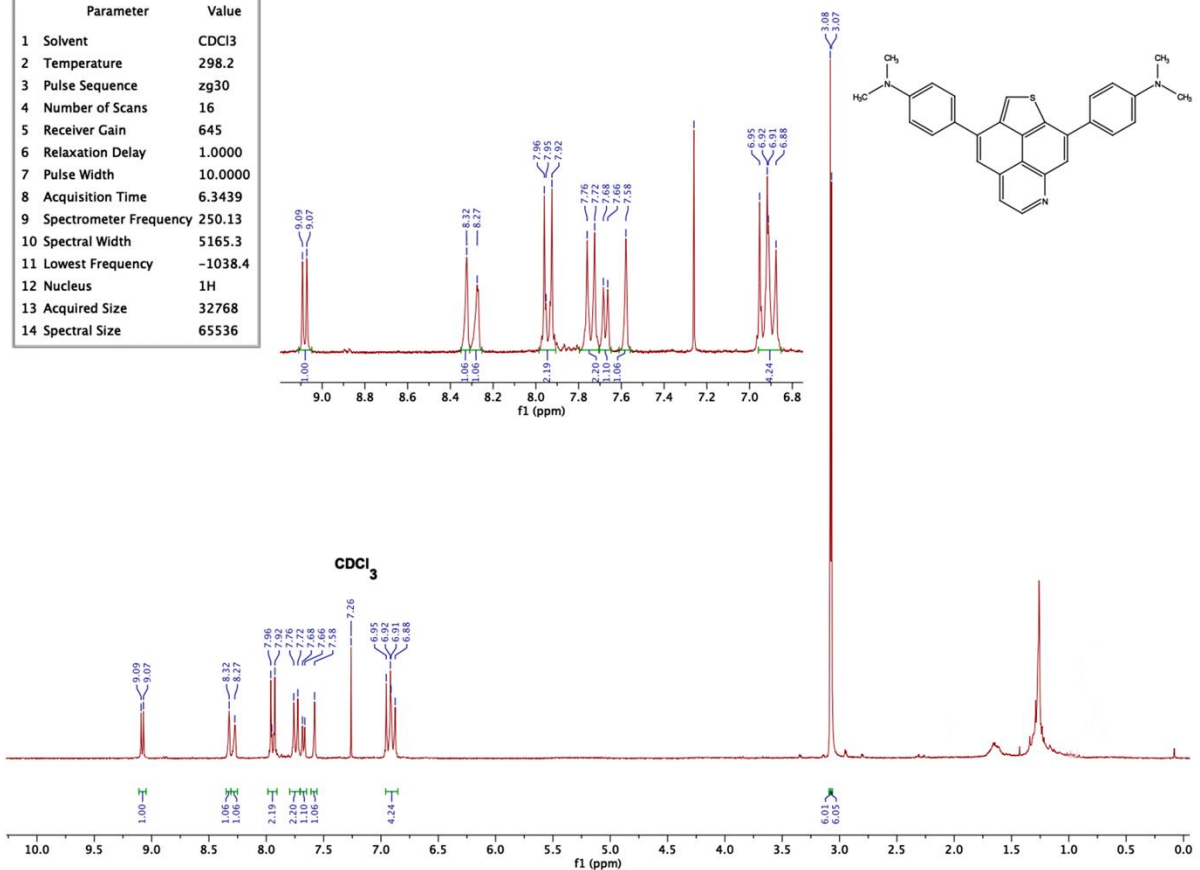

| Parameter                | Value             |
|--------------------------|-------------------|
| 1 Solvent                | CDCl <sub>3</sub> |
| 2 Temperature            | 298.2             |
| 3 Pulse Sequence         | zgpg30            |
| 4 Number of Scans        | 1024              |
| 5 Receiver Gain          | 2050              |
| 6 Relaxation Delay       | 2.0000            |
| 7 Pulse Width            | 10.0000           |
| 8 Acquisition Time       | 2.1846            |
| 9 Spectrometer Frequency | 62.90             |
| 10 Spectral Width        | 15000.0           |
| 11 Lowest Frequency      | -1201.3           |
| 12 Nucleus               | <sup>13</sup> C   |
| 13 Acquired Size         | 32768             |
| 14 Spectral Size         | 65536             |

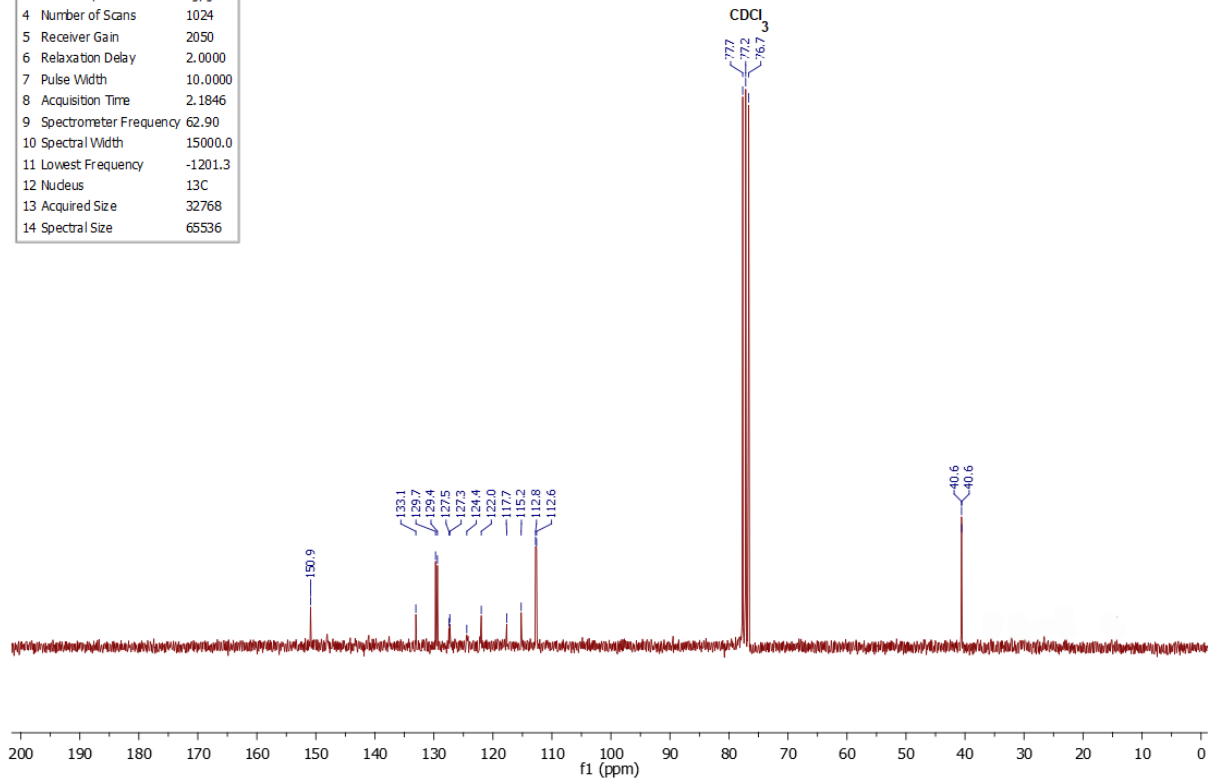

### 3,9-diphenylthieno[4,3',2':4,5]naphtho[1,8-bc]pyridine (6a)

| Parameter                | Value             |
|--------------------------|-------------------|
| 1 Solvent                | CDCl <sub>3</sub> |
| 2 Temperature            | 298.2             |
| 3 Pulse Sequence         | zg30              |
| 4 Number of Scans        | 16                |
| 5 Receiver Gain          | 101               |
| 6 Relaxation Delay       | 1.0000            |
| 7 Pulse Width            | 8.0000            |
| 8 Acquisition Time       | 3.2768            |
| 9 Spectrometer Frequency | 500.13            |
| 10 Spectral Width        | 10000.0           |
| 11 Lowest Frequency      | -1924.1           |
| 12 Nucleus               | <sup>1</sup> H    |
| 13 Acquired Size         | 32768             |
| 14 Spectral Size         | 65536             |

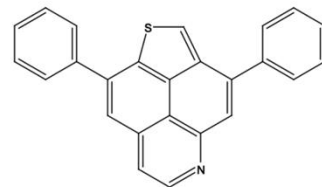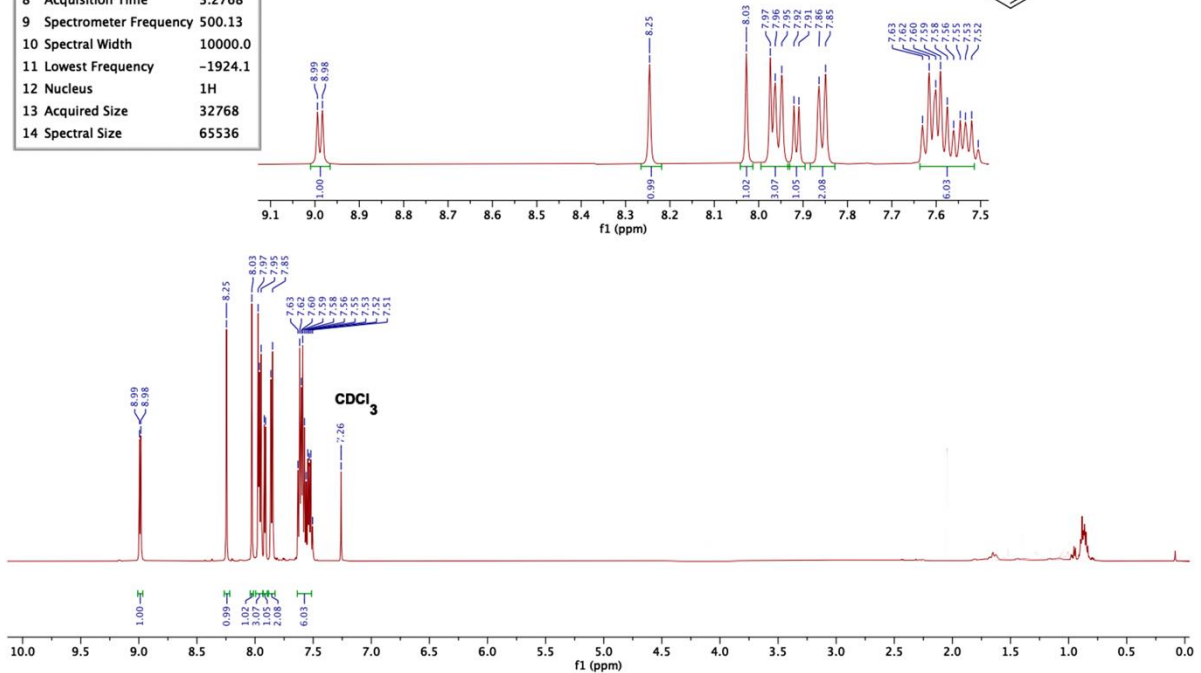

| Parameter                | Value             |
|--------------------------|-------------------|
| 1 Solvent                | CDCl <sub>3</sub> |
| 2 Temperature            | 298.2             |
| 3 Pulse Sequence         | zgpg30            |
| 4 Number of Scans        | 1024              |
| 5 Receiver Gain          | 101               |
| 6 Relaxation Delay       | 2.0000            |
| 7 Pulse Width            | 10.0000           |
| 8 Acquisition Time       | 1.0879            |
| 9 Spectrometer Frequency | 125.76            |
| 10 Spectral Width        | 30120.5           |
| 11 Lowest Frequency      | -2469.5           |
| 12 Nucleus               | <sup>13</sup> C   |
| 13 Acquired Size         | 32768             |
| 14 Spectral Size         | 32768             |

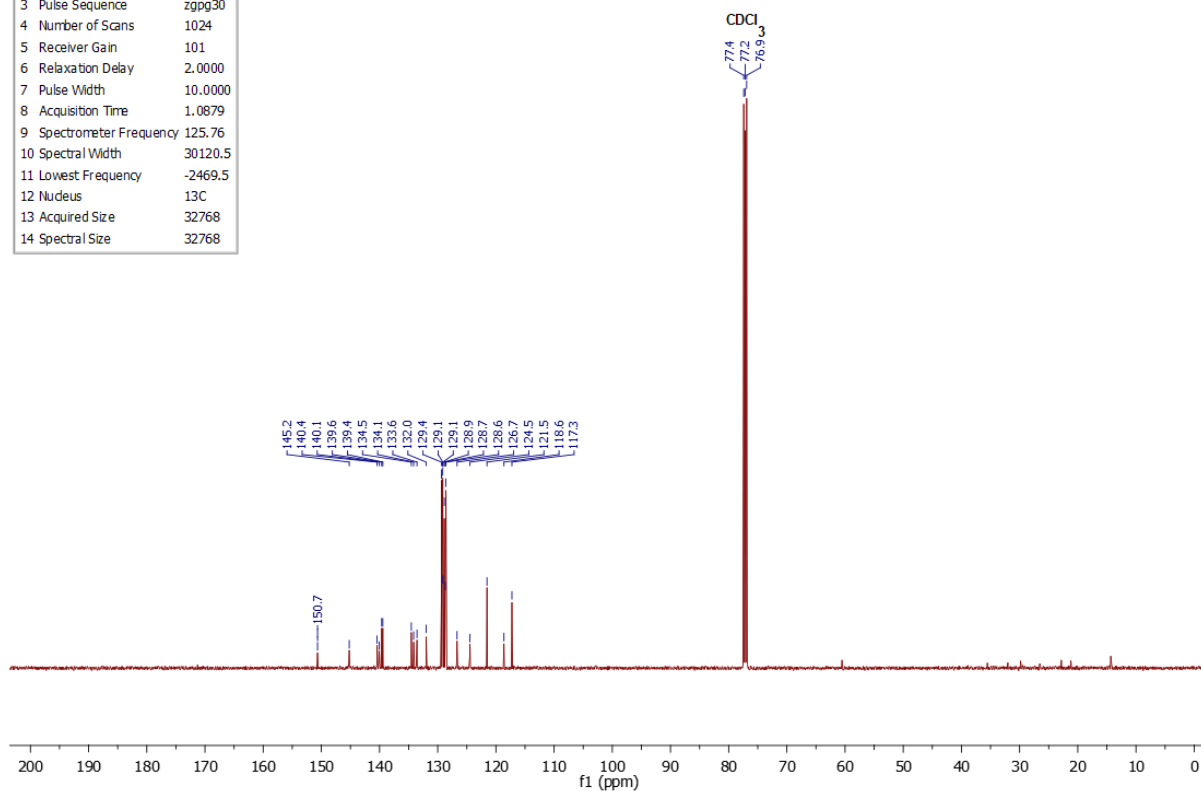

### 3,9-di-*p*-tolylthieno[4',3',2':4,5]naphtho[1,8-*bc*]pyridine (6b)

| Parameter                | Value             |
|--------------------------|-------------------|
| 1 Solvent                | CDCl <sub>3</sub> |
| 2 Temperature            | 298.2             |
| 3 Pulse Sequence         | zg30              |
| 4 Number of Scans        | 16                |
| 5 Receiver Gain          | 101               |
| 6 Relaxation Delay       | 1.0000            |
| 7 Pulse Width            | 8.0000            |
| 8 Acquisition Time       | 3.2768            |
| 9 Spectrometer Frequency | 500.13            |
| 10 Spectral Width        | 10000.0           |
| 11 Lowest Frequency      | -1923.8           |
| 12 Nucleus               | <sup>1</sup> H    |
| 13 Acquired Size         | 32768             |
| 14 Spectral Size         | 65536             |

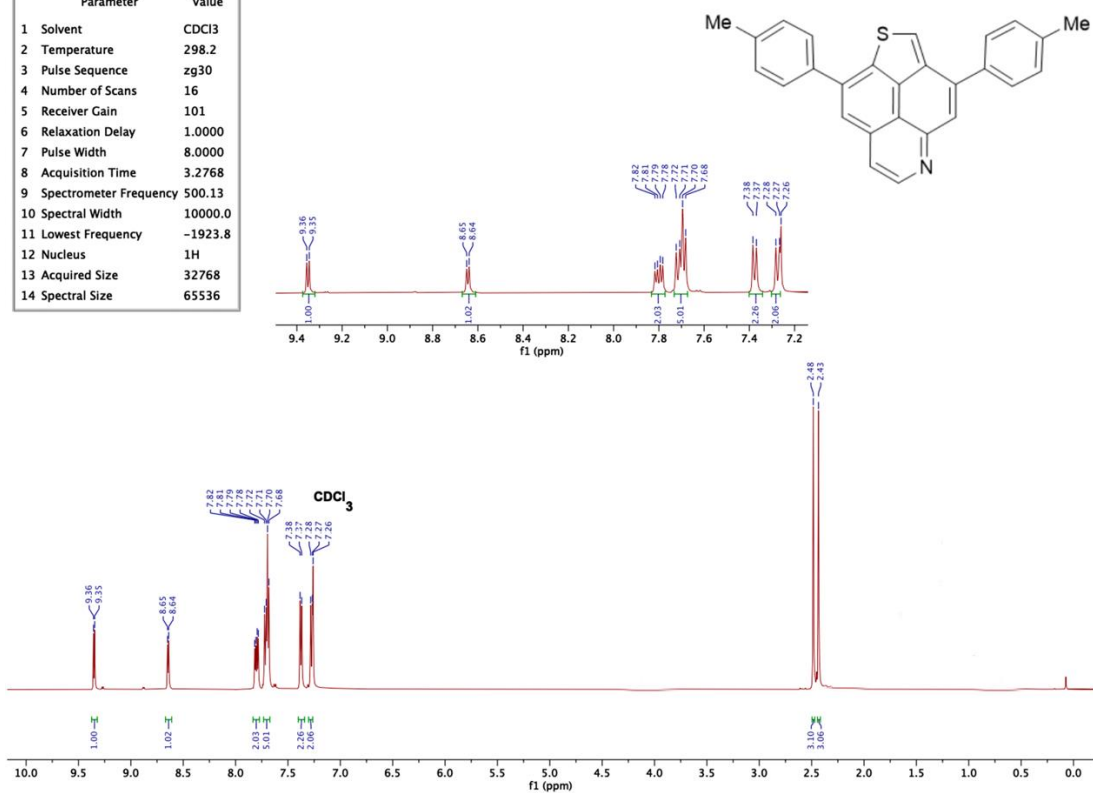

| Parameter                | Value             |
|--------------------------|-------------------|
| 1 Solvent                | CDCl <sub>3</sub> |
| 2 Temperature            | 298.2             |
| 3 Pulse Sequence         | zgpg30            |
| 4 Number of Scans        | 1024              |
| 5 Receiver Gain          | 101               |
| 6 Relaxation Delay       | 2.0000            |
| 7 Pulse Width            | 10.0000           |
| 8 Acquisition Time       | 1.0879            |
| 9 Spectrometer Frequency | 125.76            |
| 10 Spectral Width        | 30120.5           |
| 11 Lowest Frequency      | -2467.2           |
| 12 Nucleus               | <sup>13</sup> C   |
| 13 Acquired Size         | 32768             |
| 14 Spectral Size         | 32768             |

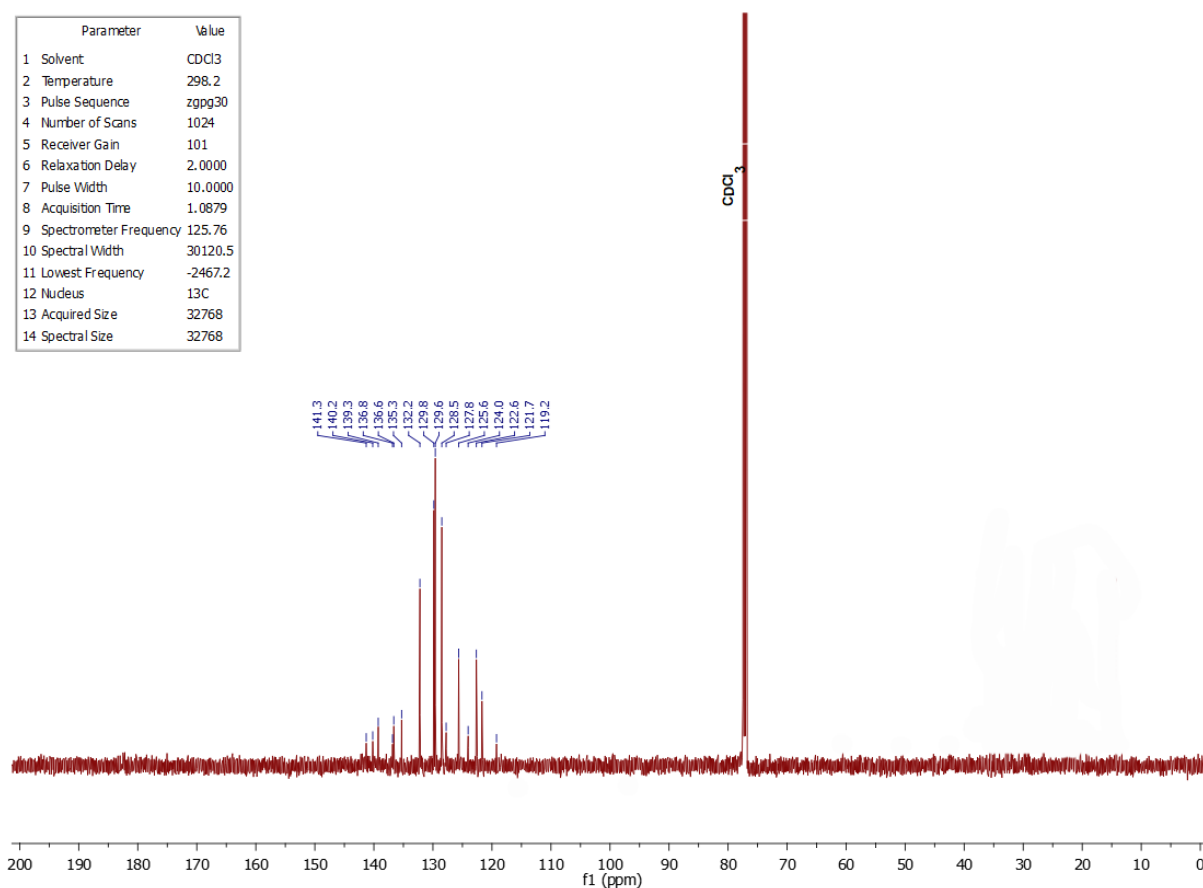

### 3,11-diphenylthieno[2',3',4':4,5]naphtho[1,8-bc]quinoline (8a)

| Parameter                | Value             |
|--------------------------|-------------------|
| 1 Solvent                | CDCl <sub>3</sub> |
| 2 Temperature            | 298.2             |
| 3 Pulse Sequence         | zg30              |
| 4 Number of Scans        | 32                |
| 5 Receiver Gain          | 101               |
| 6 Relaxation Delay       | 1.0000            |
| 7 Pulse Width            | 8.0000            |
| 8 Acquisition Time       | 3.2768            |
| 9 Spectrometer Frequency | 500.13            |
| 10 Spectral Width        | 10000.0           |
| 11 Lowest Frequency      | -1923.9           |
| 12 Nucleus               | <sup>1</sup> H    |
| 13 Acquired Size         | 32768             |
| 14 Spectral Size         | 65536             |

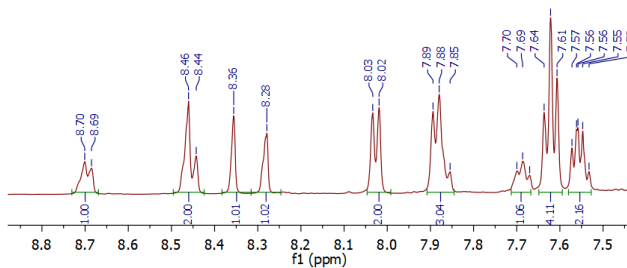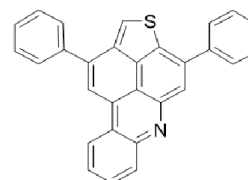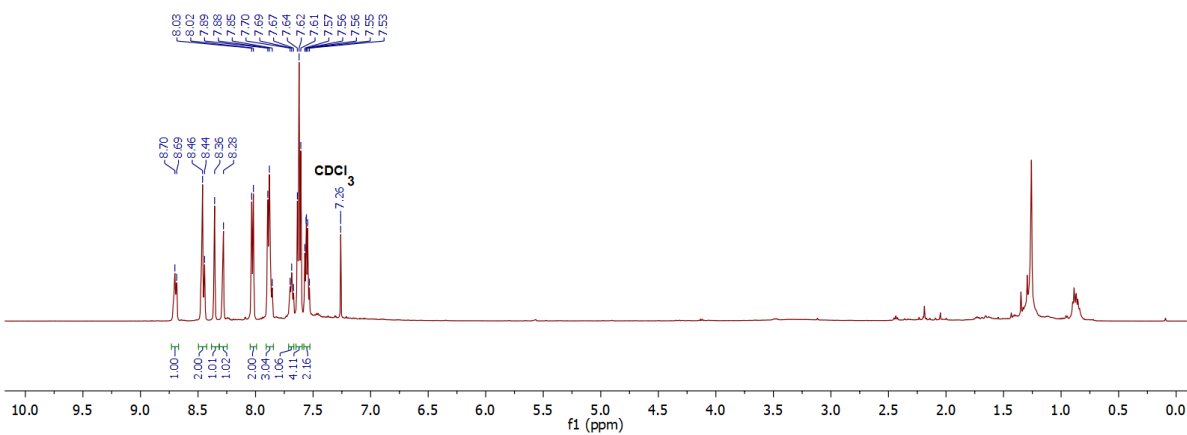



| Parameter                | Value   |
|--------------------------|---------|
| 1 Solvent                | CDCl3   |
| 2 Temperature            | 298.1   |
| 3 Pulse Sequence         | zgpg30  |
| 4 Number of Scans        | 2048    |
| 5 Receiver Gain          | 101     |
| 6 Relaxation Delay       | 2.0000  |
| 7 Pulse Width            | 10.0000 |
| 8 Acquisition Time       | 1.0879  |
| 9 Spectrometer Frequency | 125.76  |
| 10 Spectral Width        | 30120.5 |
| 11 Lowest Frequency      | -2470.1 |
| 12 Nucleus               | 13C     |
| 13 Acquired Size         | 32768   |
| 14 Spectral Size         | 32768   |

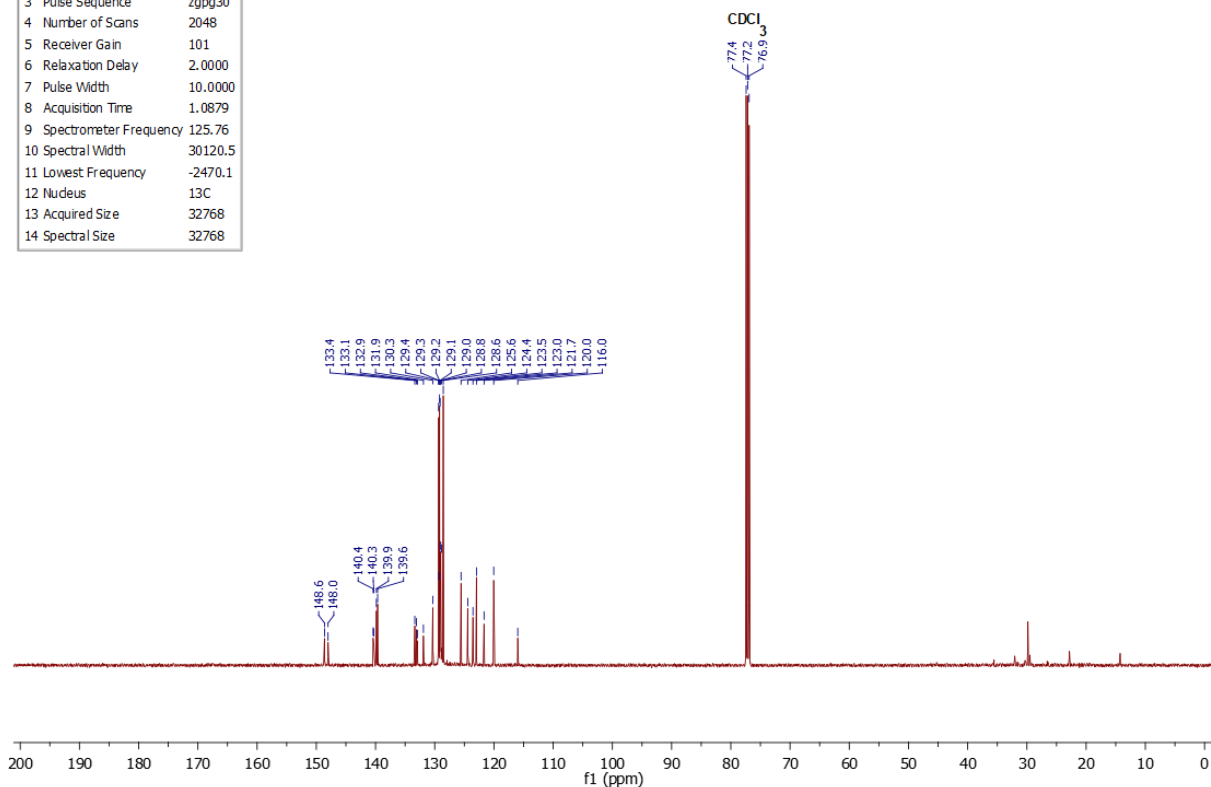

### 3,11-bis(4-fluorophenyl)thieno[2',3',4':4,5]naphtho[1,8-*bc*]quinoline (8b)

| Parameter                | Value   |
|--------------------------|---------|
| 1 Solvent                | CDCl3   |
| 2 Temperature            | 298.2   |
| 3 Pulse Sequence         | zg30    |
| 4 Number of Scans        | 32      |
| 5 Receiver Gain          | 72      |
| 6 Relaxation Delay       | 2.0000  |
| 7 Pulse Width            | 10.0000 |
| 8 Acquisition Time       | 4.3691  |
| 9 Spectrometer Frequency | 300.13  |
| 10 Spectral Width        | 7500.0  |
| 11 Lowest Frequency      | -1354.7 |
| 12 Nucleus               | 1H      |
| 13 Acquired Size         | 32768   |
| 14 Spectral Size         | 65536   |

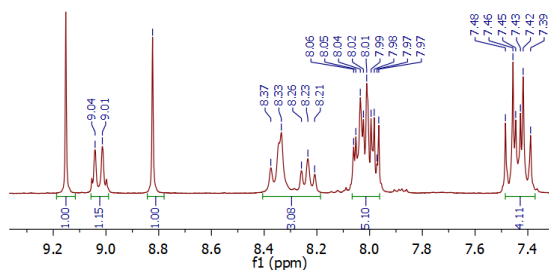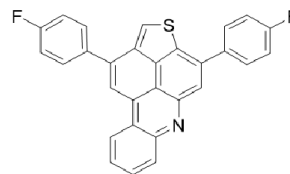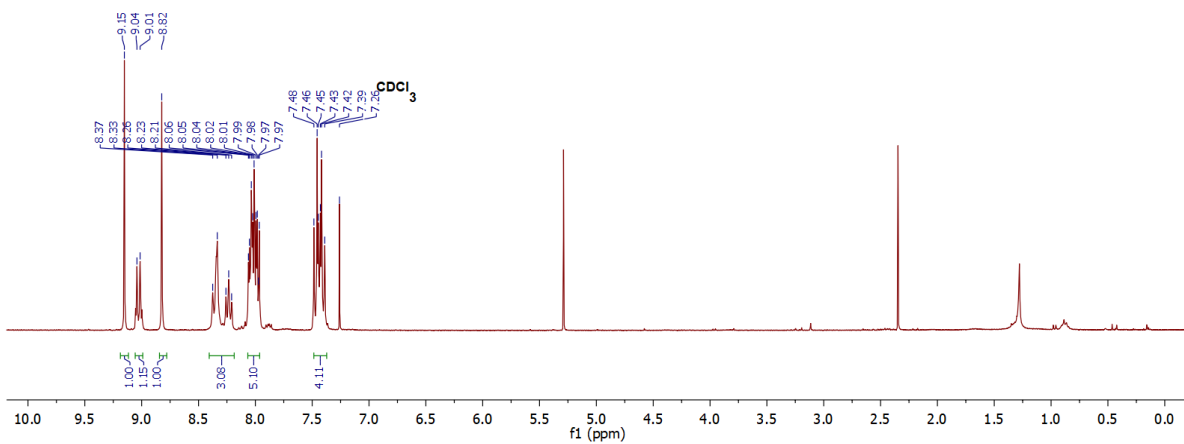

| Parameter                | Value    |
|--------------------------|----------|
| 1 Solvent                | CDCl3    |
| 2 Temperature            | 298.4    |
| 3 Pulse Sequence         | zgfhigqn |
| 4 Number of Scans        | 64       |
| 5 Receiver Gain          | 228      |
| 6 Relaxation Delay       | 1.0000   |
| 7 Pulse Width            | 10.0000  |
| 8 Acquisition Time       | 0.9787   |
| 9 Spectrometer Frequency | 282.40   |
| 10 Spectral Width        | 66964.3  |
| 11 Lowest Frequency      | -61722.4 |
| 12 Nucleus               | 19F      |
| 13 Acquired Size         | 65536    |
| 14 Spectral Size         | 131072   |

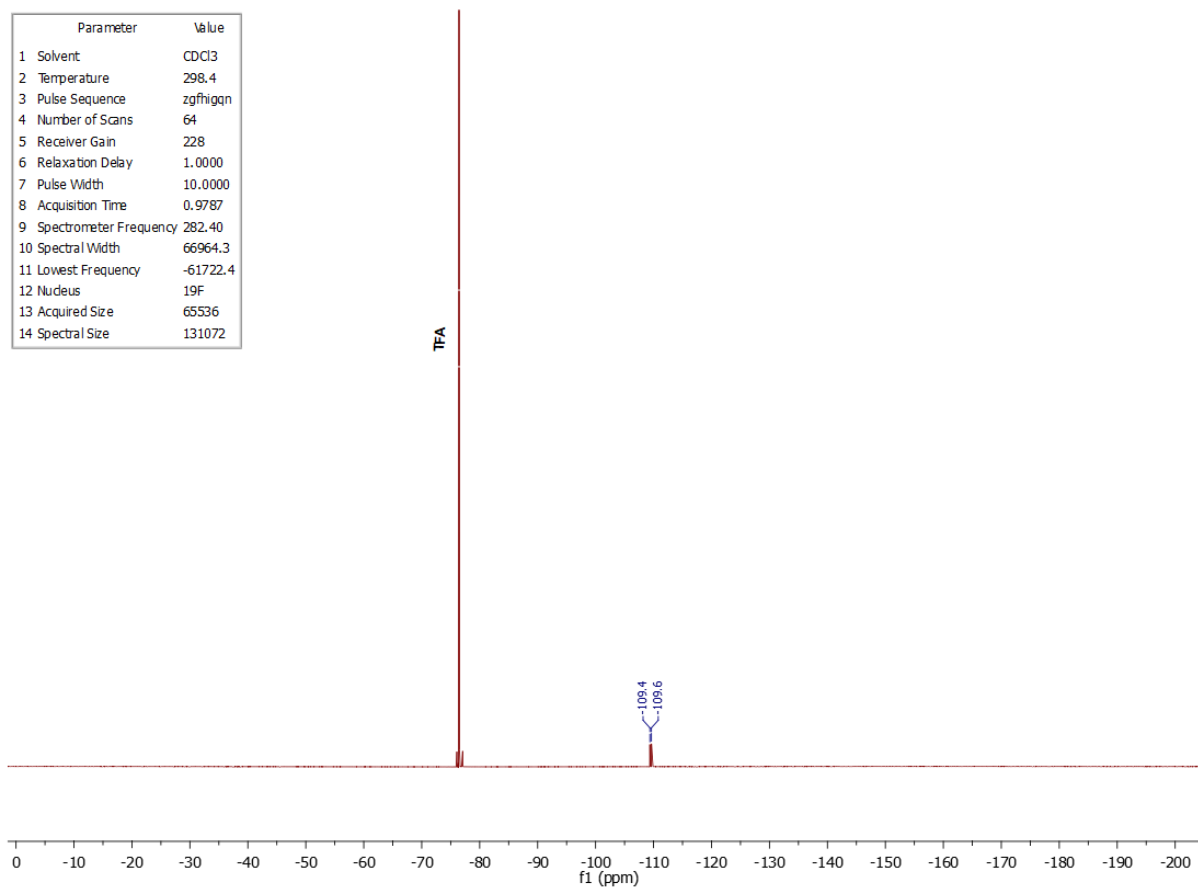

| Parameter                | Value   |
|--------------------------|---------|
| 1 Solvent                | CDCl3   |
| 2 Temperature            | 298.8   |
| 3 Pulse Sequence         | zpgq30  |
| 4 Number of Scans        | 6144    |
| 5 Receiver Gain          | 2050    |
| 6 Relaxation Delay       | 4.0000  |
| 7 Pulse Width            | 10.0000 |
| 8 Acquisition Time       | 1.8176  |
| 9 Spectrometer Frequency | 75.47   |
| 10 Spectral Width        | 18028.8 |
| 11 Lowest Frequency      | -1442.9 |
| 12 Nucleus               | 13C     |
| 13 Acquired Size         | 32768   |
| 14 Spectral Size         | 65536   |

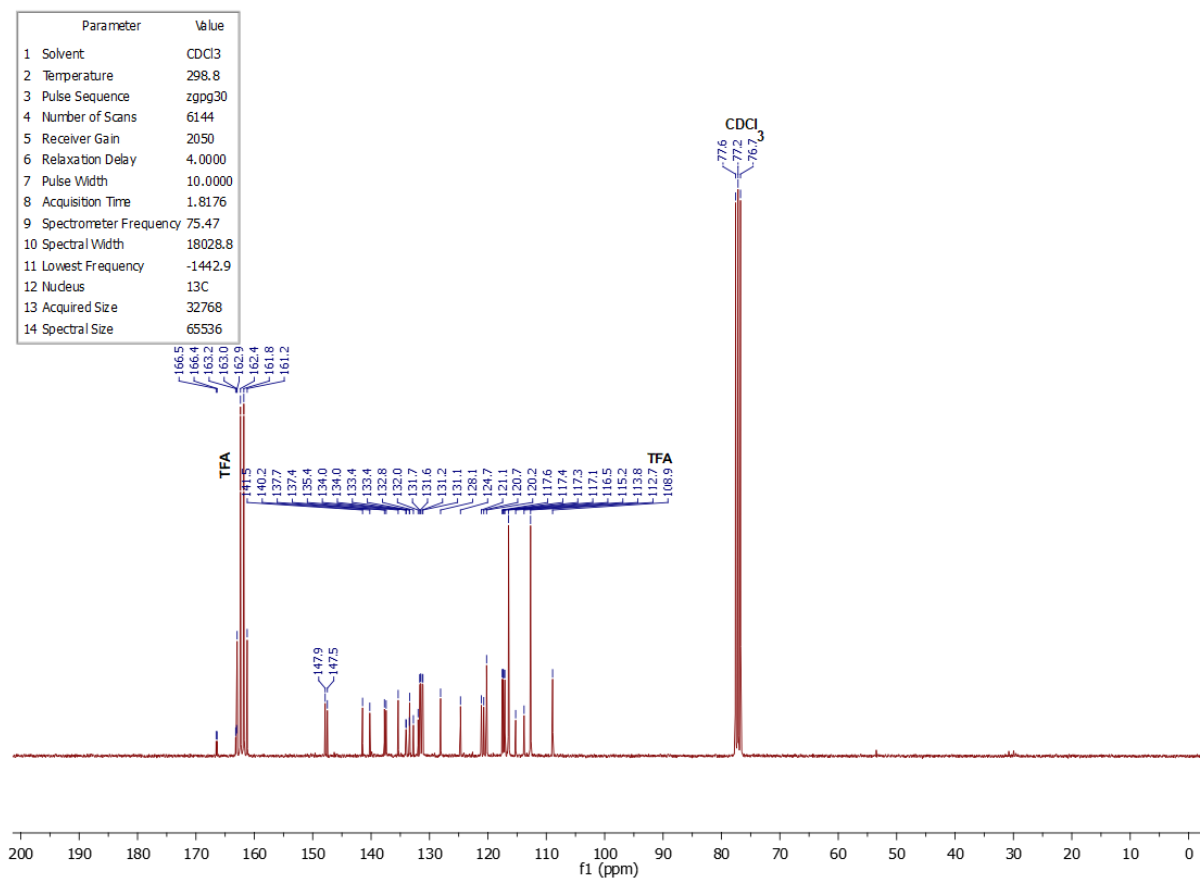

**4,4'-(thieno[2',3',4':4,5]naphtho[1,8-bc]quinoline-3,11-diyl)bis(N,N-dimethylaniline) (8c)**

| Parameter                | Value             |
|--------------------------|-------------------|
| 1 Solvent                | CDCl <sub>3</sub> |
| 2 Temperature            | 298.1             |
| 3 Pulse Sequence         | zg30              |
| 4 Number of Scans        | 64                |
| 5 Receiver Gain          | 101               |
| 6 Relaxation Delay       | 1.0000            |
| 7 Pulse Width            | 8.0000            |
| 8 Acquisition Time       | 3.2768            |
| 9 Spectrometer Frequency | 500.13            |
| 10 Spectral Width        | 10000.0           |
| 11 Lowest Frequency      | -1967.0           |
| 12 Nucleus               | <sup>1</sup> H    |
| 13 Acquired Size         | 32768             |
| 14 Spectral Size         | 65536             |

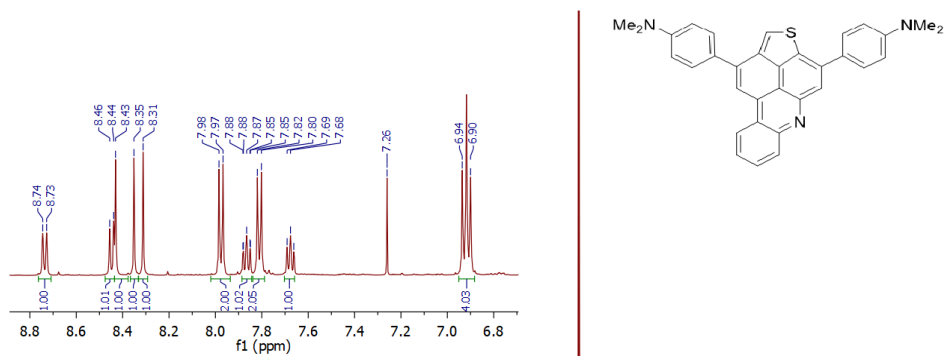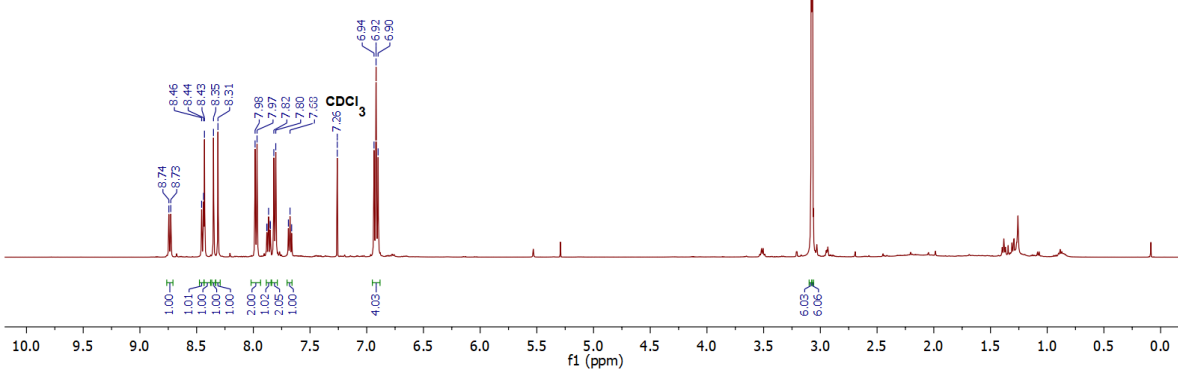

| Parameter                | Value             |
|--------------------------|-------------------|
| 1 Solvent                | CDCl <sub>3</sub> |
| 2 Temperature            | 298.2             |
| 3 Pulse Sequence         | zgpg30            |
| 4 Number of Scans        | 4096              |
| 5 Receiver Gain          | 101               |
| 6 Relaxation Delay       | 2.0000            |
| 7 Pulse Width            | 10.0000           |
| 8 Acquisition Time       | 1.0879            |
| 9 Spectrometer Frequency | 125.76            |
| 10 Spectral Width        | 30120.5           |
| 11 Lowest Frequency      | -2470.6           |
| 12 Nucleus               | <sup>13</sup> C   |
| 13 Acquired Size         | 32768             |
| 14 Spectral Size         | 32768             |

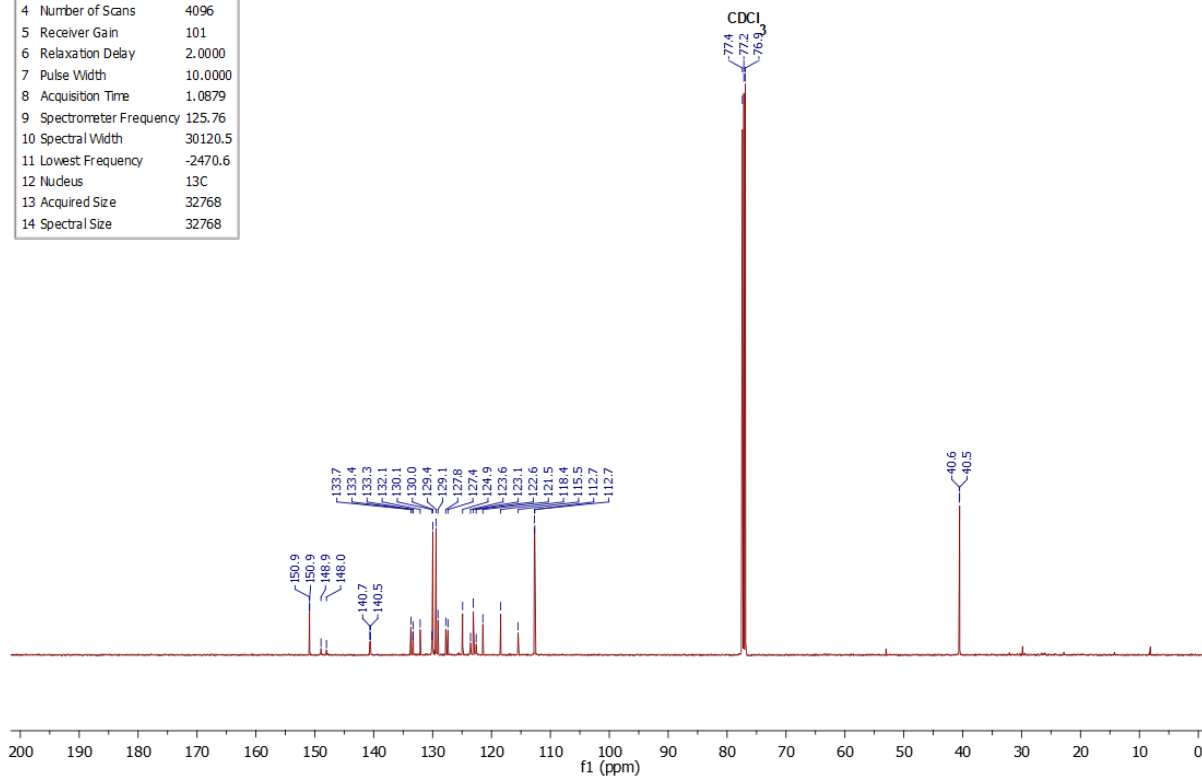

Supplement: d4ob01023j1.pdf [file d4ob01023j1.pdf]
